# Supplementary material for: Synthesis and reactivity of N-heterocyclic carbene (NHC) gold-fluoroalkoxide complexes
Source: Royal Society of Chemistry journal article supplement (doi:10.1039/d4dt01402b), 2024-01-01

**Supporting Information**  
**for**  
**Synthesis and reactivity of N-heterocyclic carbene (NHC)**  
**gold-fluoroalkoxide complexes**

Pierre Arnaut,<sup>a</sup> Nestor Bracho Pozsoni,<sup>a</sup> Fady Nahra,<sup>a,b</sup> Nikolaos V. Tzouras<sup>\*a</sup>  
and Steven P. Nolan<sup>\*a</sup>

<sup>a</sup> Department of Chemistry and Centre for Sustainable Chemistry,  
Ghent University, Krijgslaan 281, S-3, 9000 Ghent, Belgium

<sup>b</sup> Separation and Conversion Technology, VITO (Flemish Institute for Technological Research),  
Boeretang 200, 2400 Mol, Belgium.

## Table of content

|                           |    |
|---------------------------|----|
| General information ..... | 3  |
| NMR Data .....            | 4  |
| HRMS Data .....           | 71 |

## General information

All reactions were performed in glass vials in air. Ethanol was dried on molecular sieves before use for 16 hours.  $K_2CO_3$  was finely grinded with a mortar and pestle, and dried under high vacuum before use. All other reagents and solvents were purchased and used as received without any additional purification.  $^1H$  and  $^{13}C$ - $\{^1H\}$  apt and  $^{19}F$  NMR spectra were recorded in  $C_6D_6$  or  $CDCl_3$  using Bruker 300, 400 and 500 MHz spectrometers. Chemical shifts (ppm) in  $^1H$  and  $^{13}C$  NMR spectra are referenced to the residual solvent peak ( $C_6D_6$ :  $\delta H=7.16$  ppm,  $\delta C=128.06$  ppm); ( $CDCl_3$ :  $\delta H=7.26$  ppm,  $\delta C=77.16$  ppm).  $^1H$  NMR splitting patterns are abbreviated as follows: broad signal (br), singlet (s), doublet (d), triplet (t), doublet of doublets (dd), doublet of triplets (dt), triplet of triplets (tt), quartet (q), quintet (quint), heptet (hept), multiplet (m). All compounds were synthesized according to the procedures described in the literature and the present article. All HRMS experiments (TOF for complex **1f**, and ORBITRAP for complexes **1b,1c, 1d, 1g, 1h, 1i, 1j, 2a**) were performed at Ghent University.

## Optimization of the synthesis of gold-acetylide complexes from gold-fluoroalkoxides

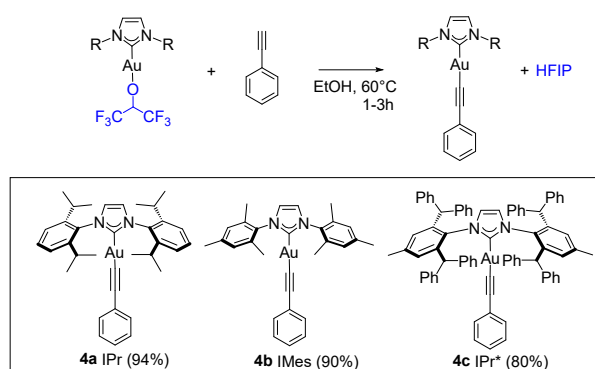

| Product   | Alkyne (eq) | Temp (°C) | Time (h) | Solvent | Yield (%) |
|-----------|-------------|-----------|----------|---------|-----------|
| <b>4a</b> | 1           | 60        | 1        | EtOH    | 94        |
| <b>4a</b> | 2           | 25        | 6        | EtOH    | 75        |
| <b>4a</b> | 3           | 25        | 1        | Toluene | 77        |
| <b>4a</b> | 3           | 25        | 1        | THF     | 72        |
| <b>4b</b> | 1           | 60        | 1        | EtOH    | 90        |
| <b>4c</b> | 1           | 60        | 3        | EtOH    | 80        |
| <b>4c</b> | 3           | 60        | 3        | EtOH    | 85        |

Table S1. Optimization of gold-acetylides synthesis.

## NMR Data

### $^1\text{H}$ NMR Spectra of $[\text{Au}(\text{IPr})(\text{OCH}(\text{CF}_3)_2)]$ (1a)

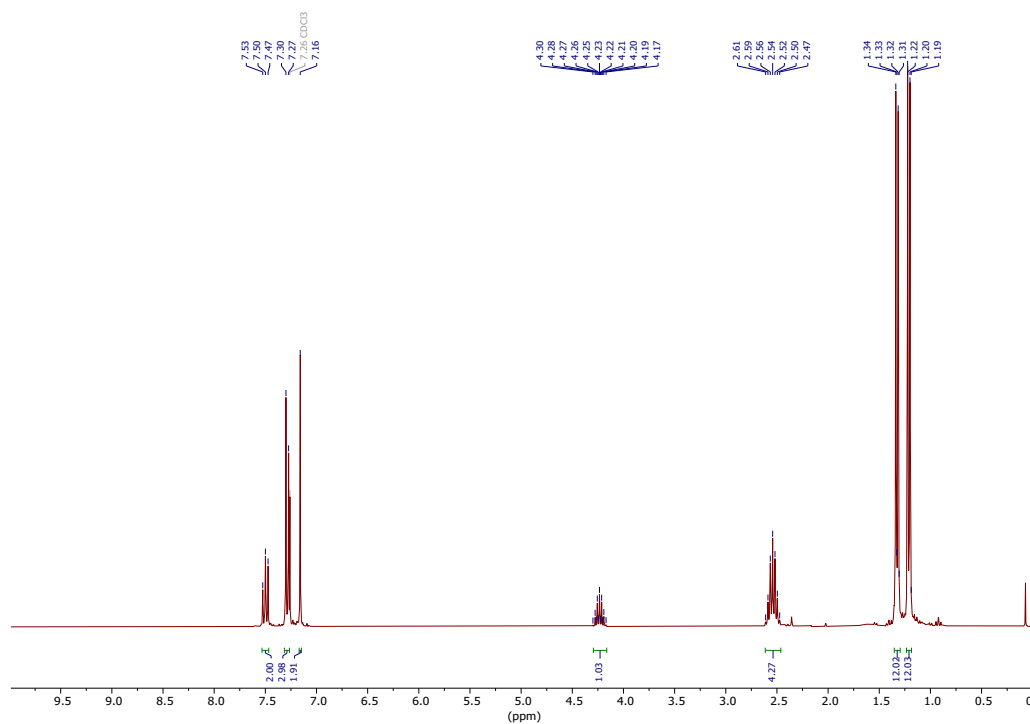

### $^1\text{H}$ NMR of $[\text{Au}(\text{SIPr})(\text{OCH}(\text{CF}_3)_2)]$ (1b)

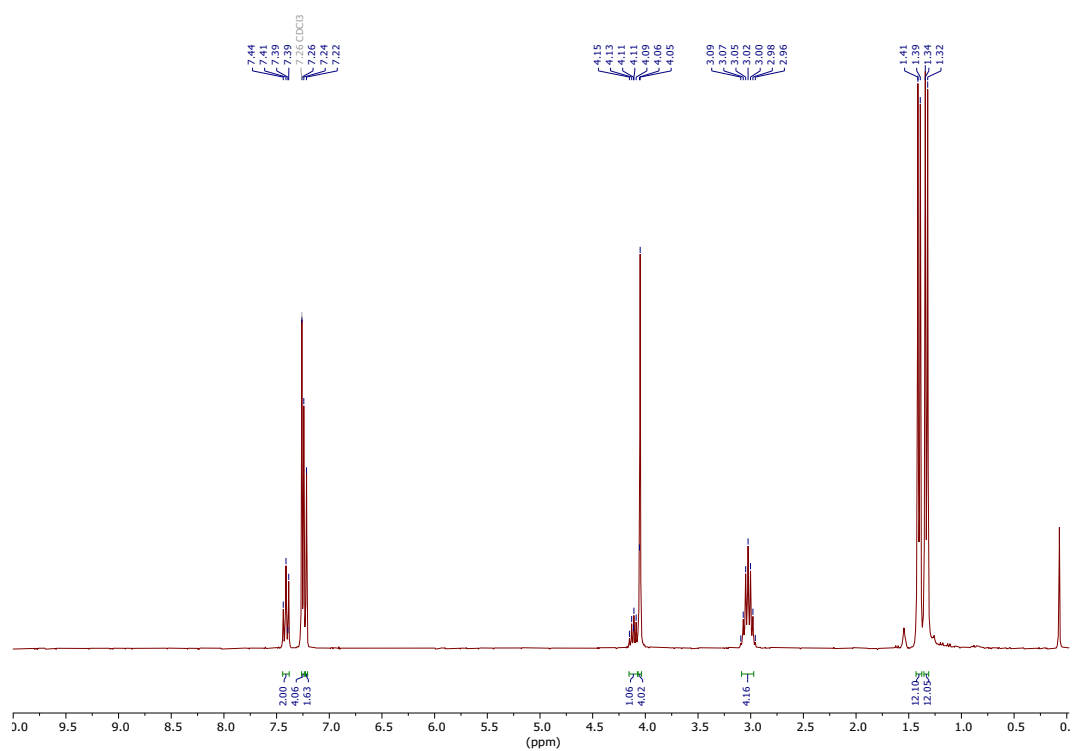

**<sup>13</sup>C NMR of 1b**

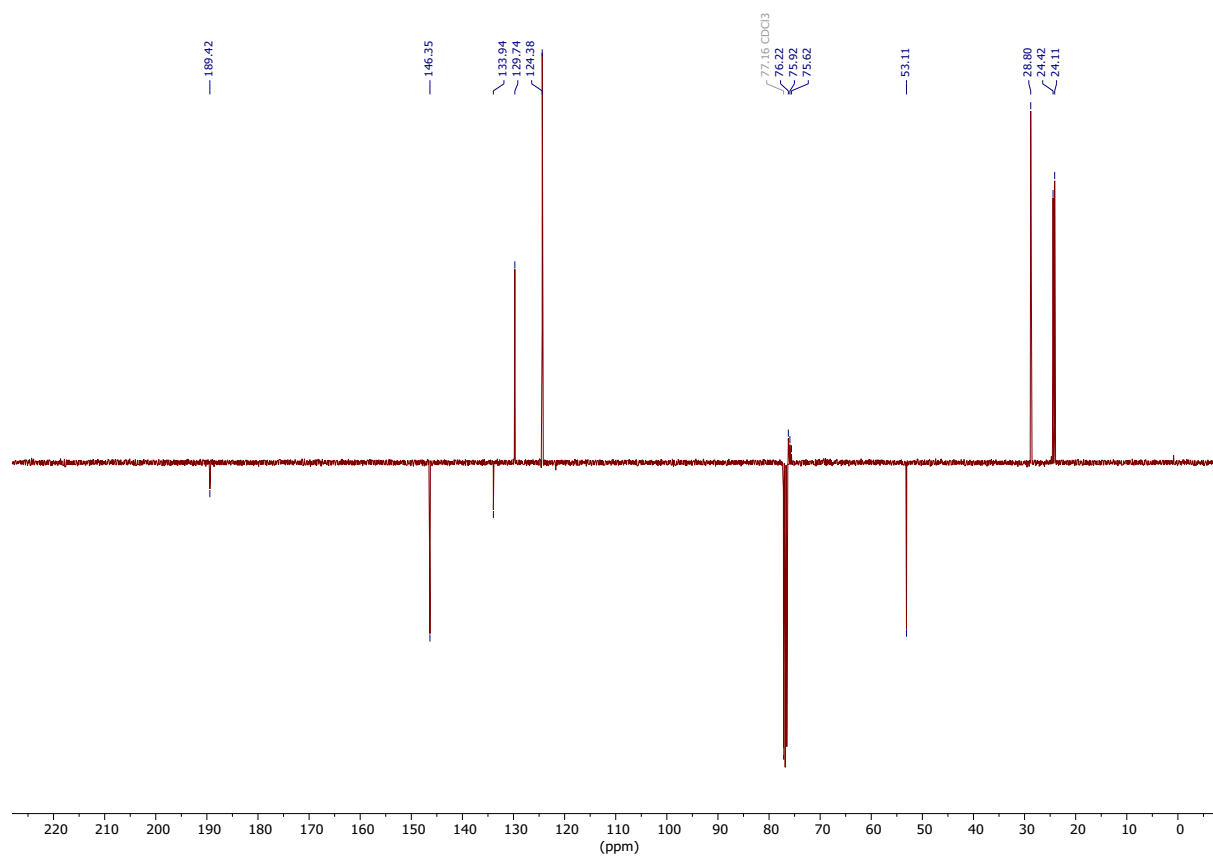

**$^{19}\text{F}$  NMR of 1b**

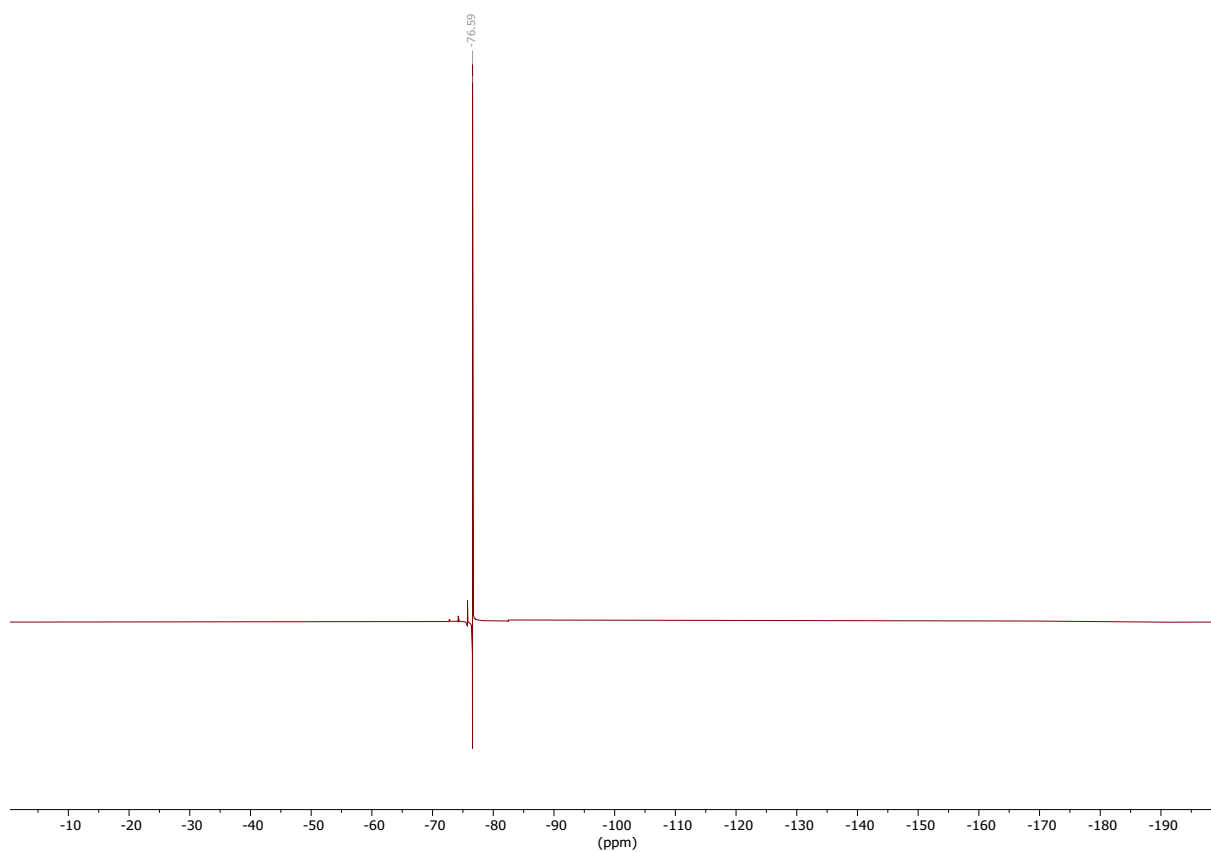

COSY NMR of 1b

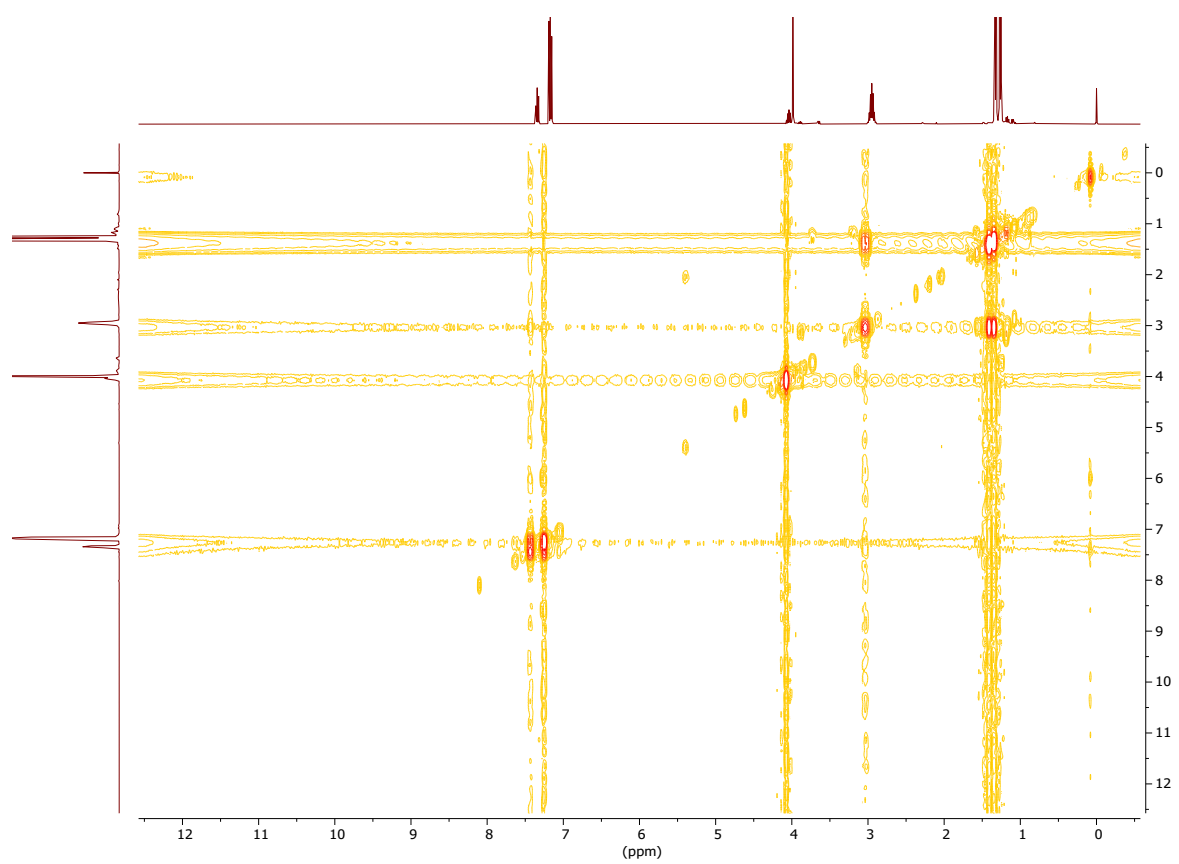

# HSQC NMR of 1b

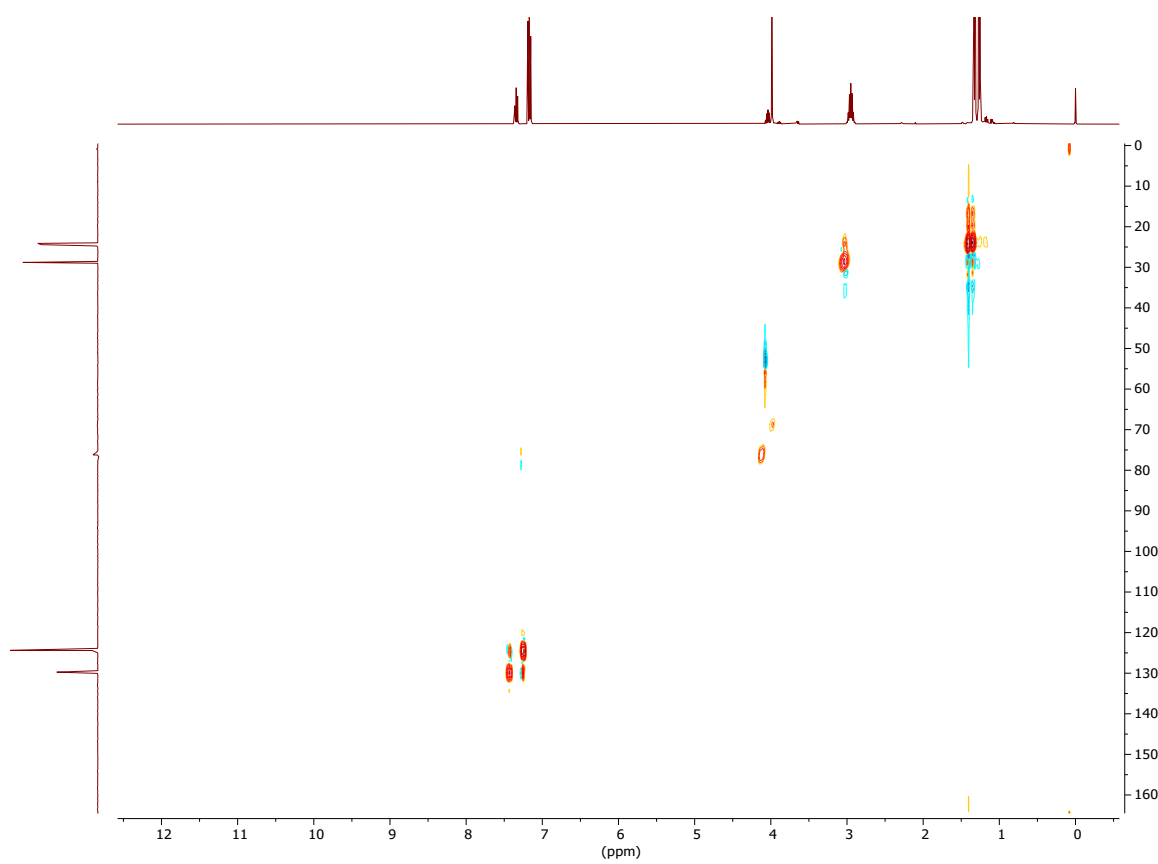



# HMBC NMR of 1b

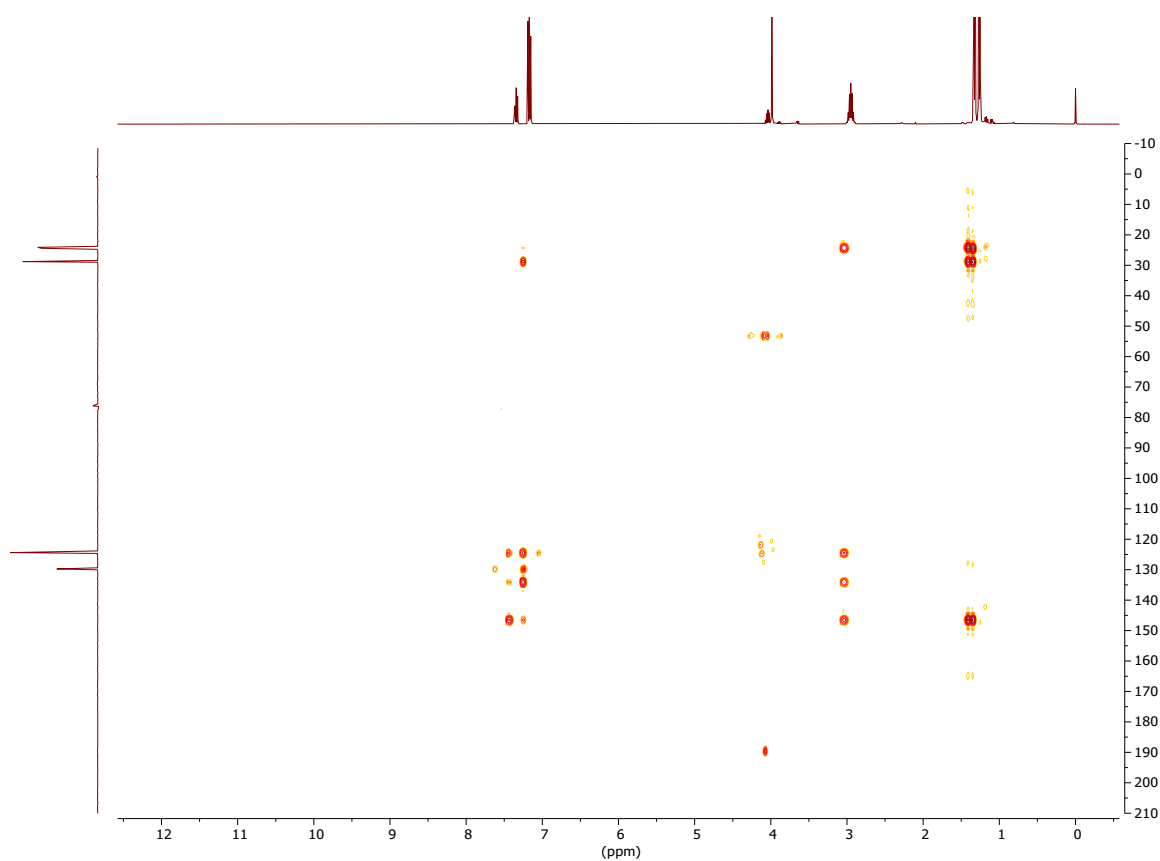

$^1\text{H}$  NMR of  $[\text{Au}(\text{IPr}^{\text{Cl}})(\text{OCH}(\text{CF}_3)_2)]$  (**1c**)

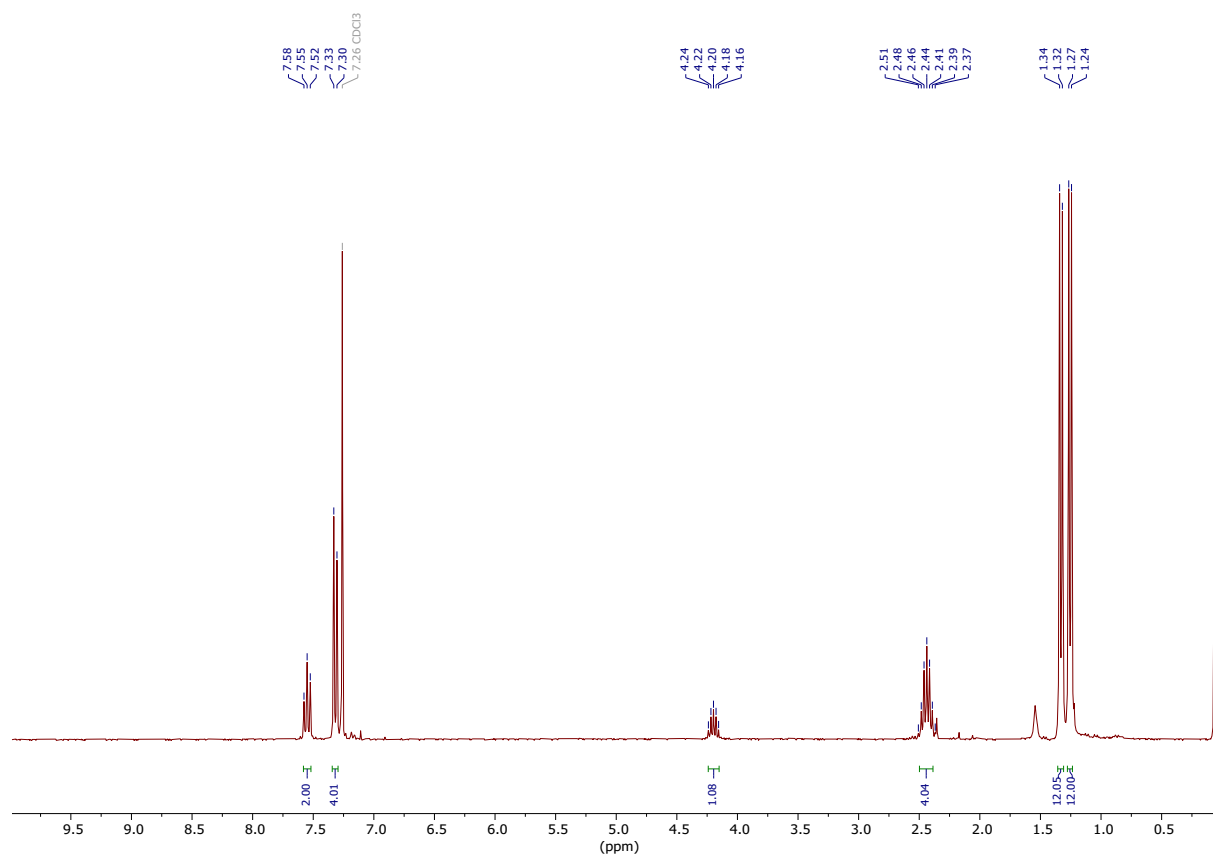

**<sup>13</sup>C NMR of 1c**

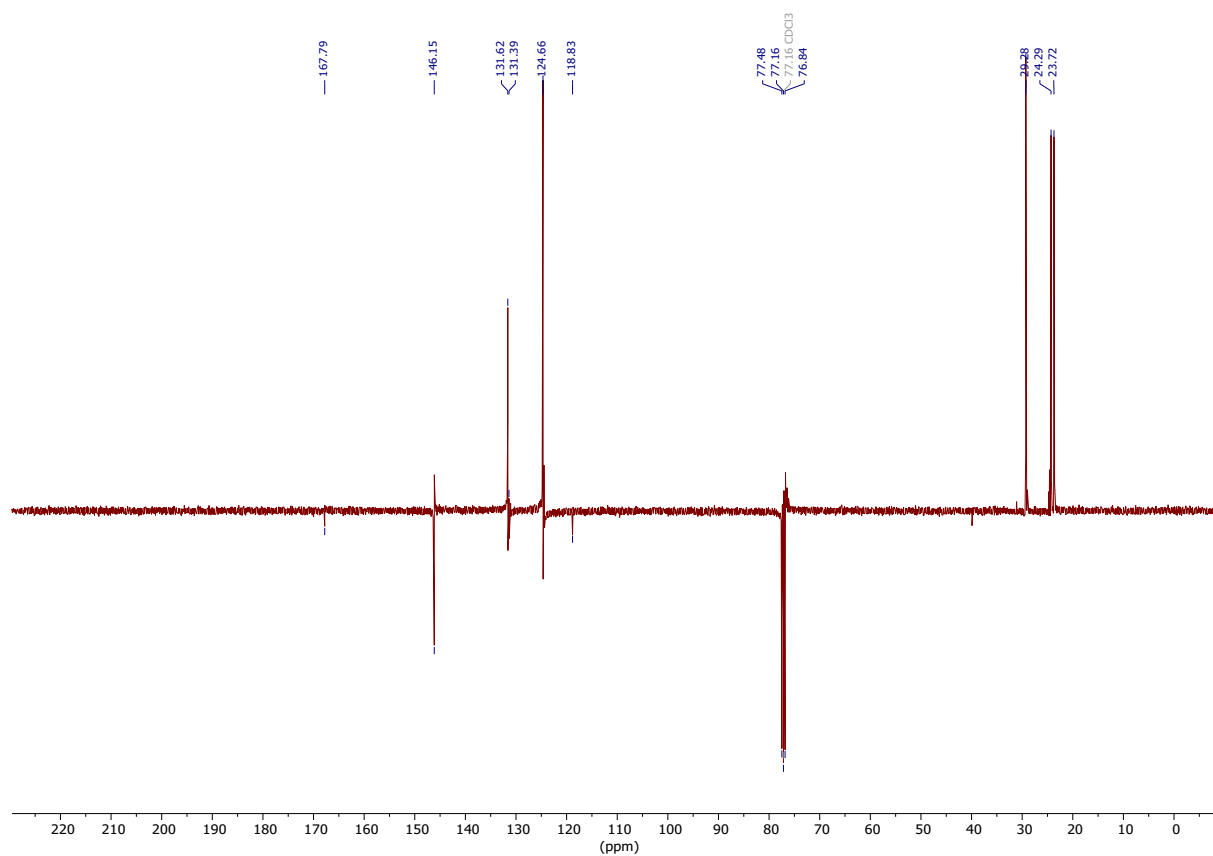

**$^{19}\text{F}$  NMR of 1c**

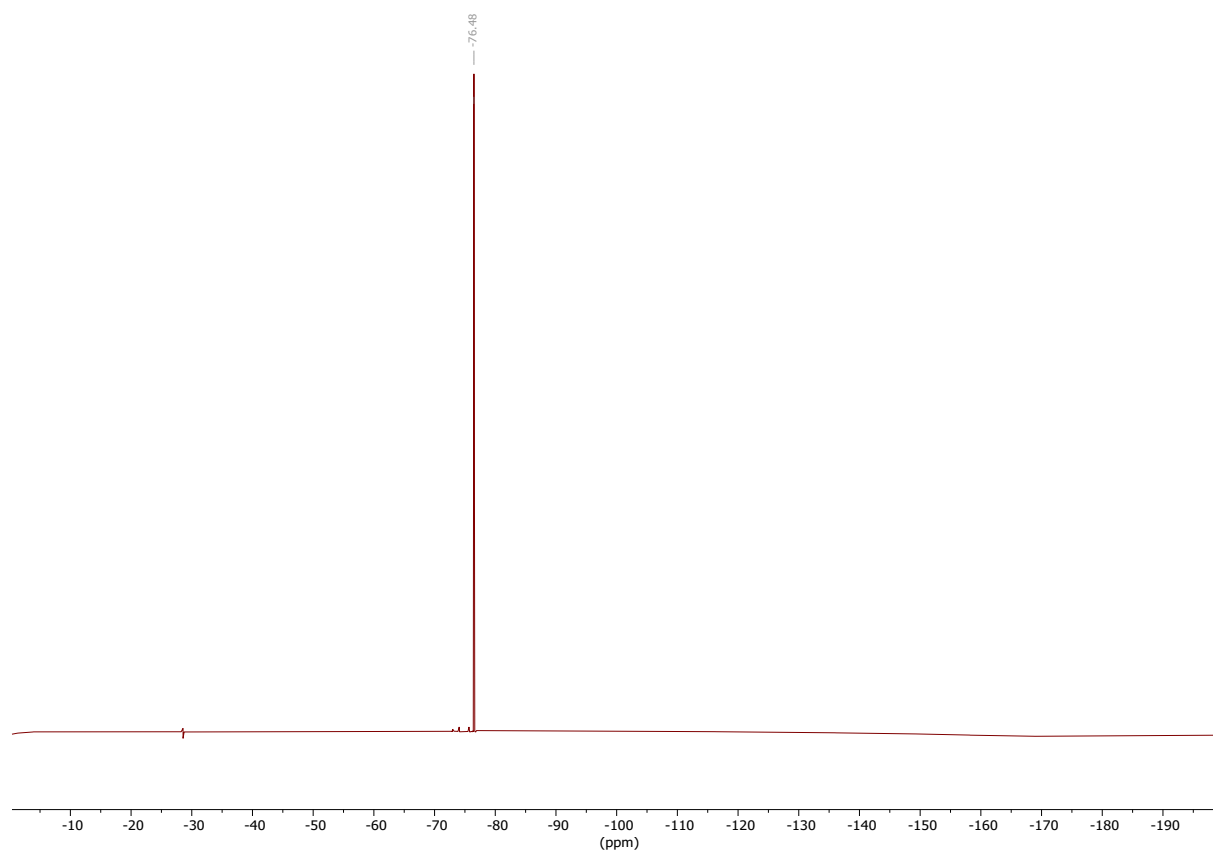

COSY NMR of 1c

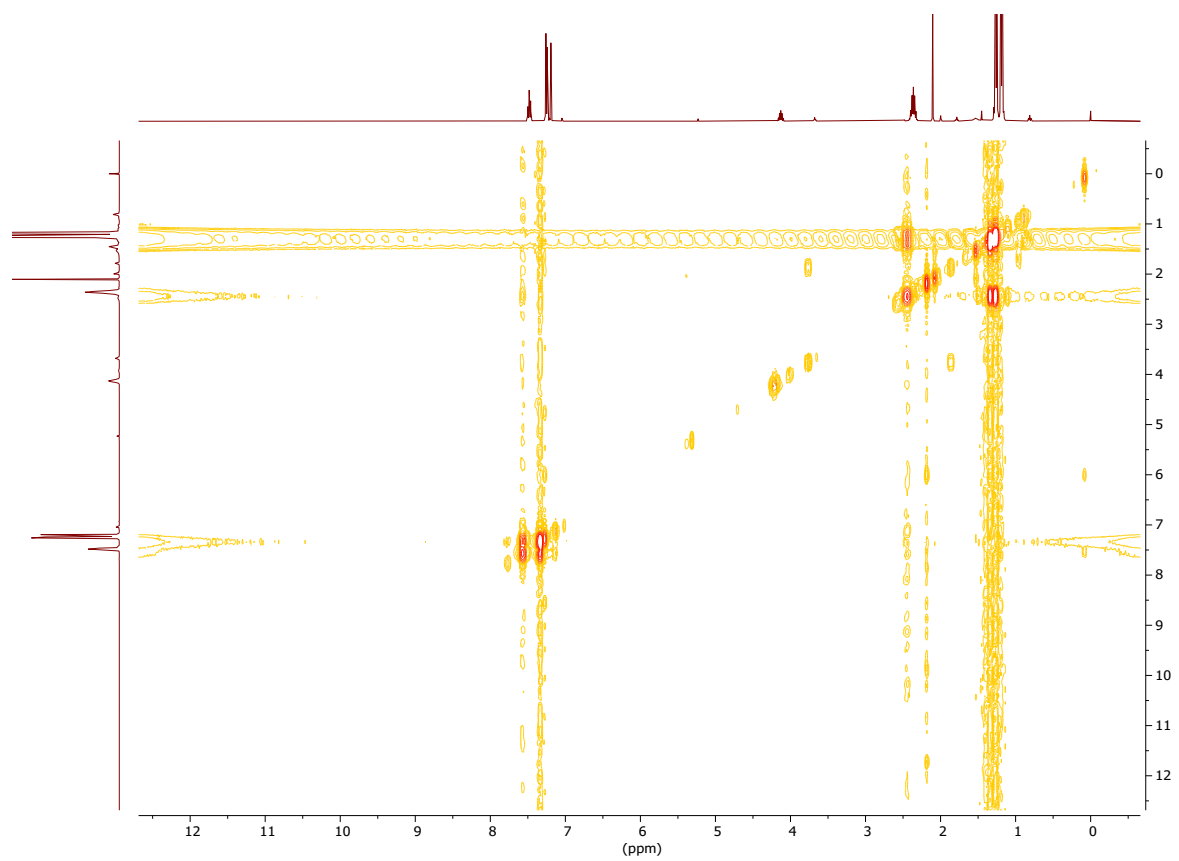

# HSQC NMR of 1c

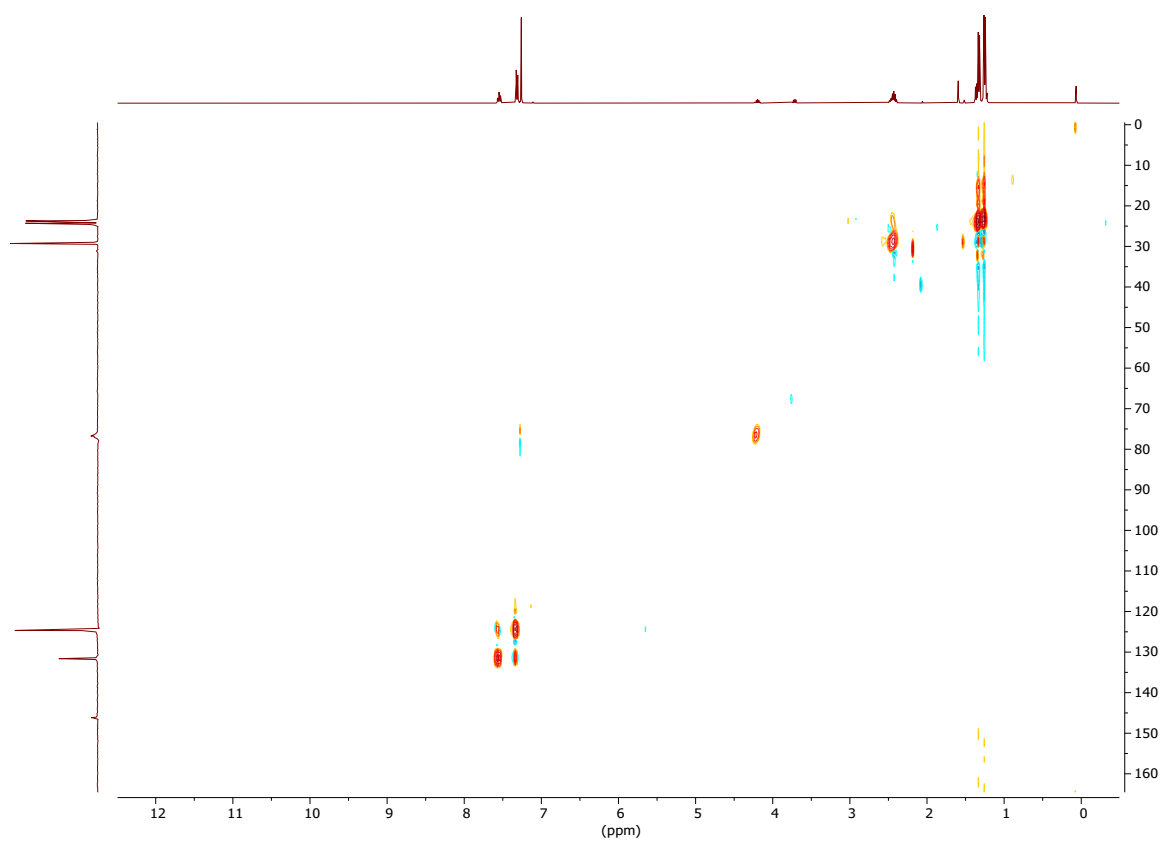

# HMBC NMR of 1c

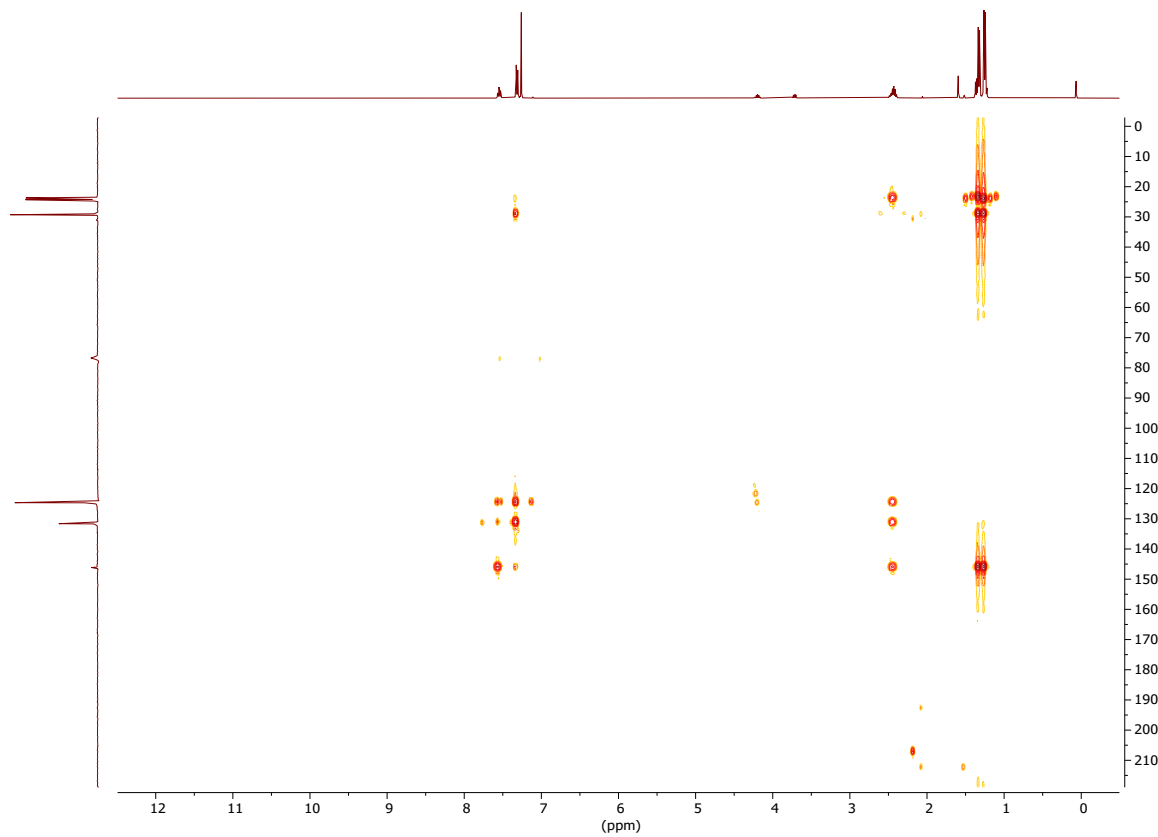

$^1\text{H}$  NMR of  $[\text{Au}(\text{IPr}^{\text{Me}})(\text{OCH}(\text{CF}_3)_2)]$  (1d)

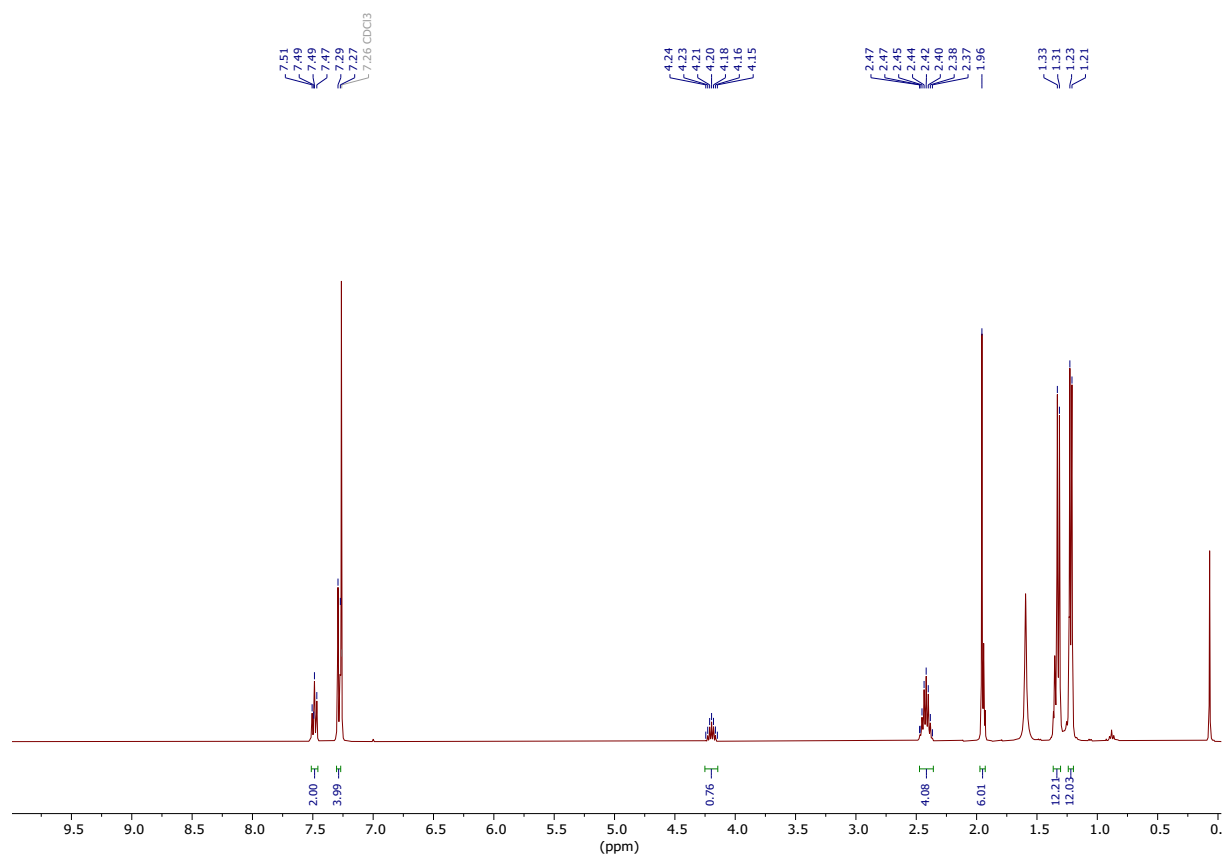



**<sup>13</sup>C NMR of 1d**

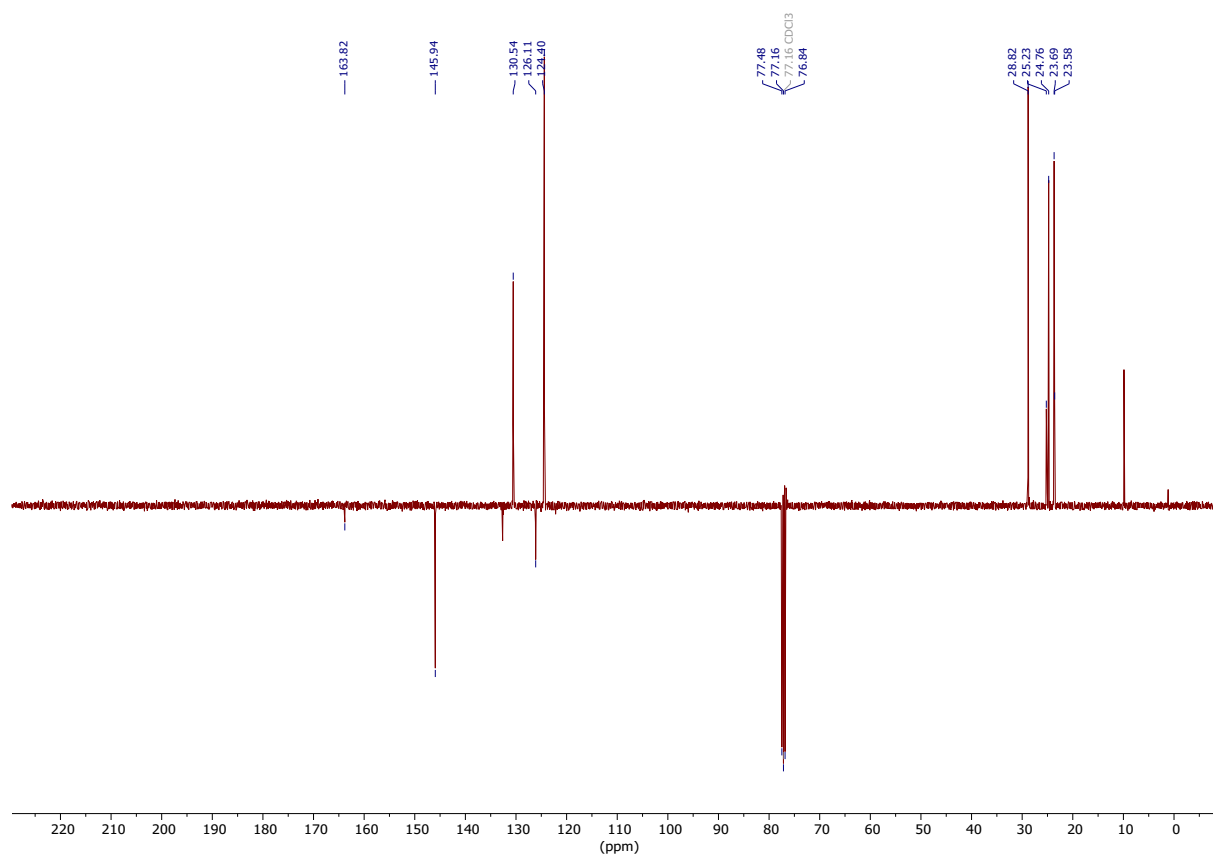

**$^{19}\text{F}$  NMR of 1d**

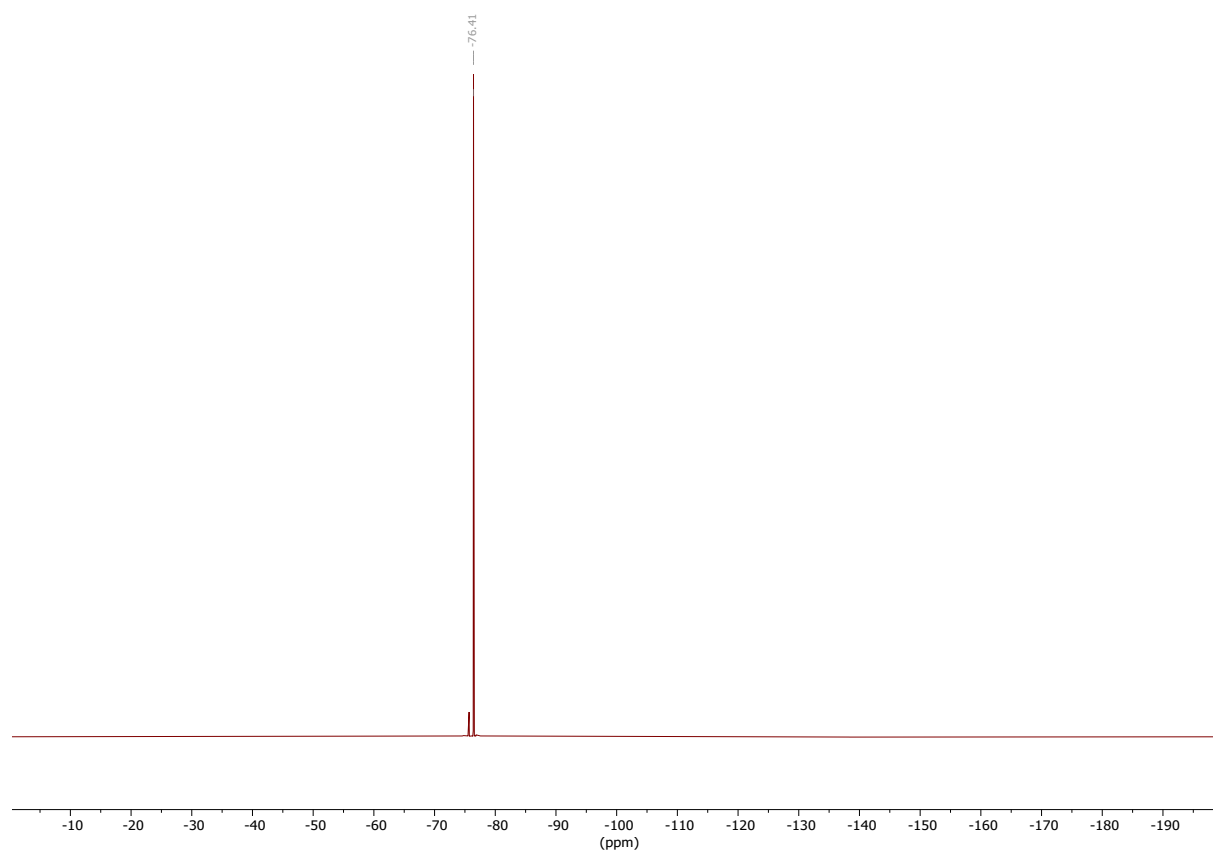

COSY NMR of 1d

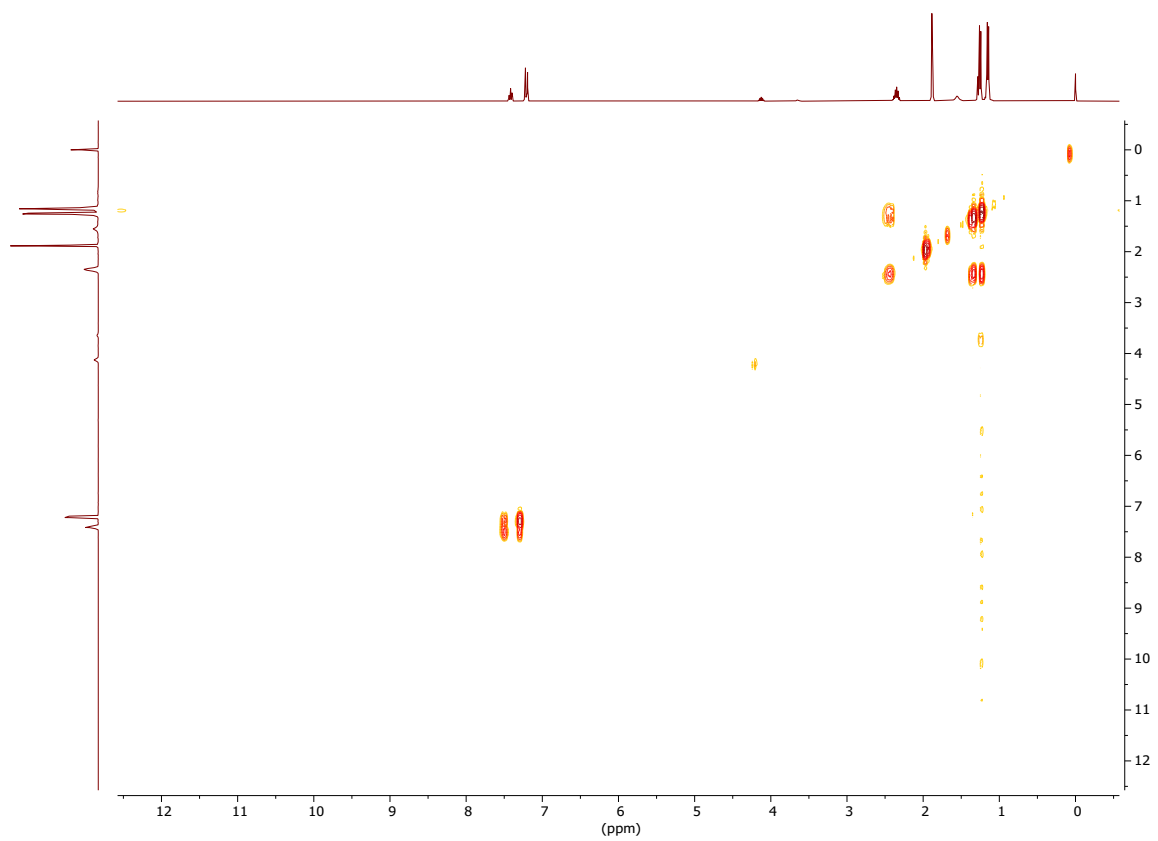

# HSQC NMR of 1d

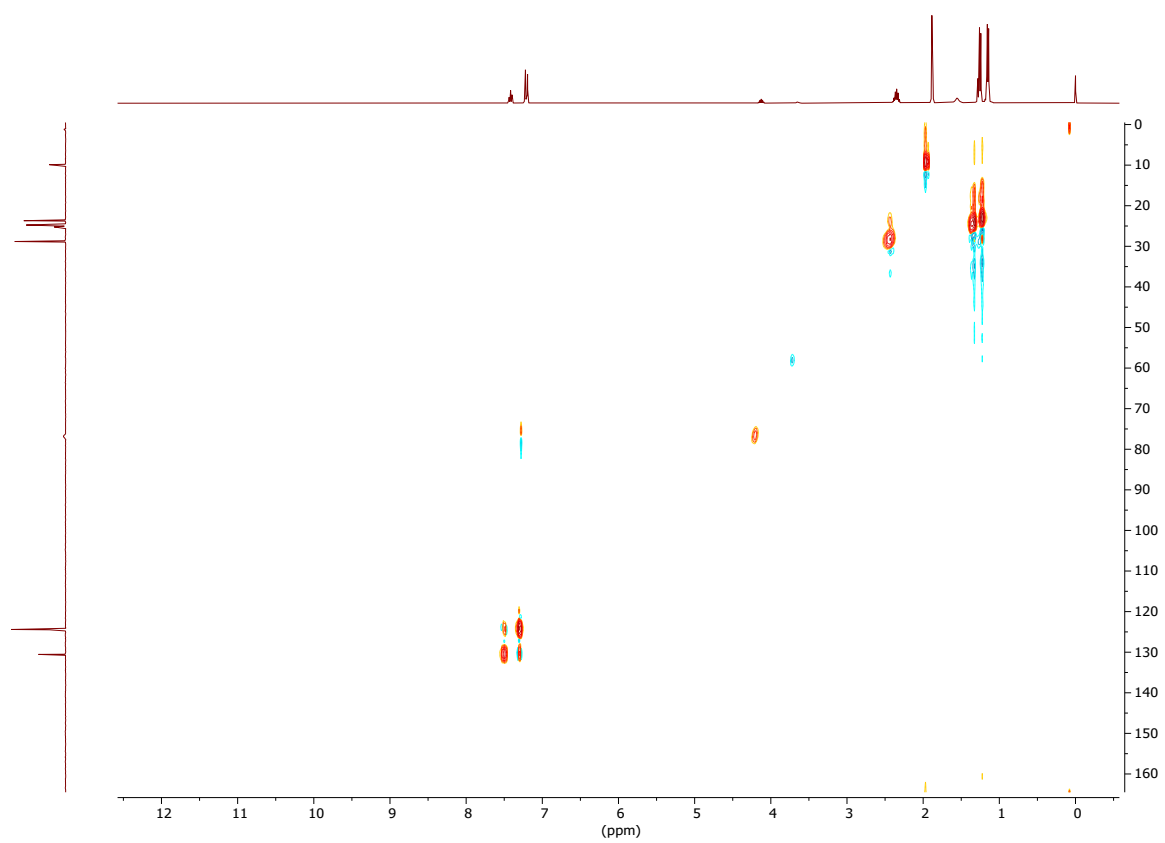

# HMBC NMR of 1d

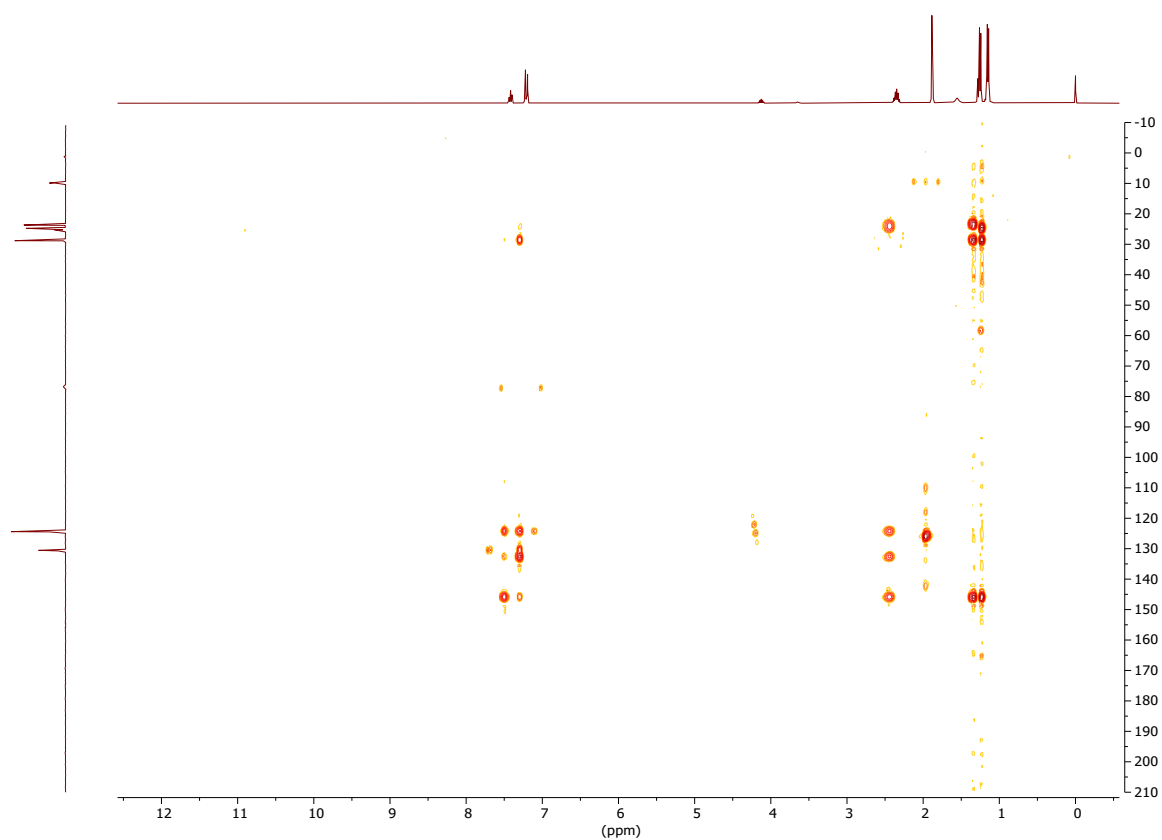

$^1\text{H}$  NMR of  $[\text{Au}(\text{BIAN-IPr})(\text{OCH}(\text{CF}_3)_2)]$  (1e)

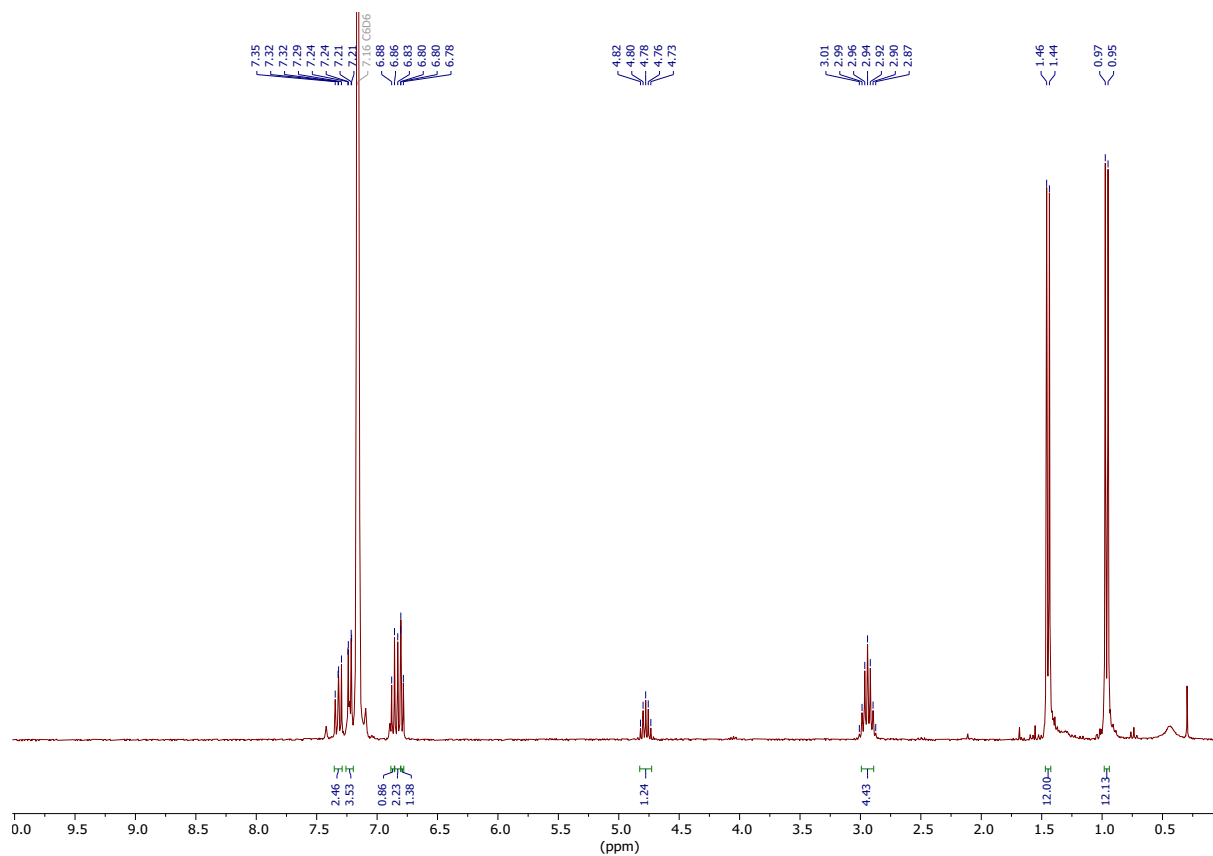

# <sup>13</sup>C NMR of 1e

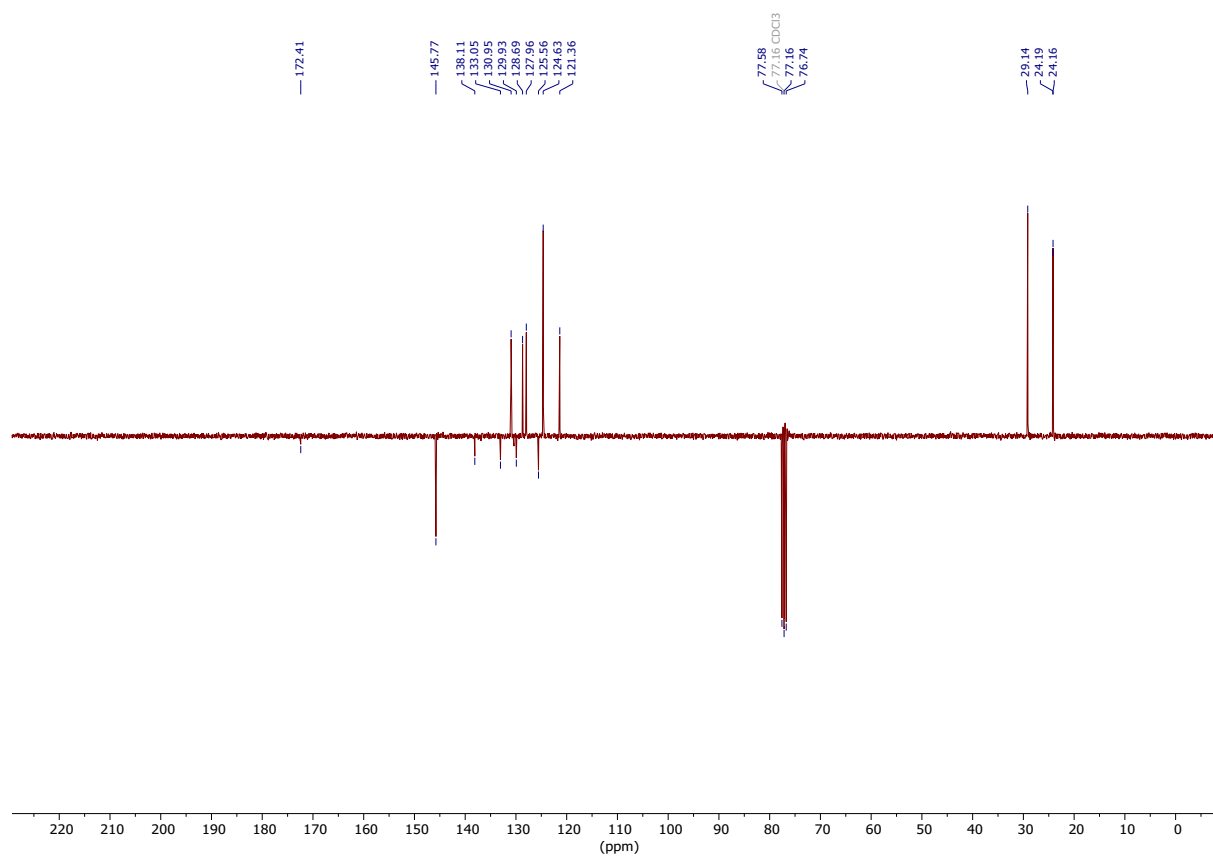

**$^{19}\text{F}$  NMR of 1e**

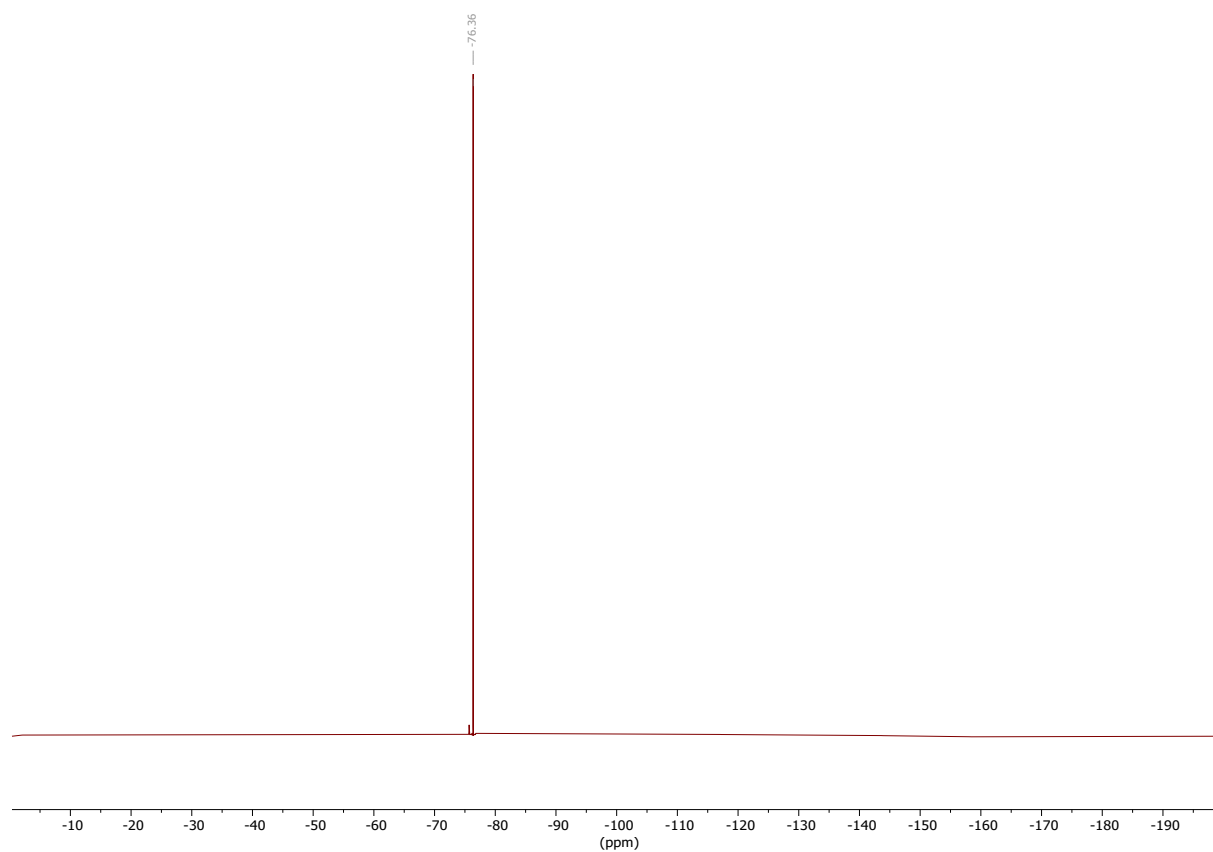



COSY NMR of 1e

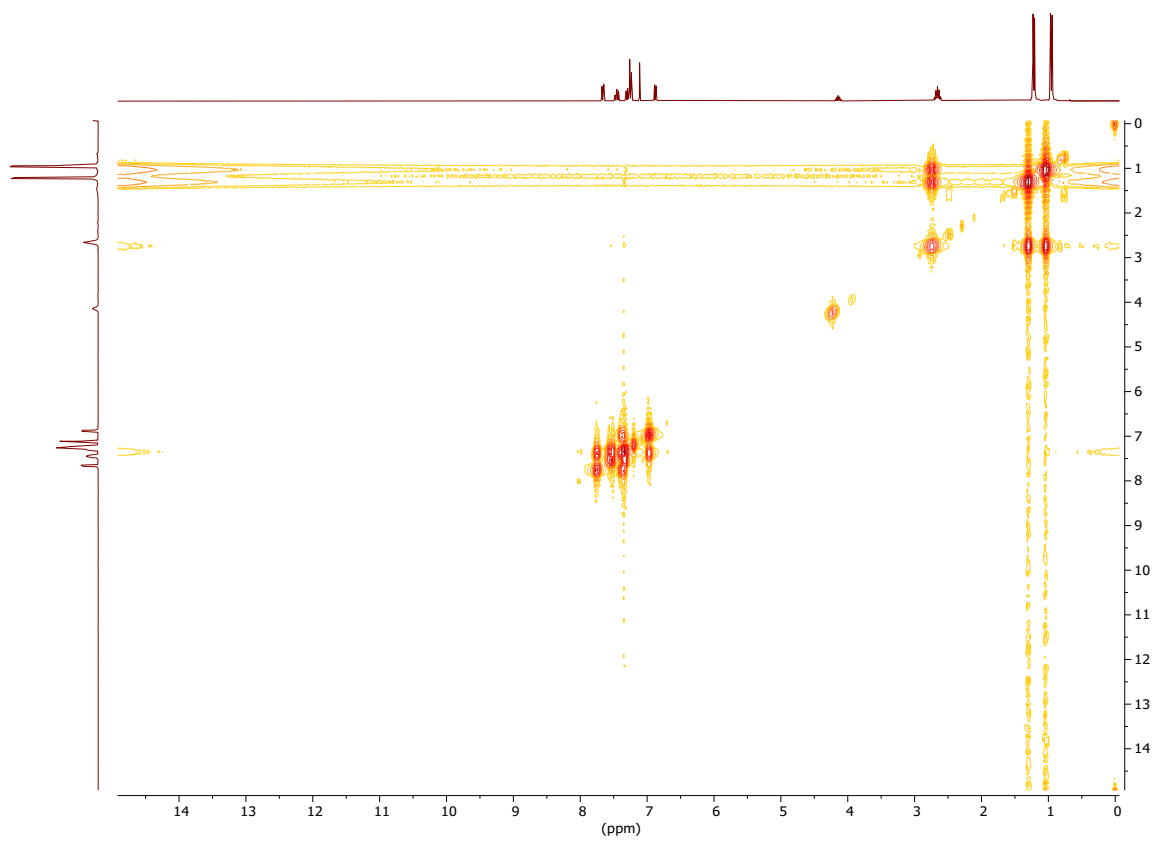

# HSQC NMR of 1e

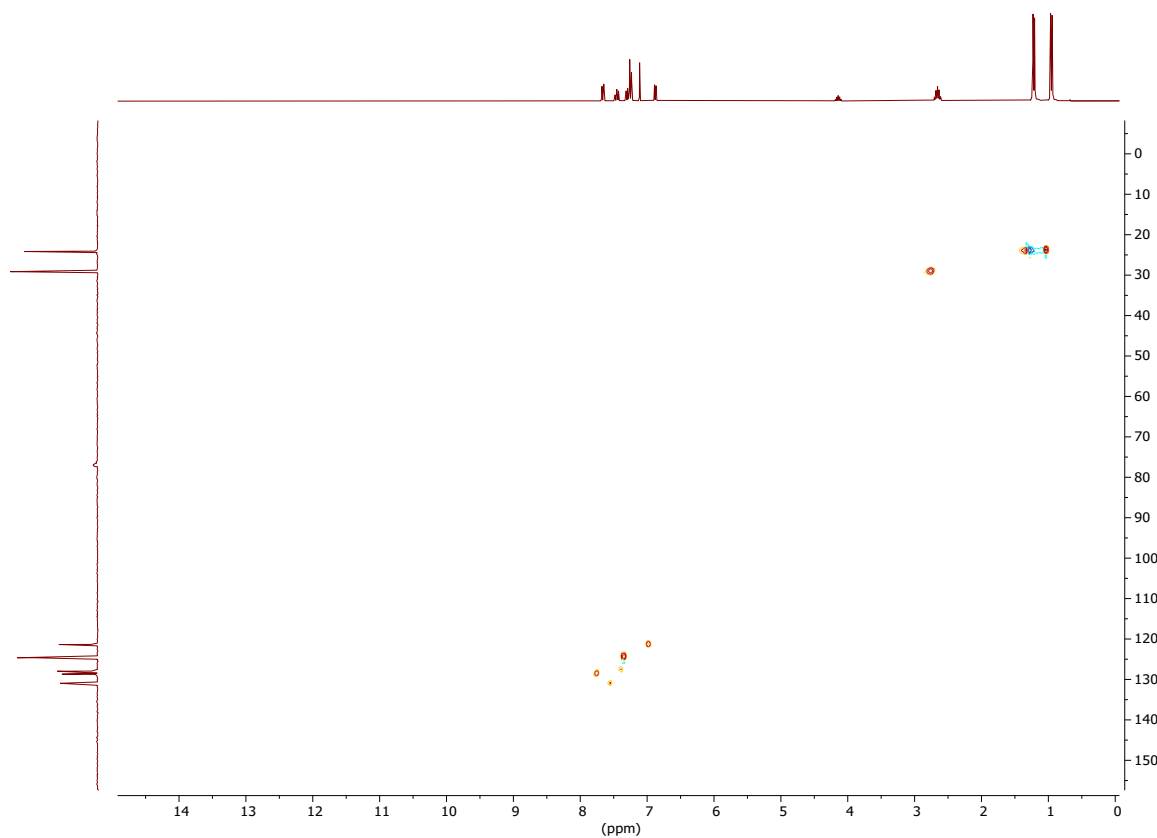

$^1\text{H}$  NMR of  $[\text{Au}(\text{IPr}^*)(\text{OCH}(\text{CF}_3)_2)]$  (**1f**)

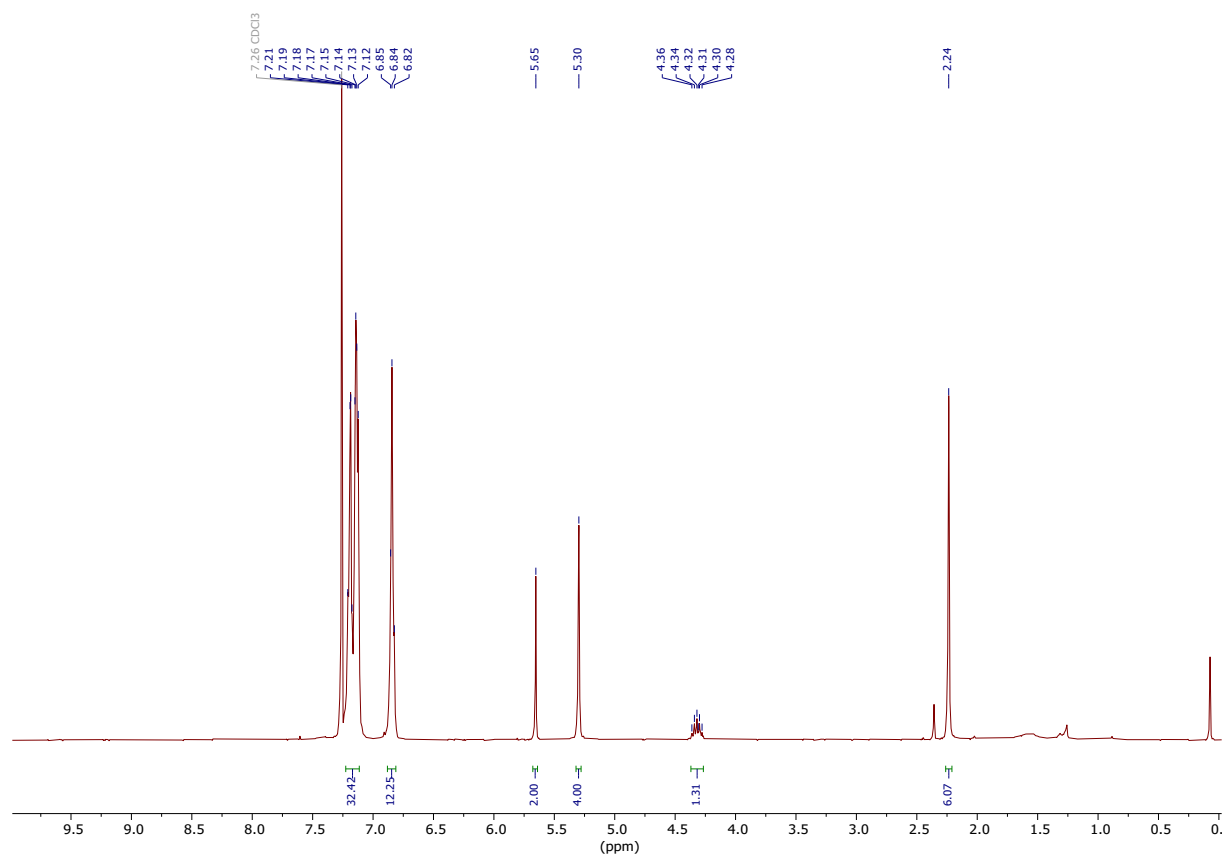

**<sup>13</sup>C NMR of 1f**

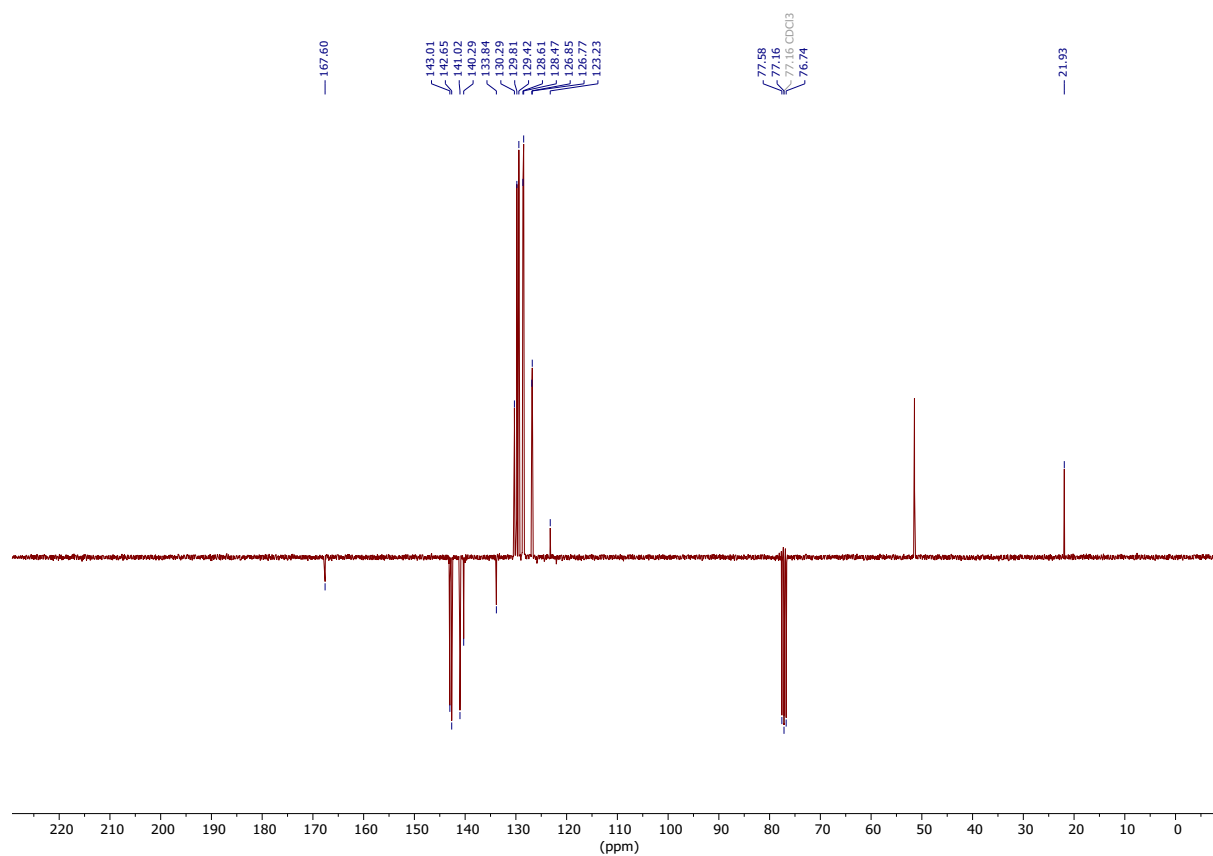

**$^{19}\text{F}$  NMR of 1f**

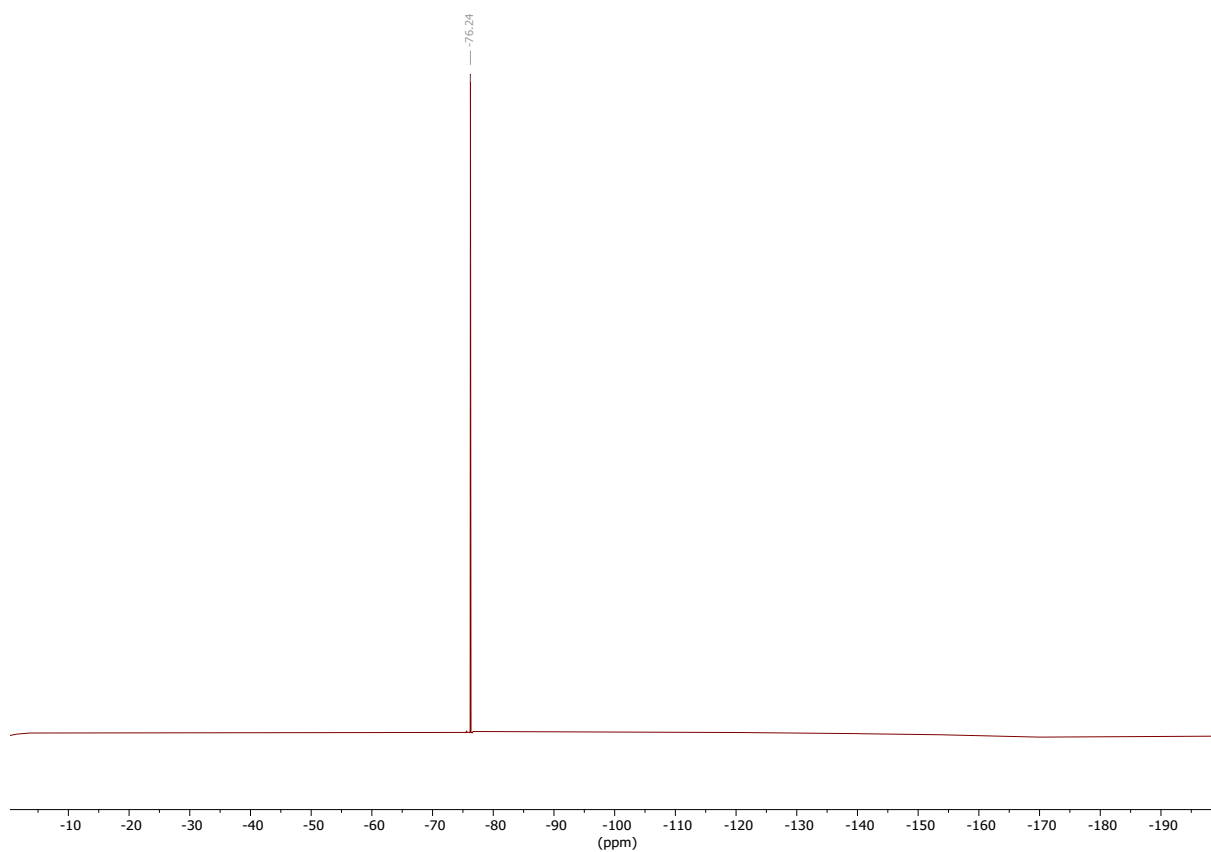

COSY NMR of 1f

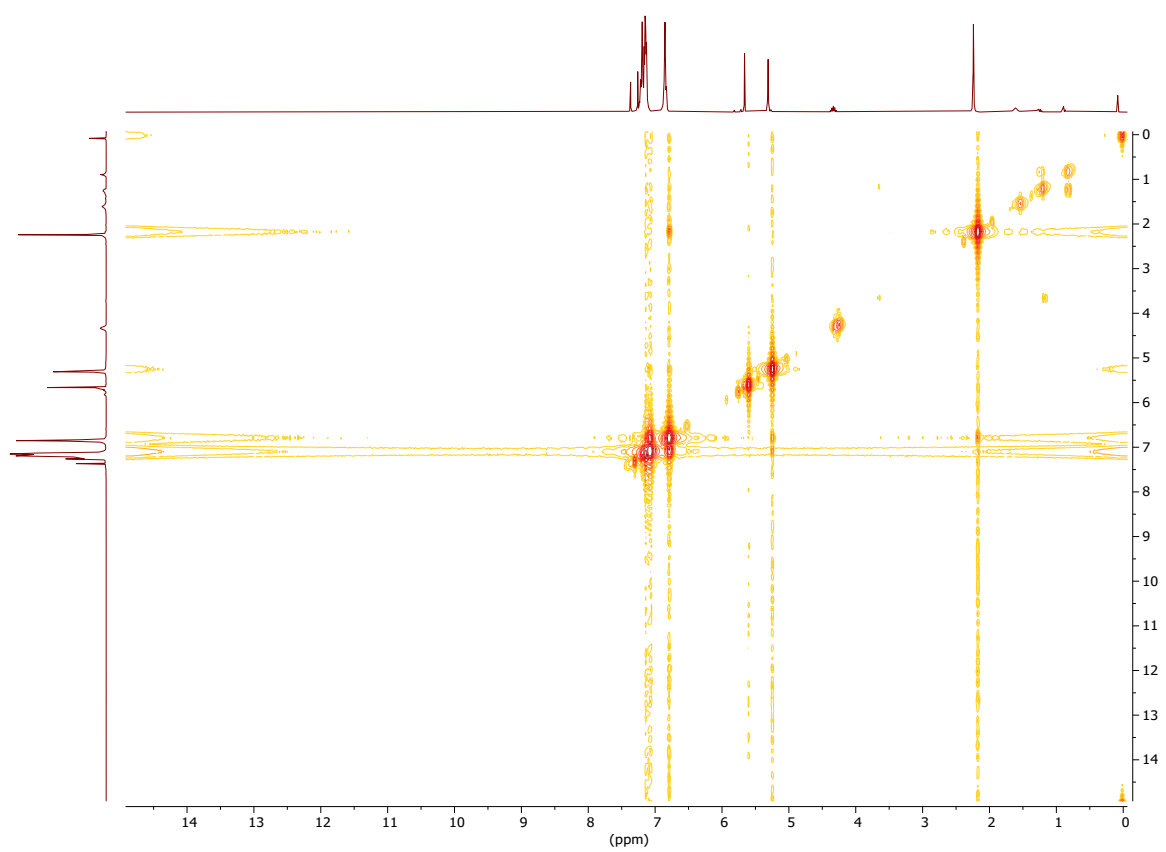

# HSQC NMR of 1f

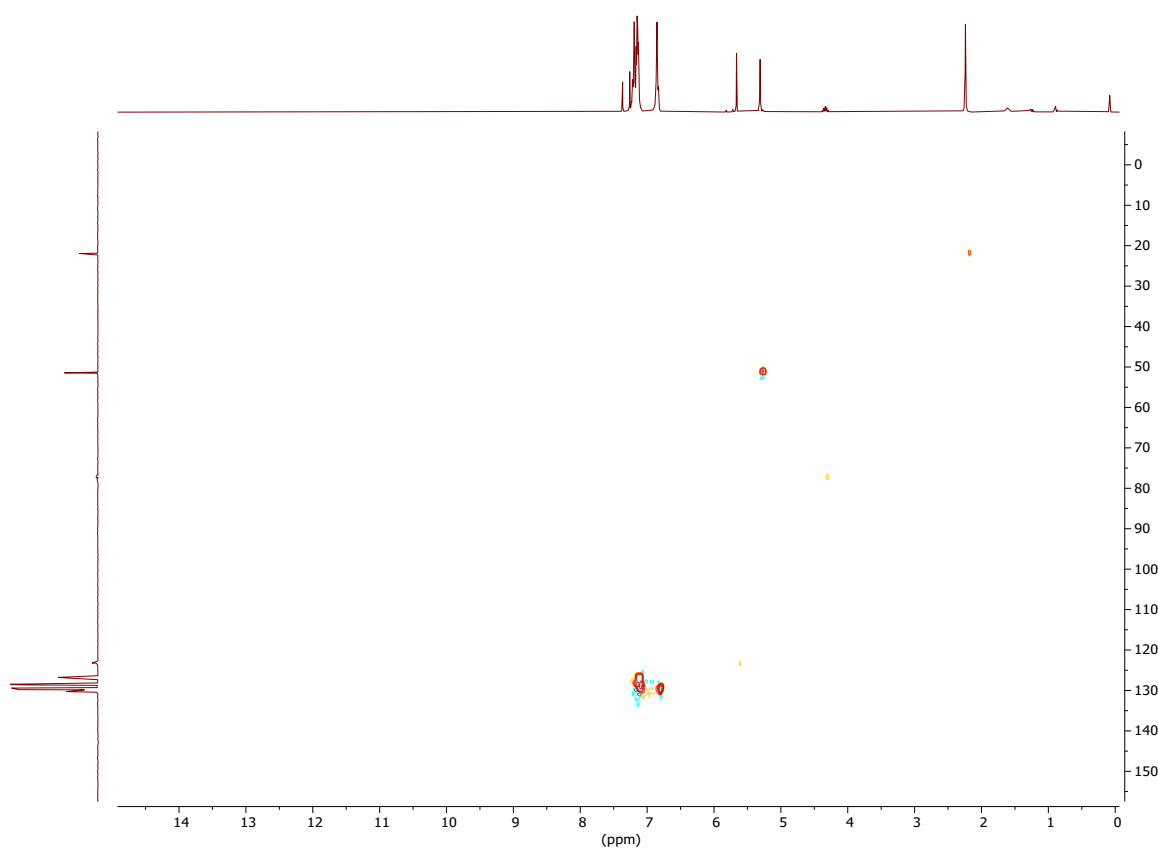

# HMBC NMR of 1f

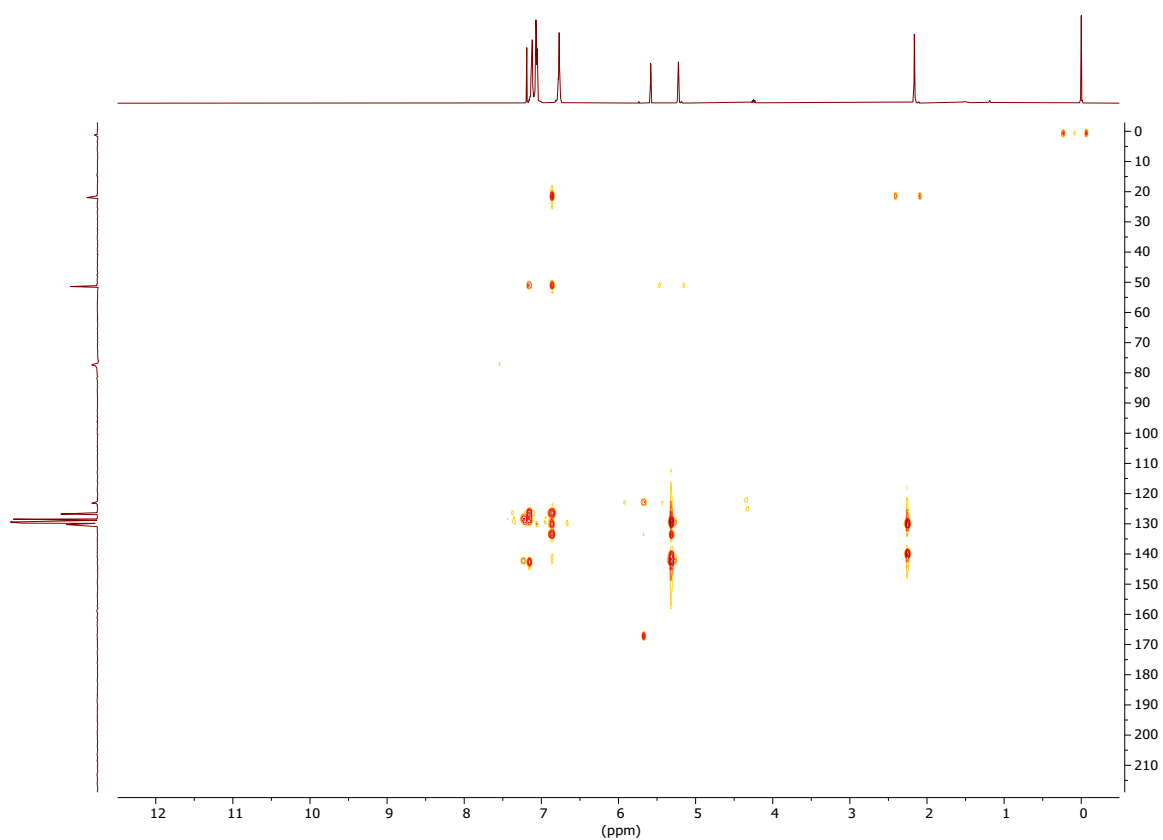



<sup>1</sup>H NMR of [Au(IPent)(OCH(CF<sub>3</sub>)<sub>2</sub>)] (1g)

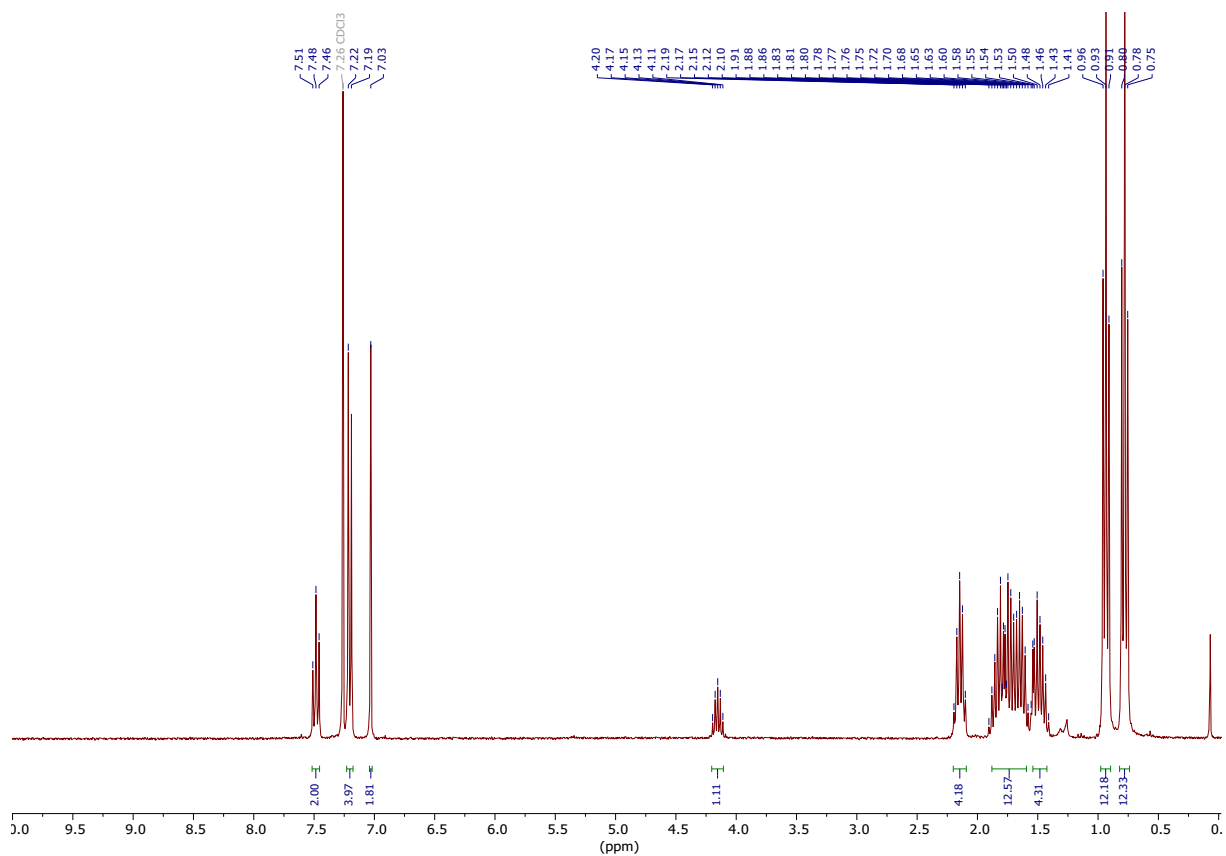

**<sup>13</sup>C NMR of 1g**

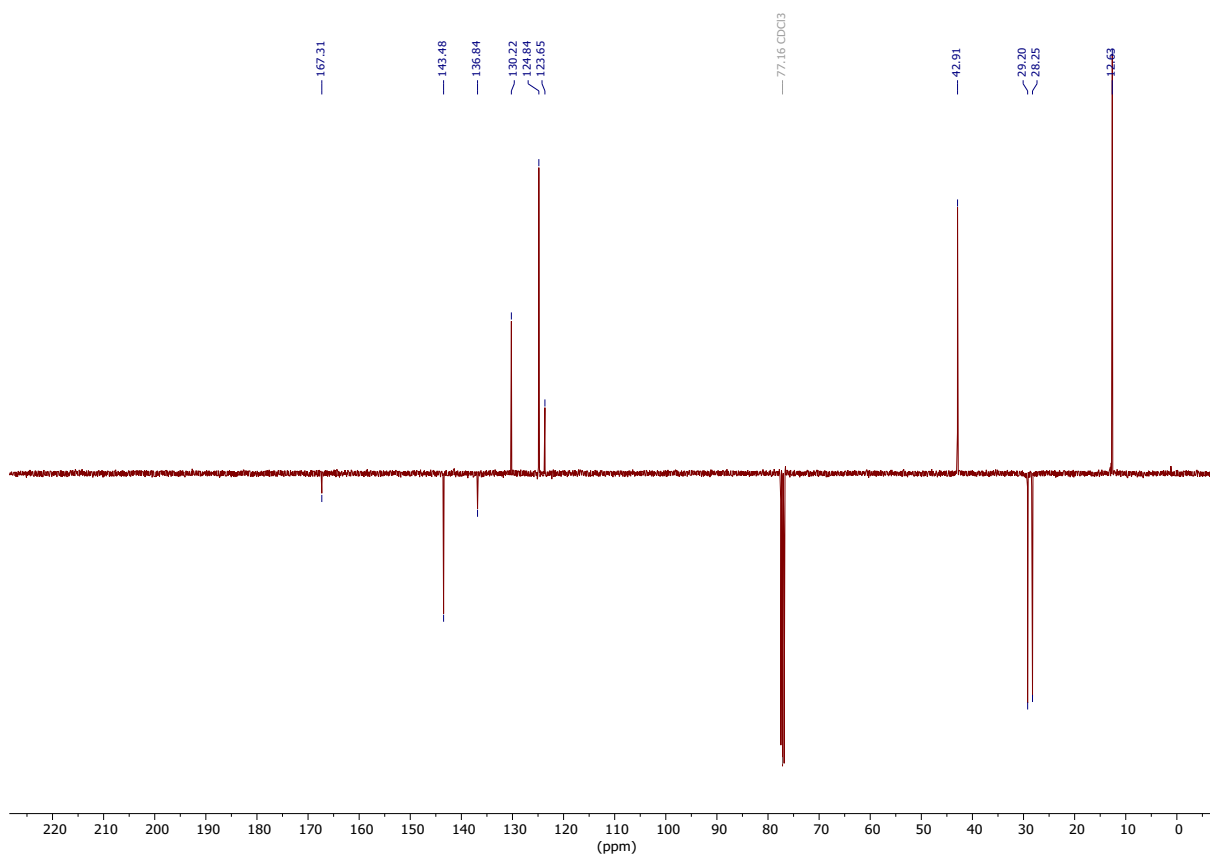

**$^{19}\text{F}$  NMR of 1g**

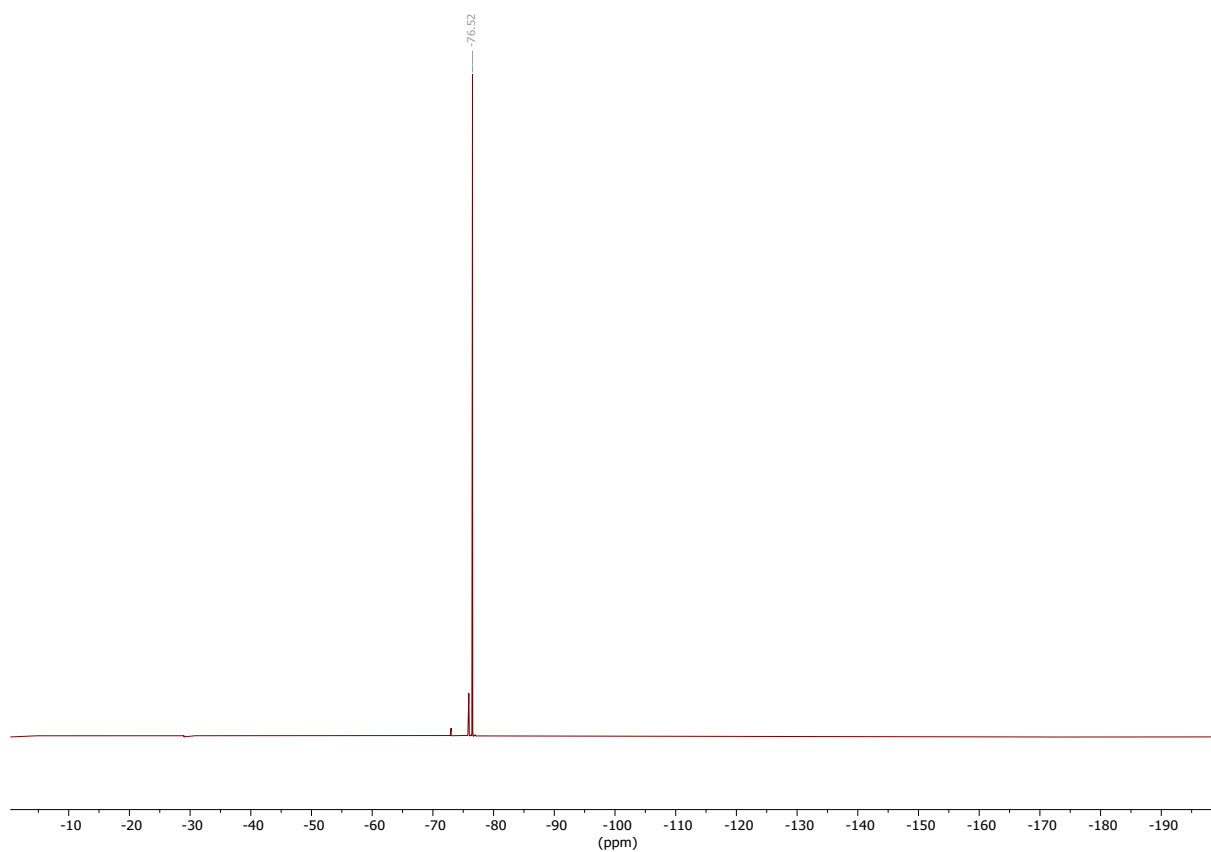

COSY NMR of 1g

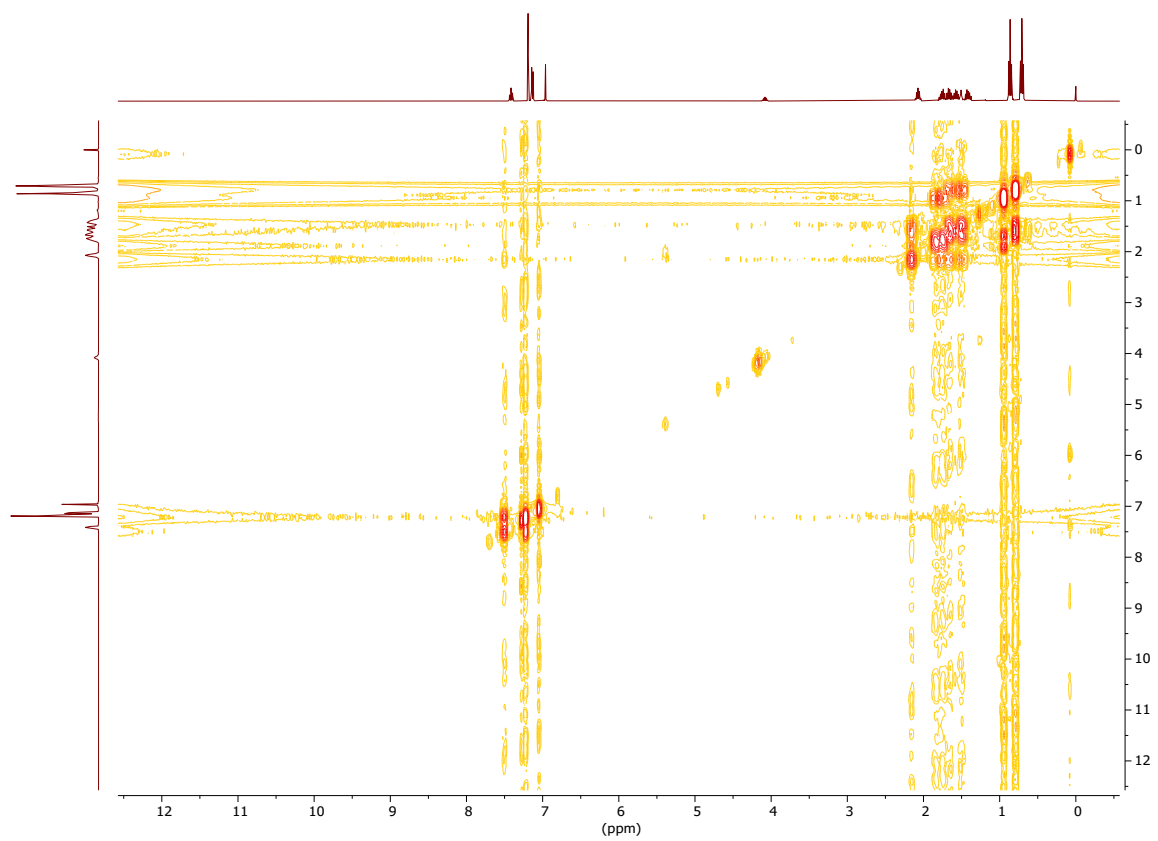

# HSQC NMR of 1g

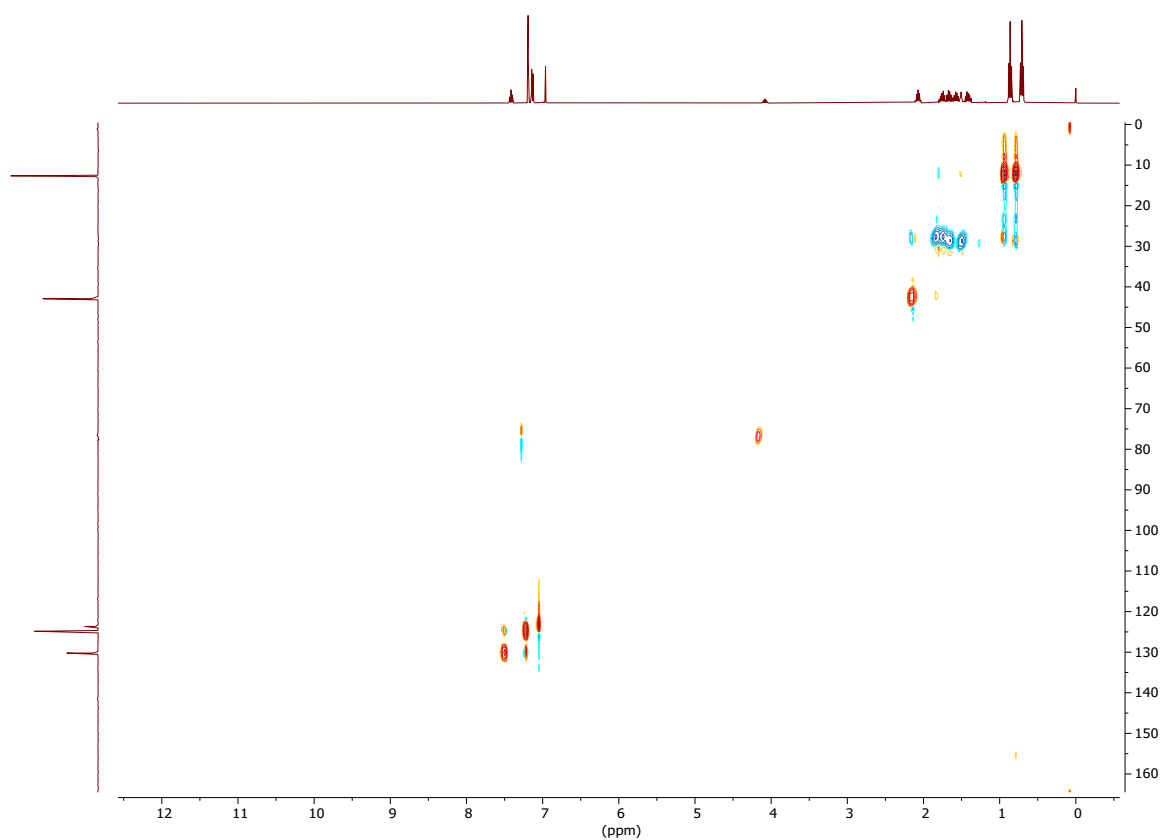

# HMBC NMR of 1g

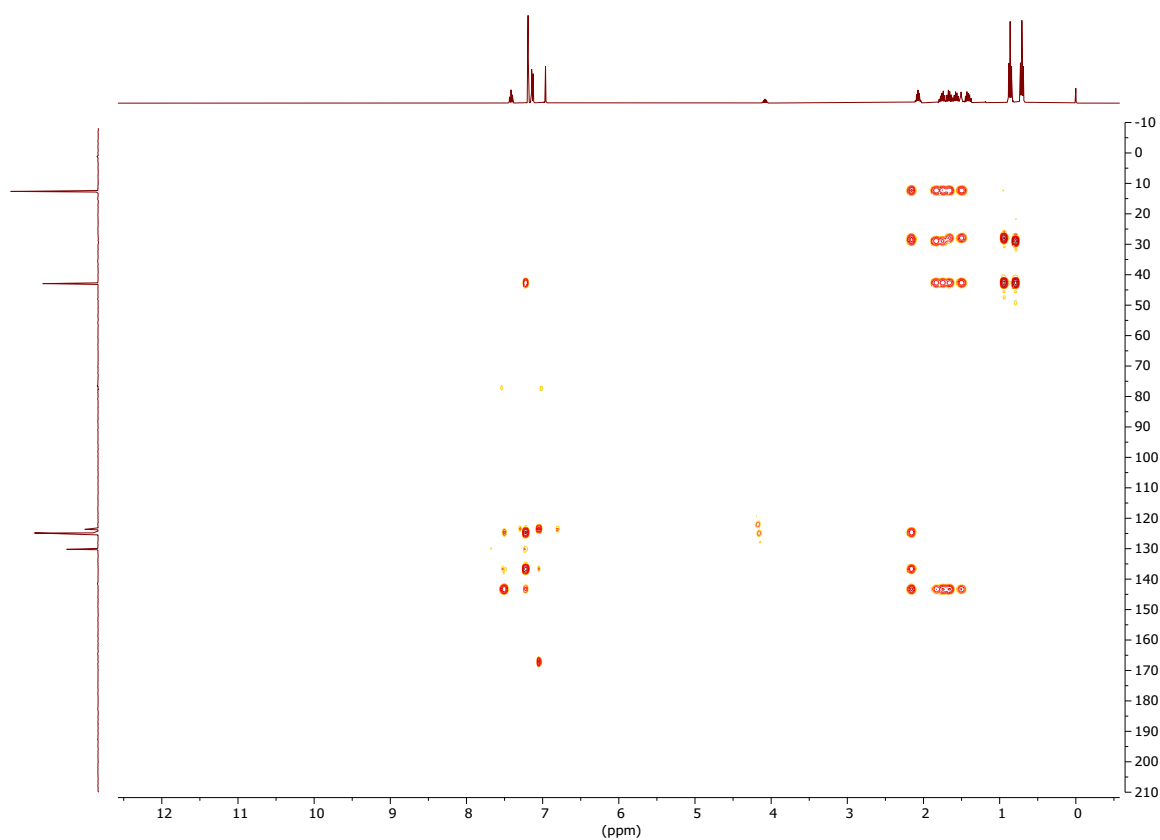

$^1\text{H}$  NMR of  $[\text{Au}(\text{t}^{\text{Bu}})(\text{OCH}(\text{CF}_3)_2)]$  (1h)

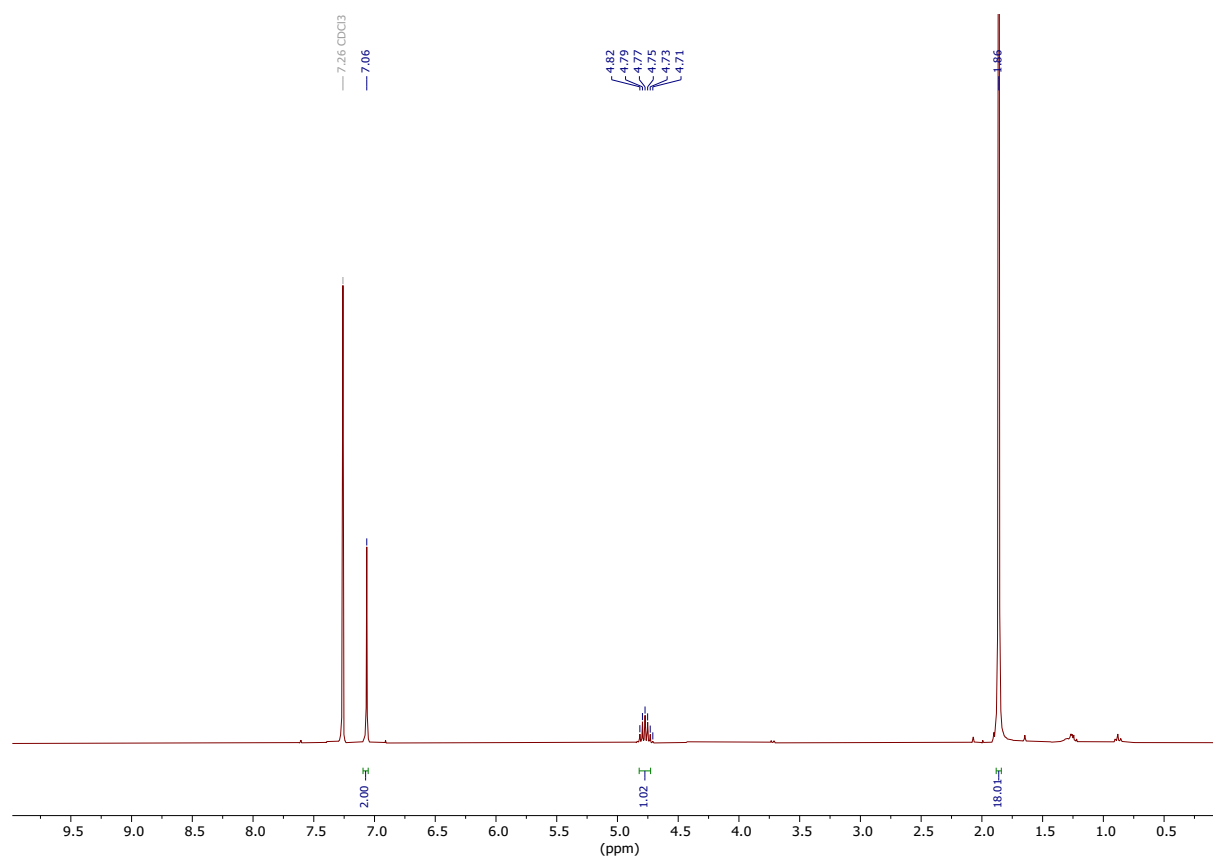

**<sup>13</sup>C NMR of 1h**

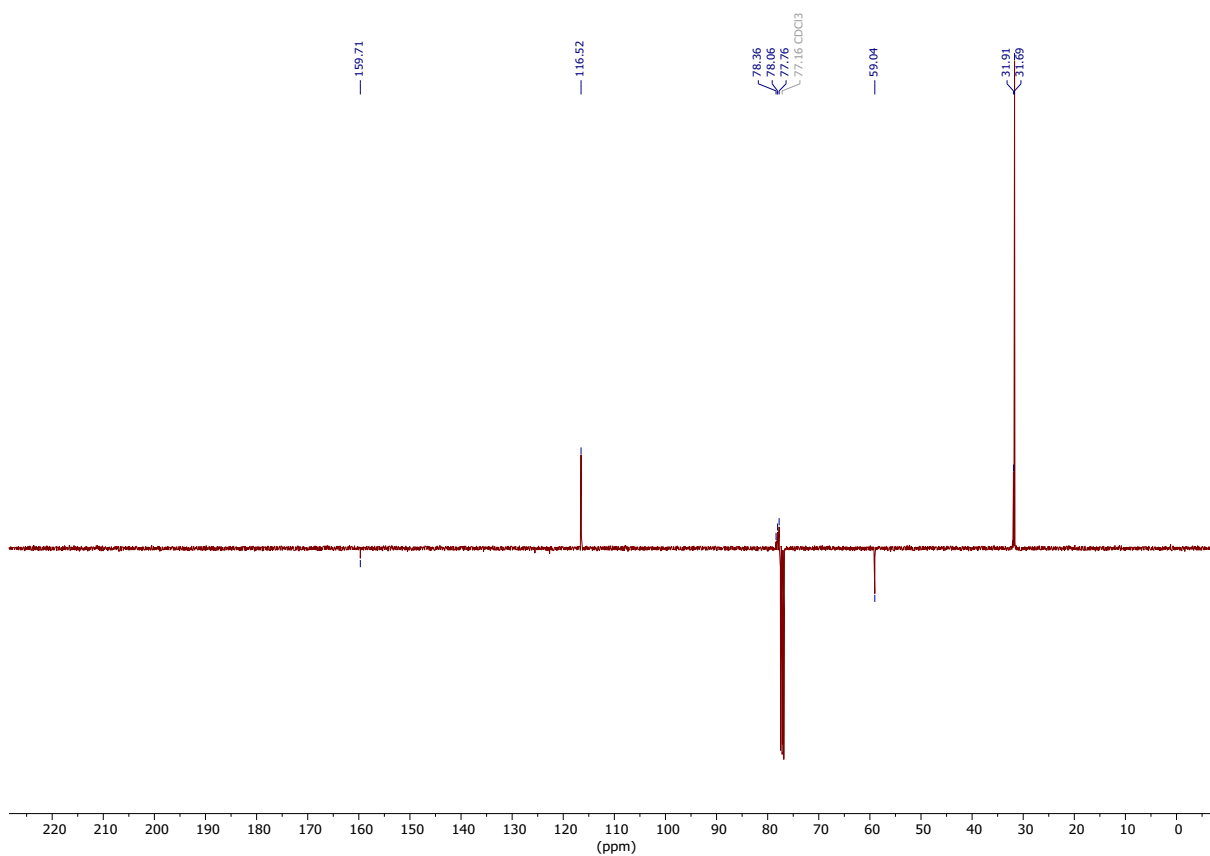



**$^{19}\text{F}$  NMR of 1h**

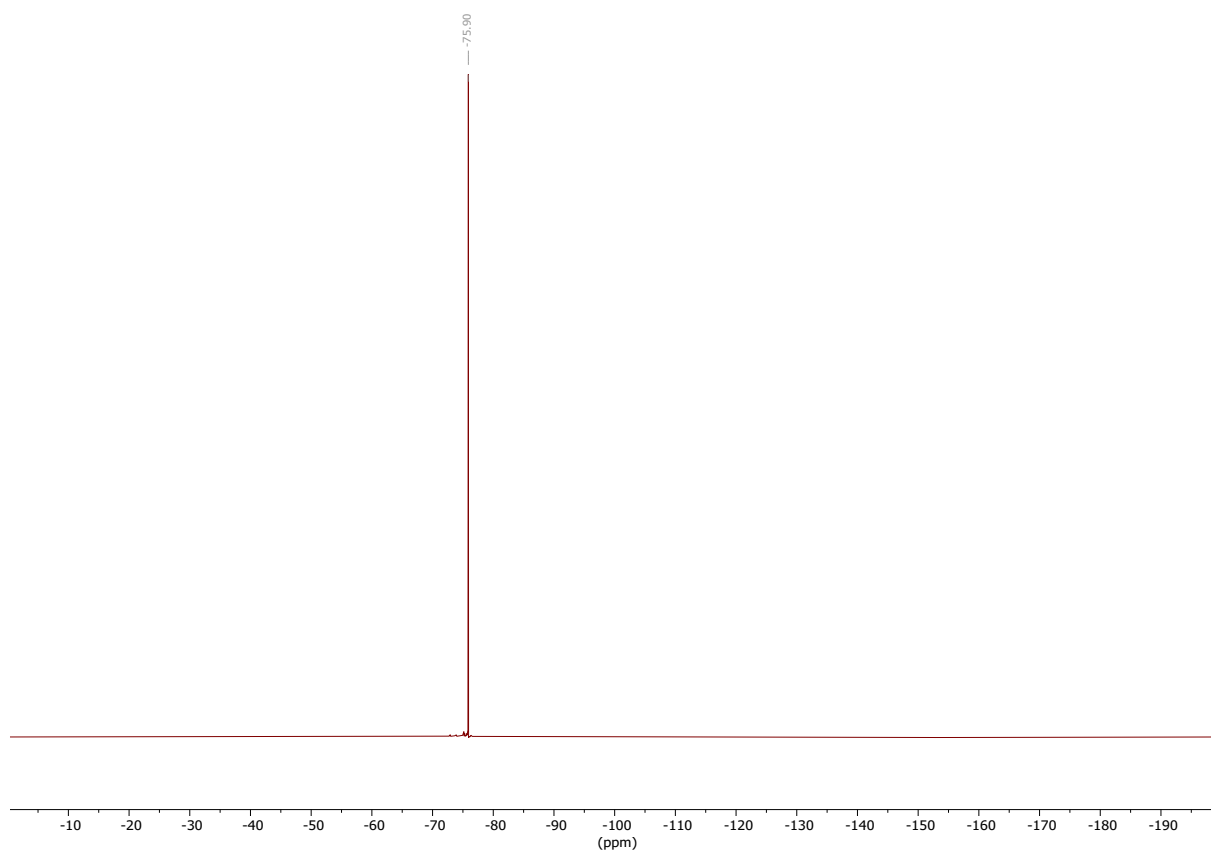

COSY NMR of 1h

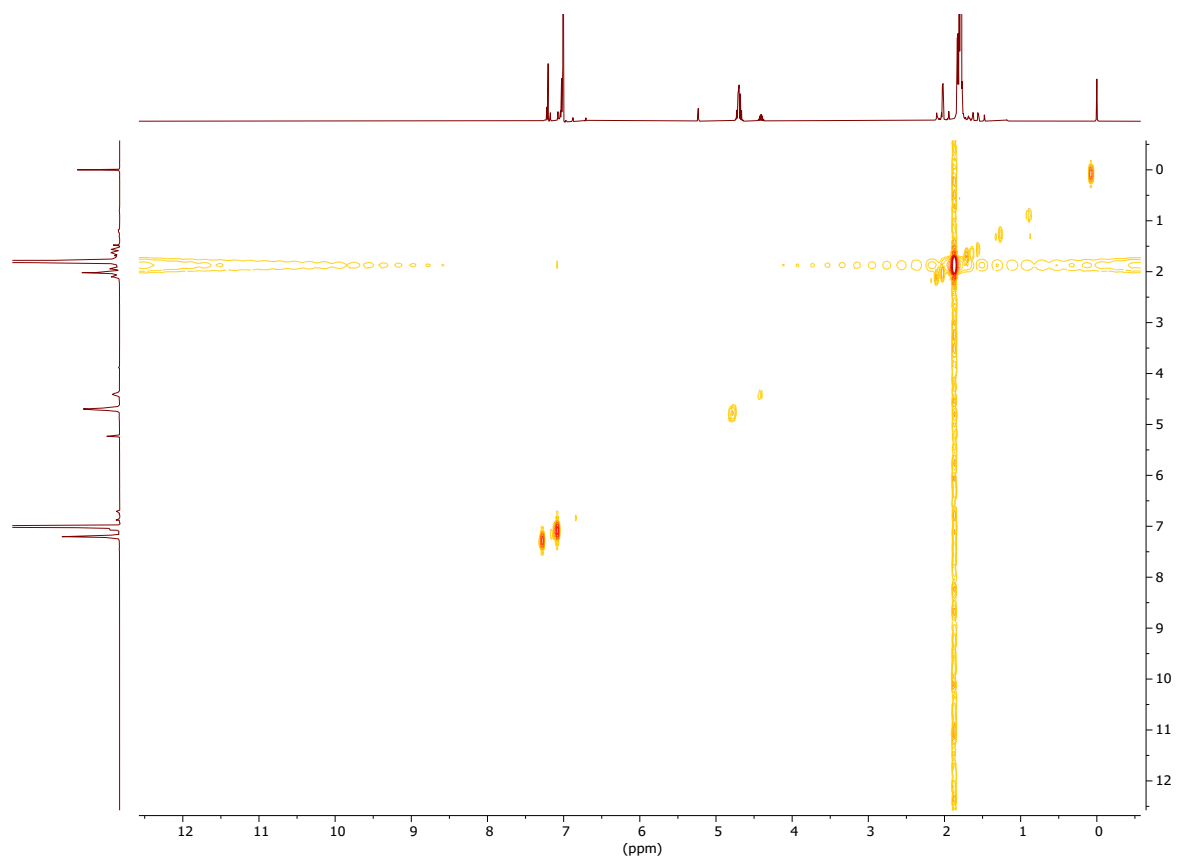

# HSQC NMR of 1h

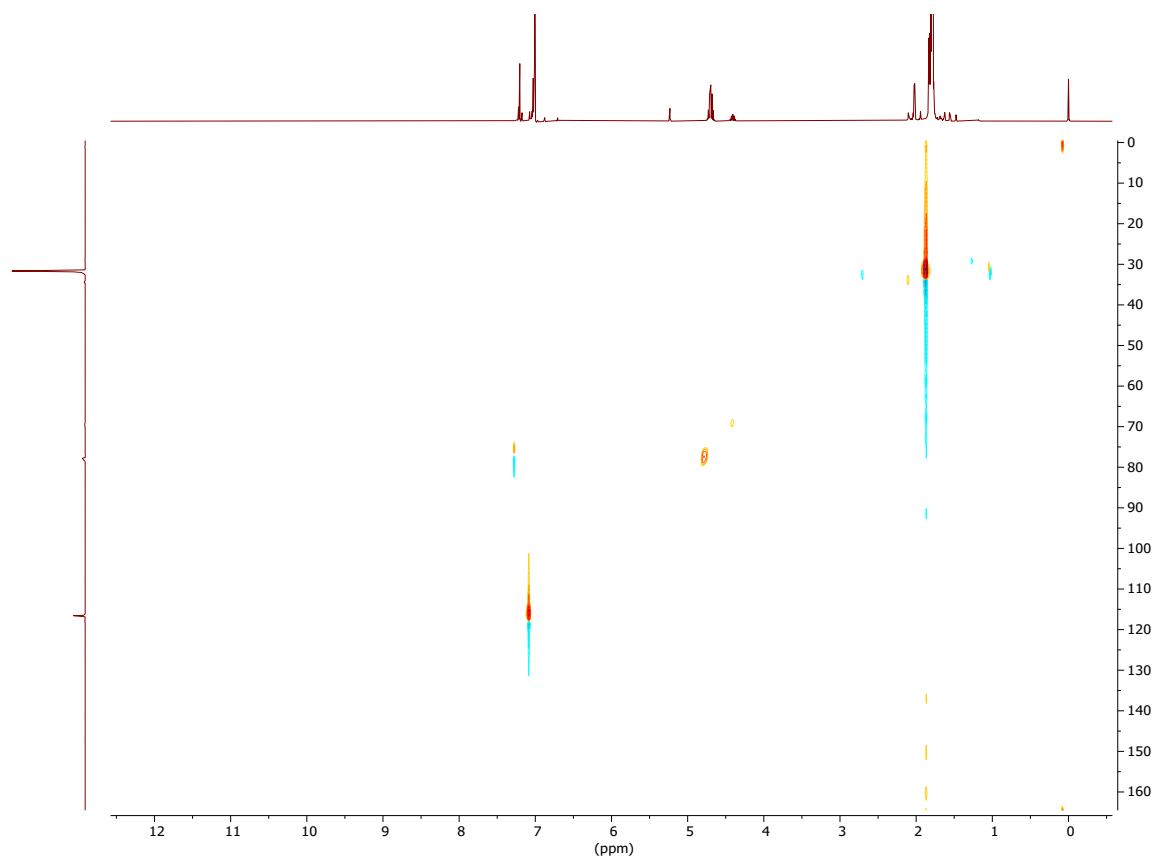

# HMBC NMR of 1h

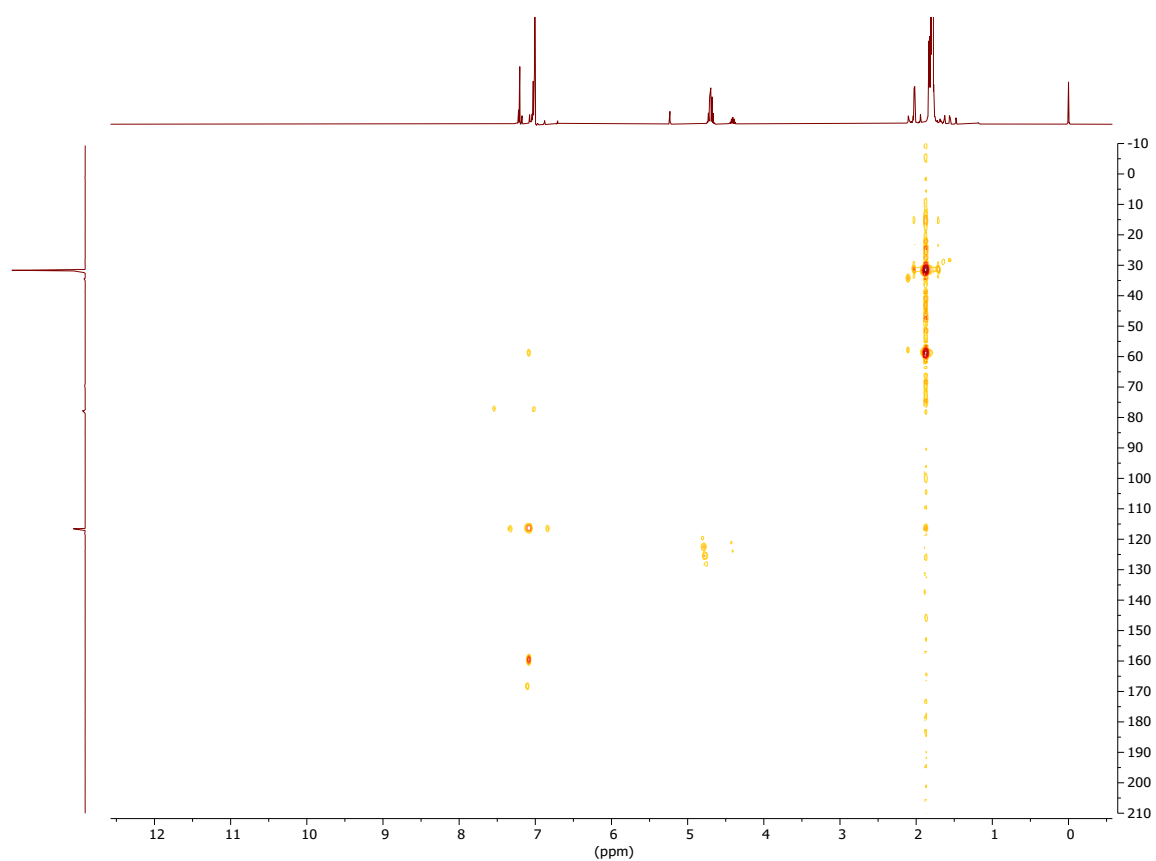

$^1\text{H}$  NMR of  $[\text{Au}(\text{IMes})(\text{OCH}(\text{CF}_3)_2)]$  (1i)

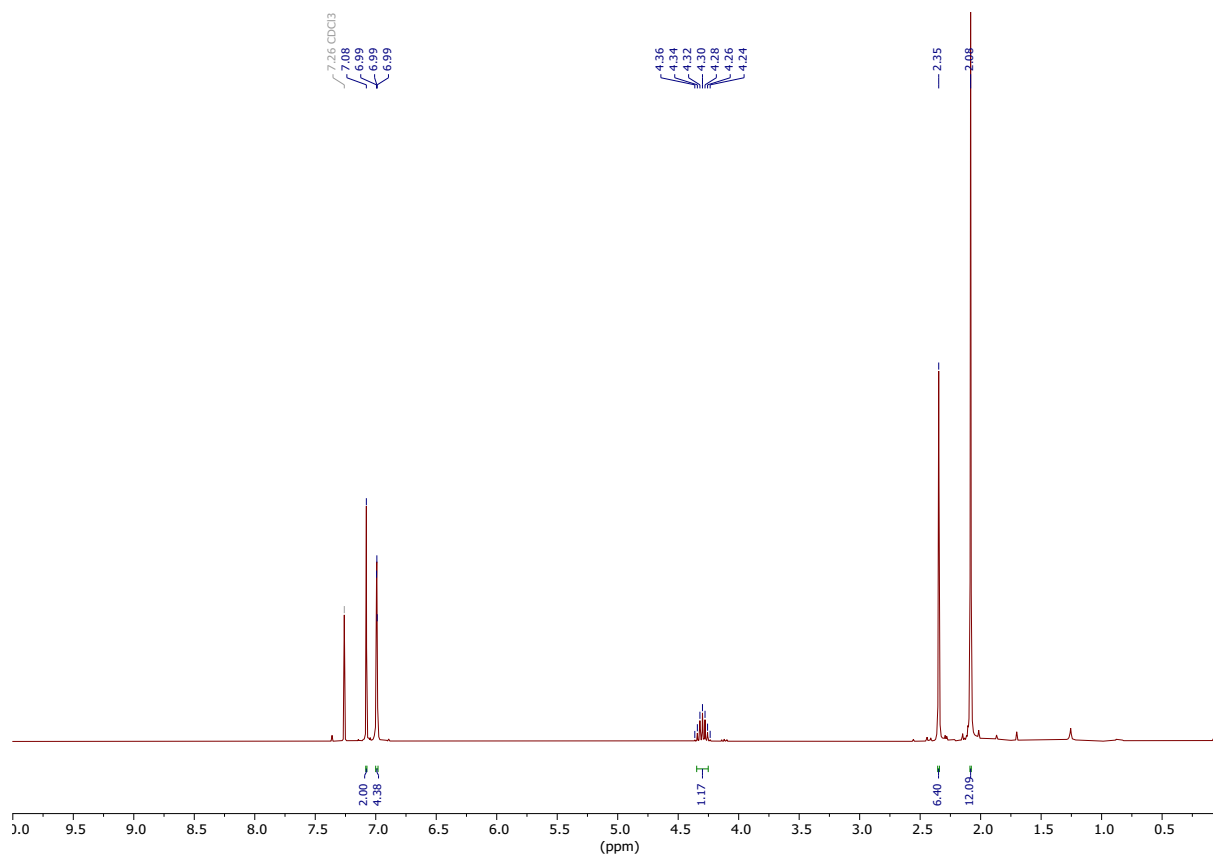

**<sup>13</sup>C NMR of 1i**

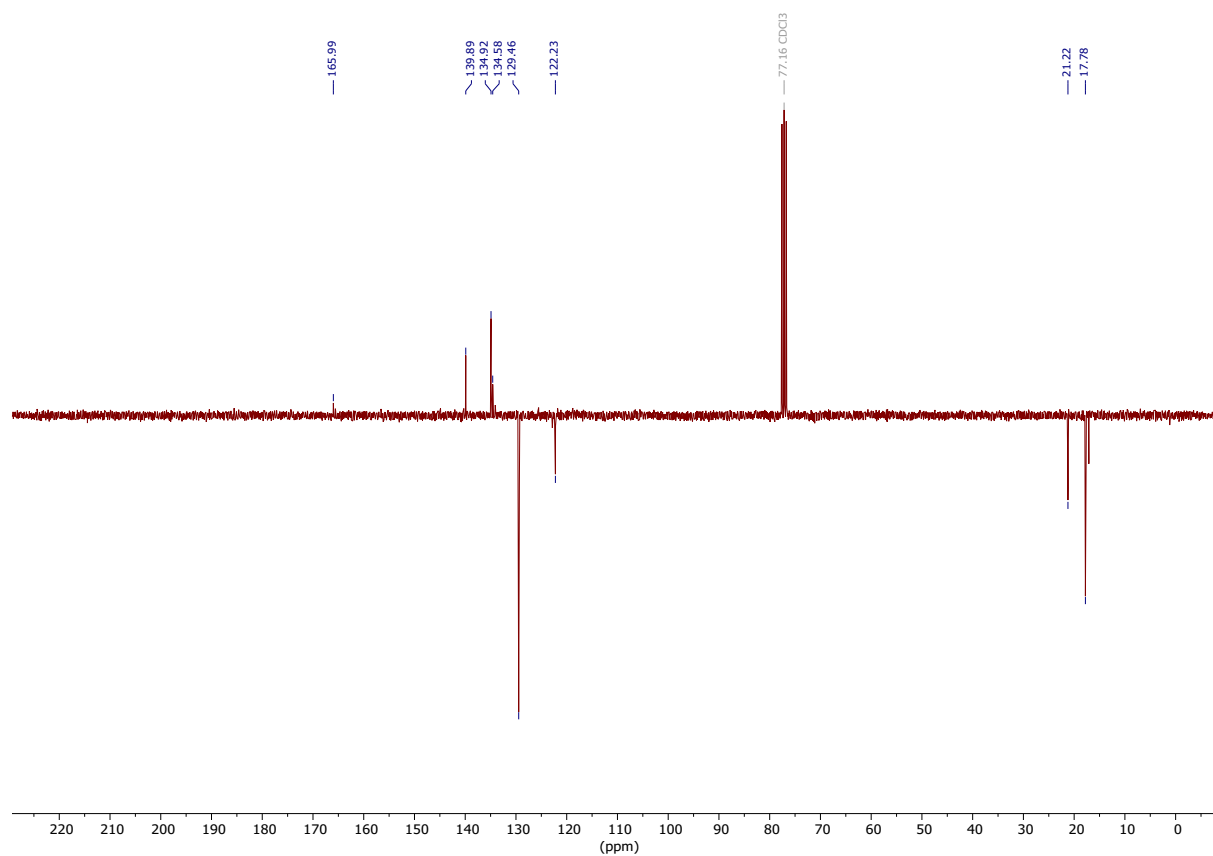

**$^{19}\text{F}$  NMR of **1i****

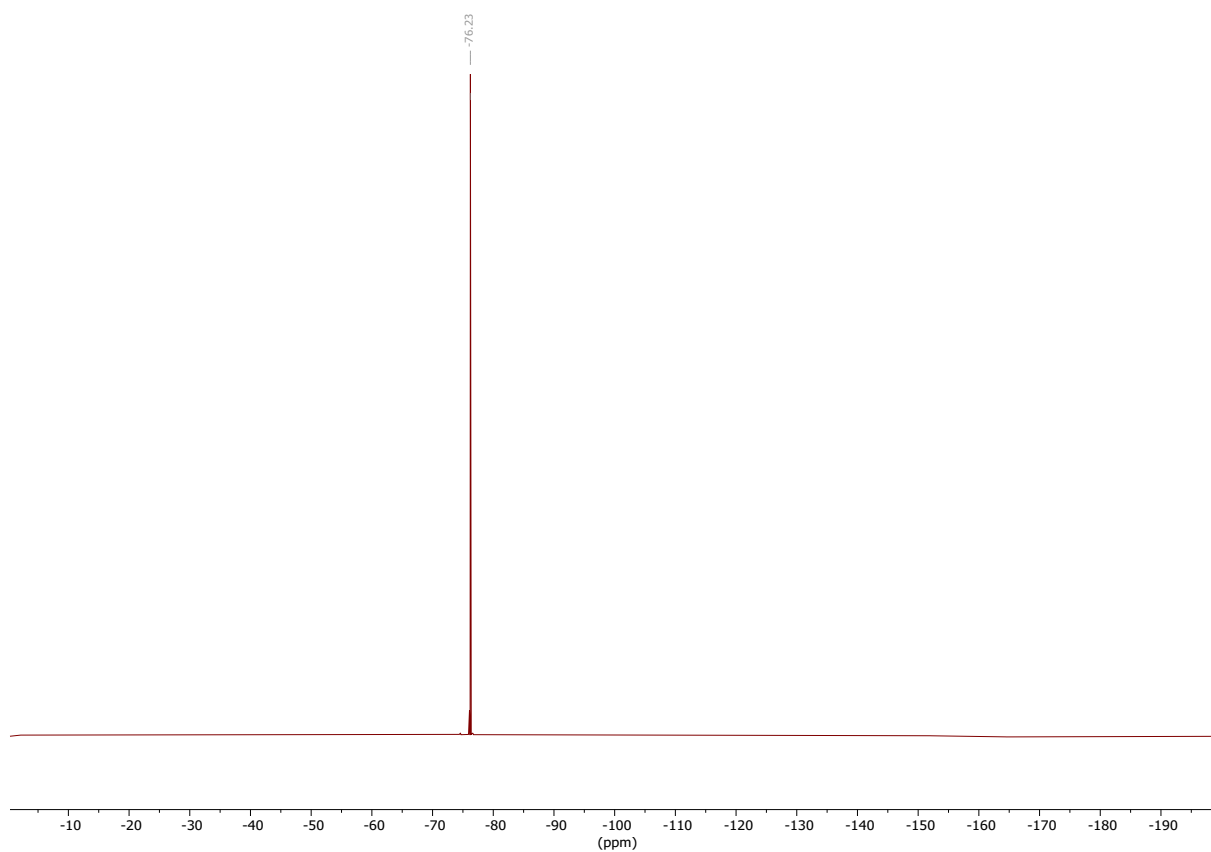

COSY NMR of 1i

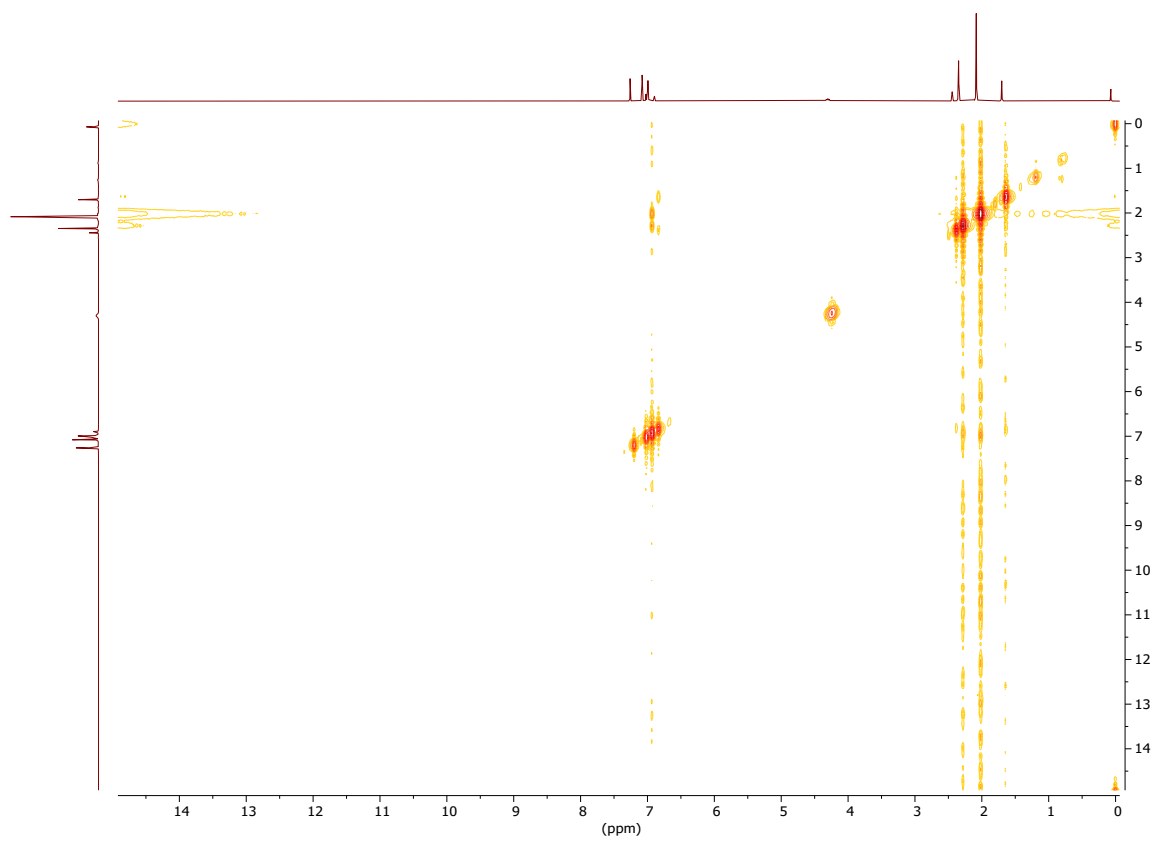



# HSQC NMR of 1i

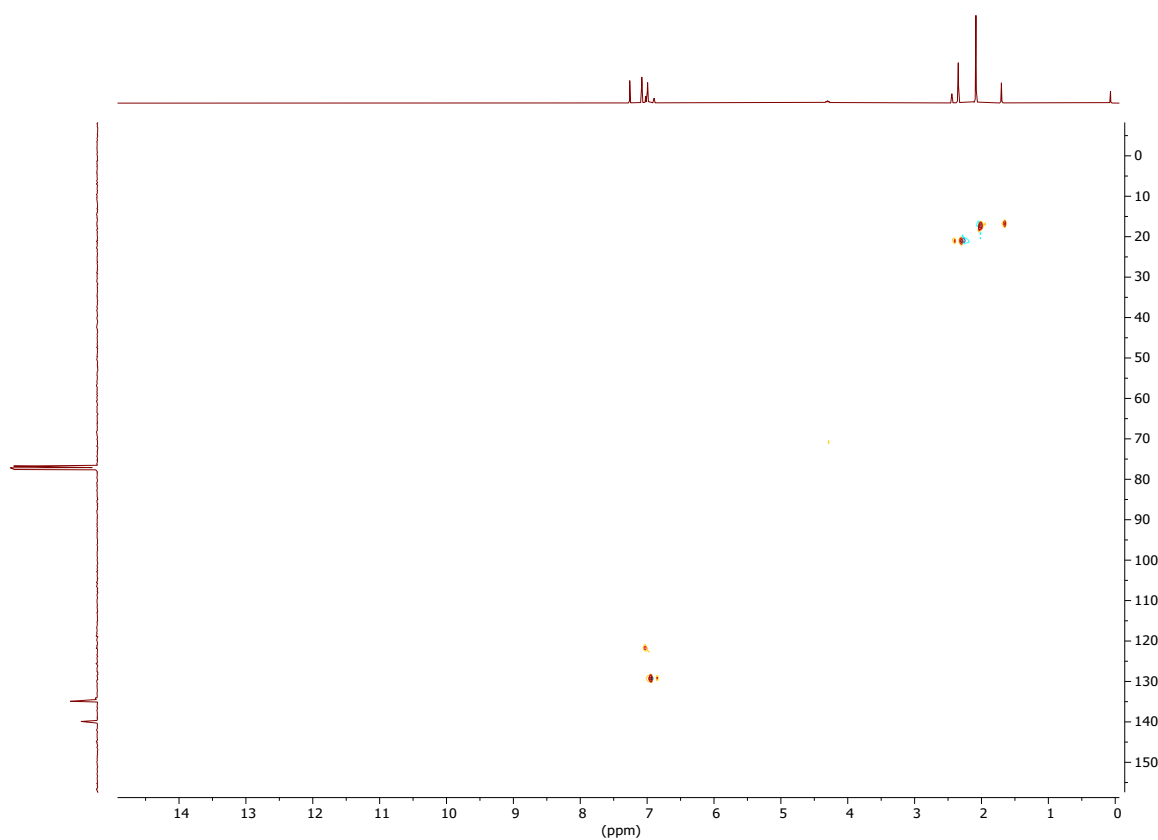

# HMBC NMR of 1i

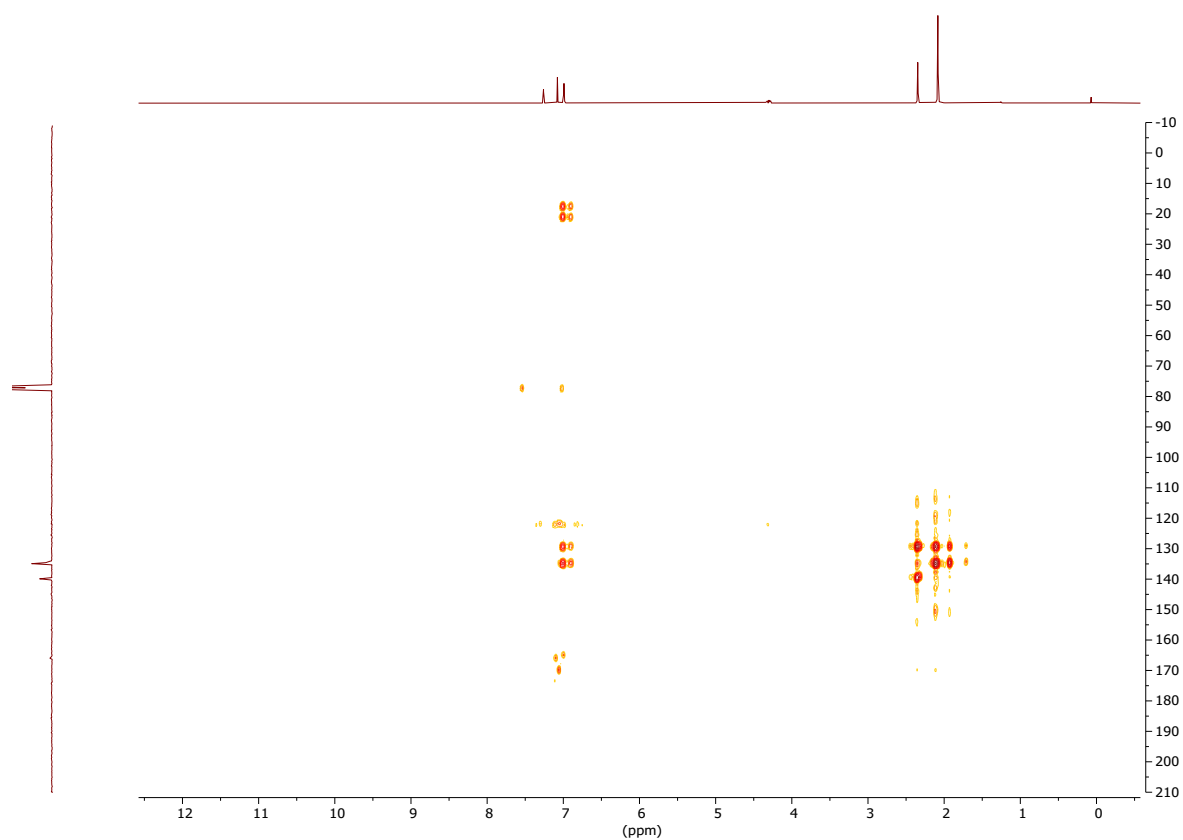

<sup>1</sup>H NMR of [Au(JohnPhos)(OCH(CF<sub>3</sub>)<sub>2</sub>)] (1j)

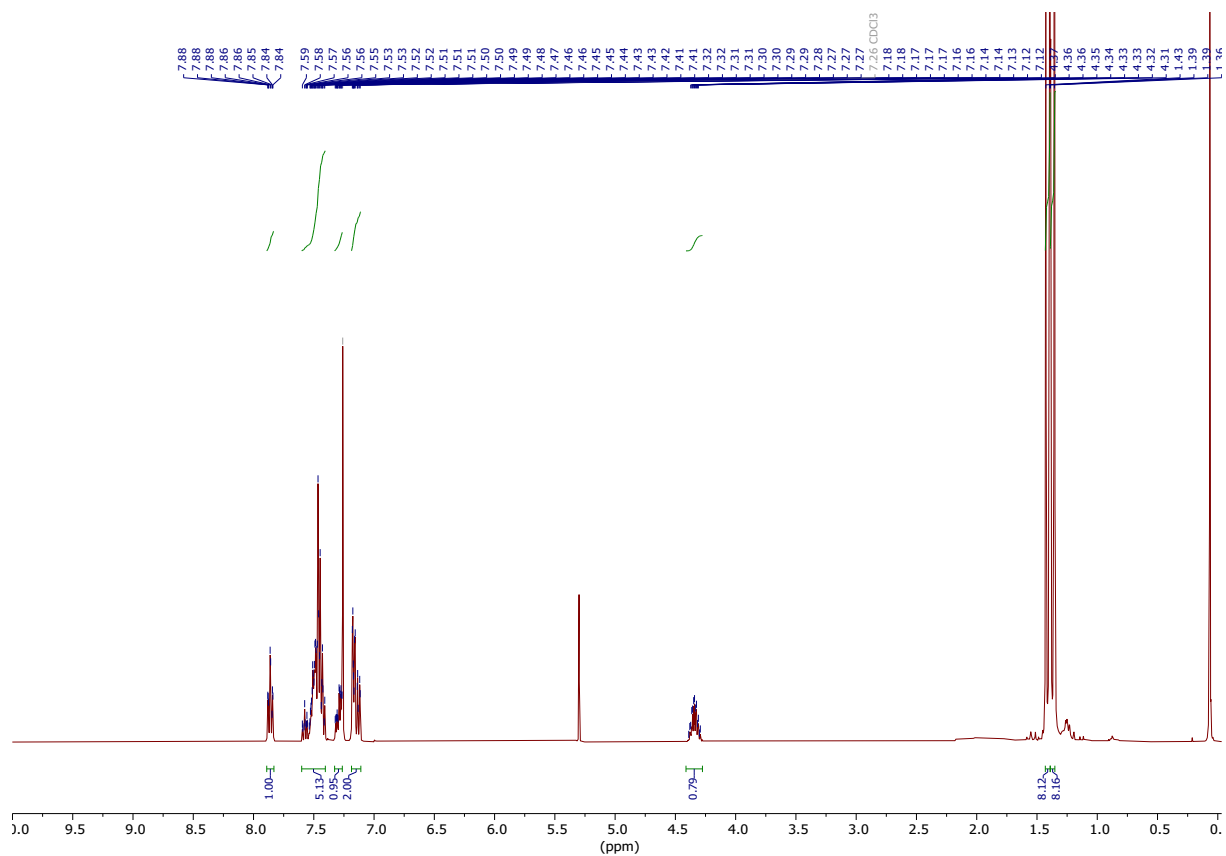

**<sup>13</sup>C NMR of 1j**

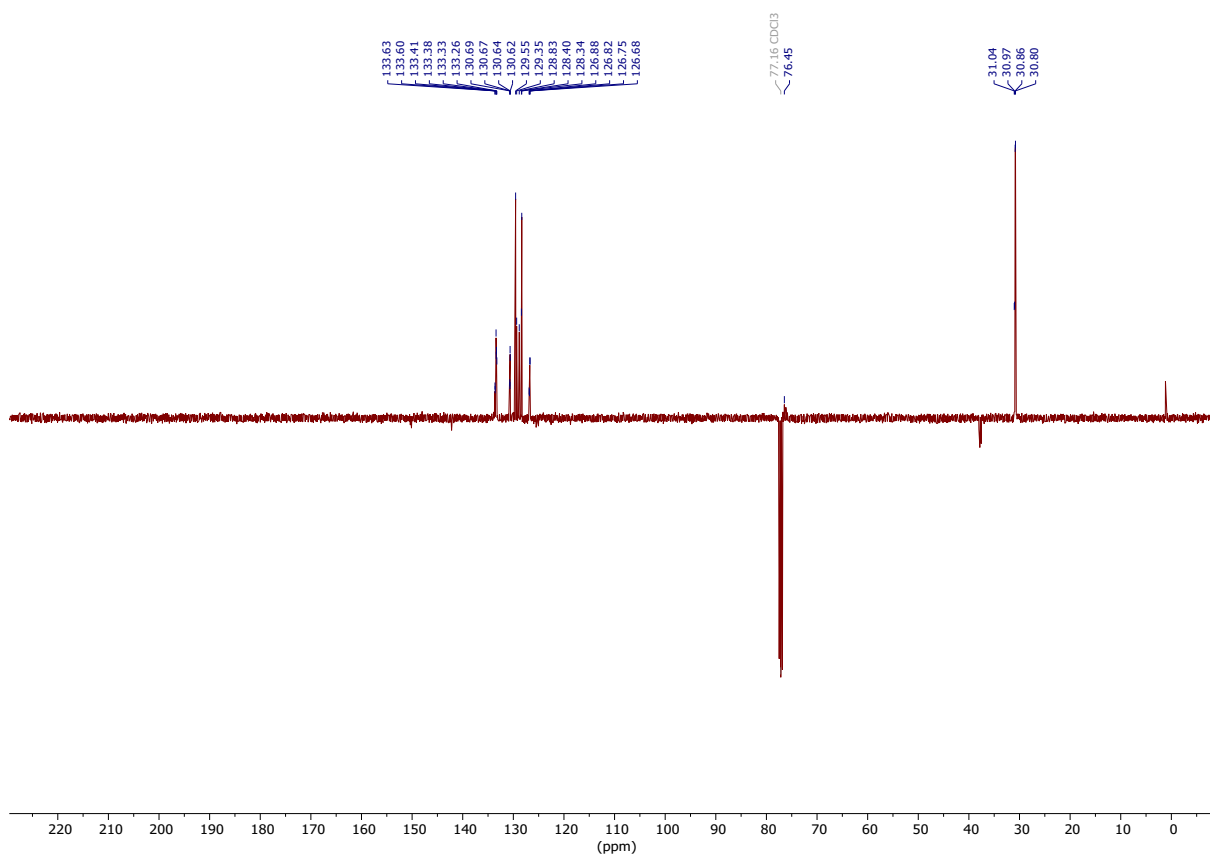

**$^{31}\text{P}$  NMR of 1j**

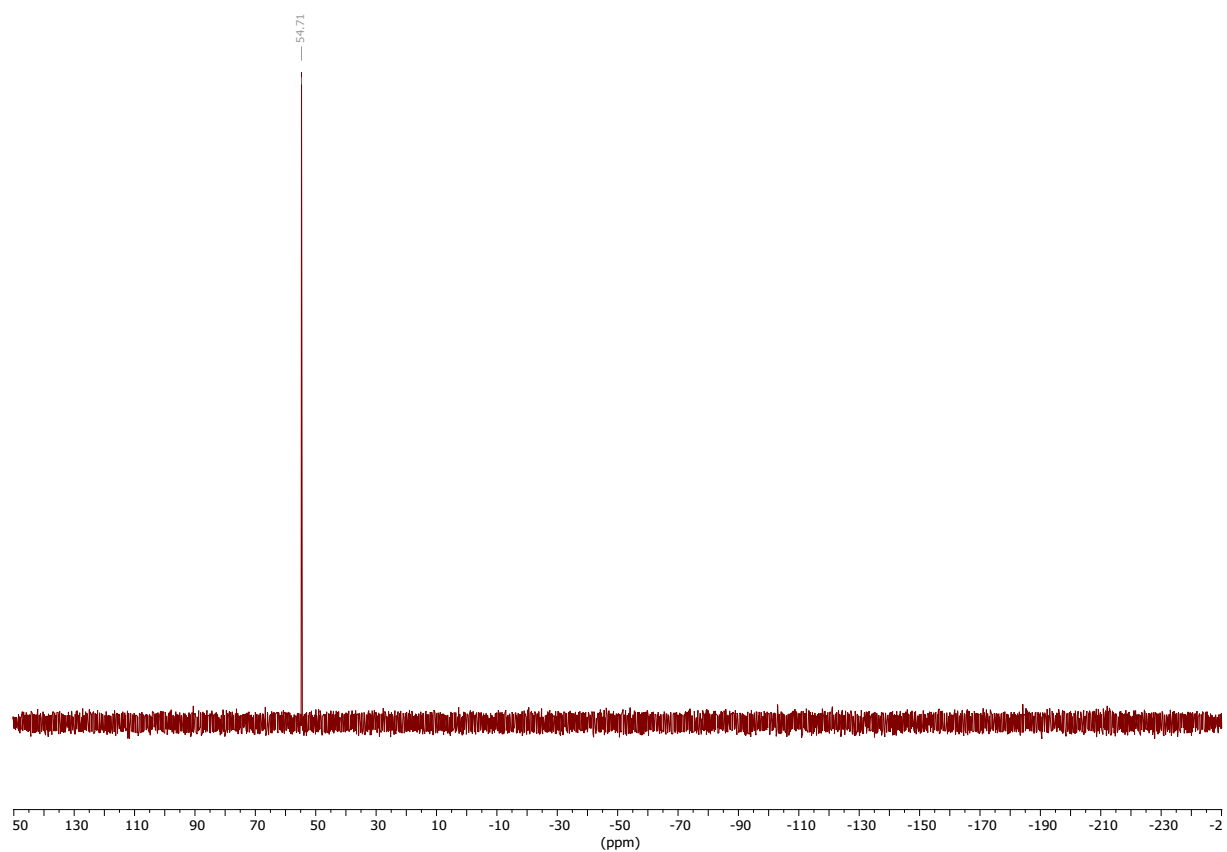

**$^{19}\text{F}$  NMR of 1j**

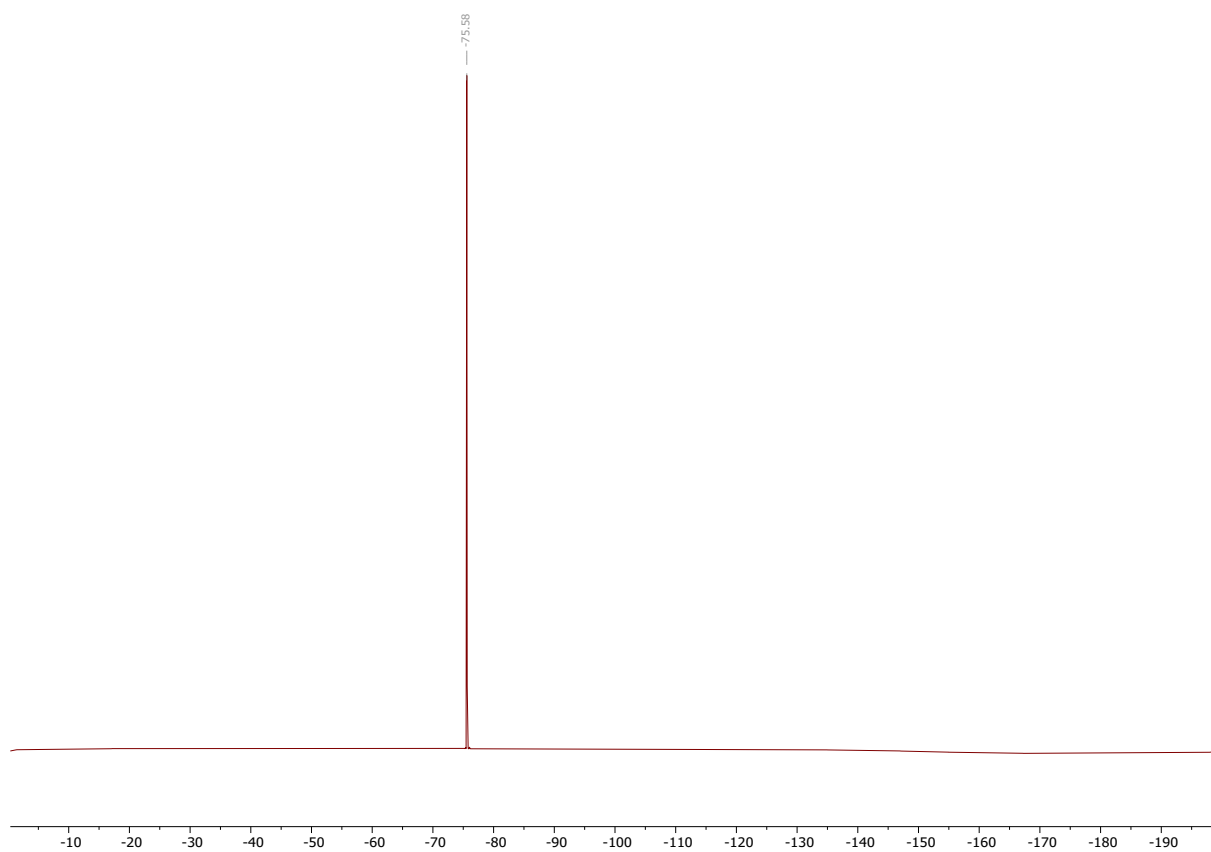

COSY NMR of 1j

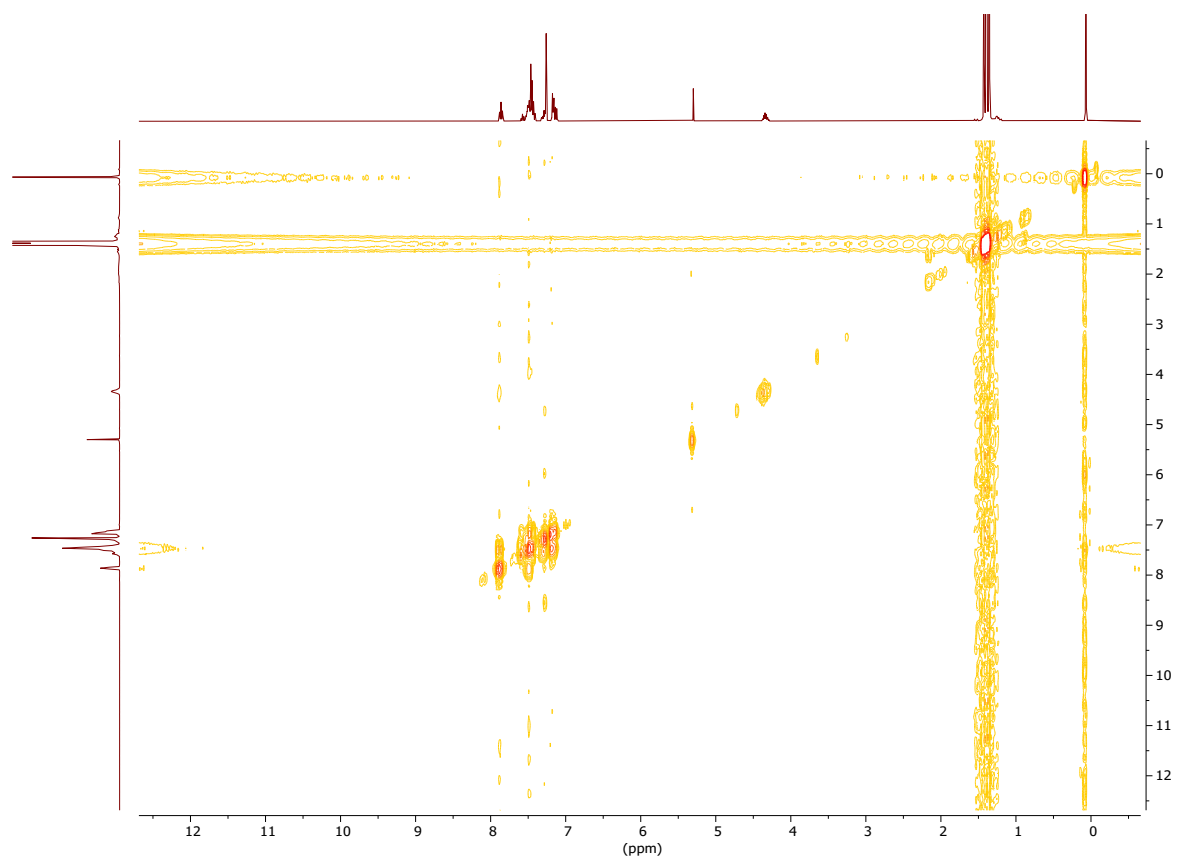

# HSQC NMR of 1j

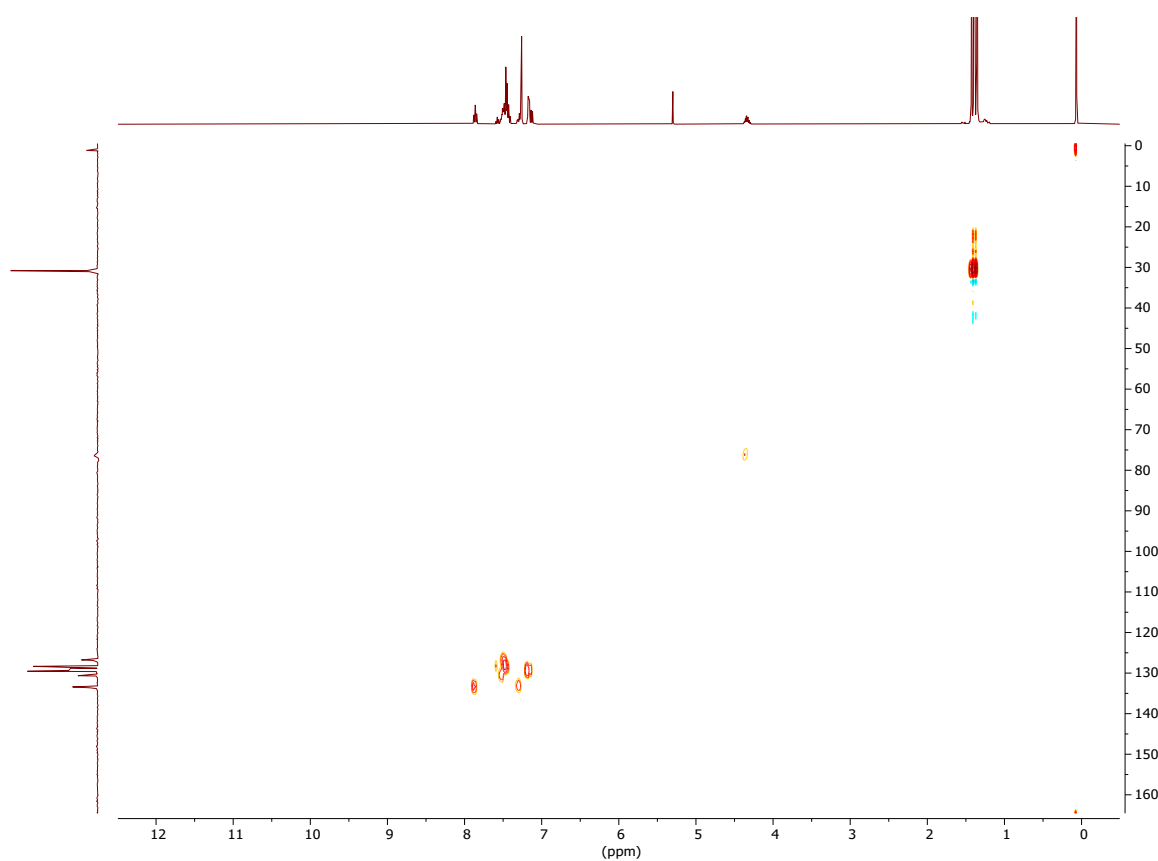



# HMBC NMR of 1j

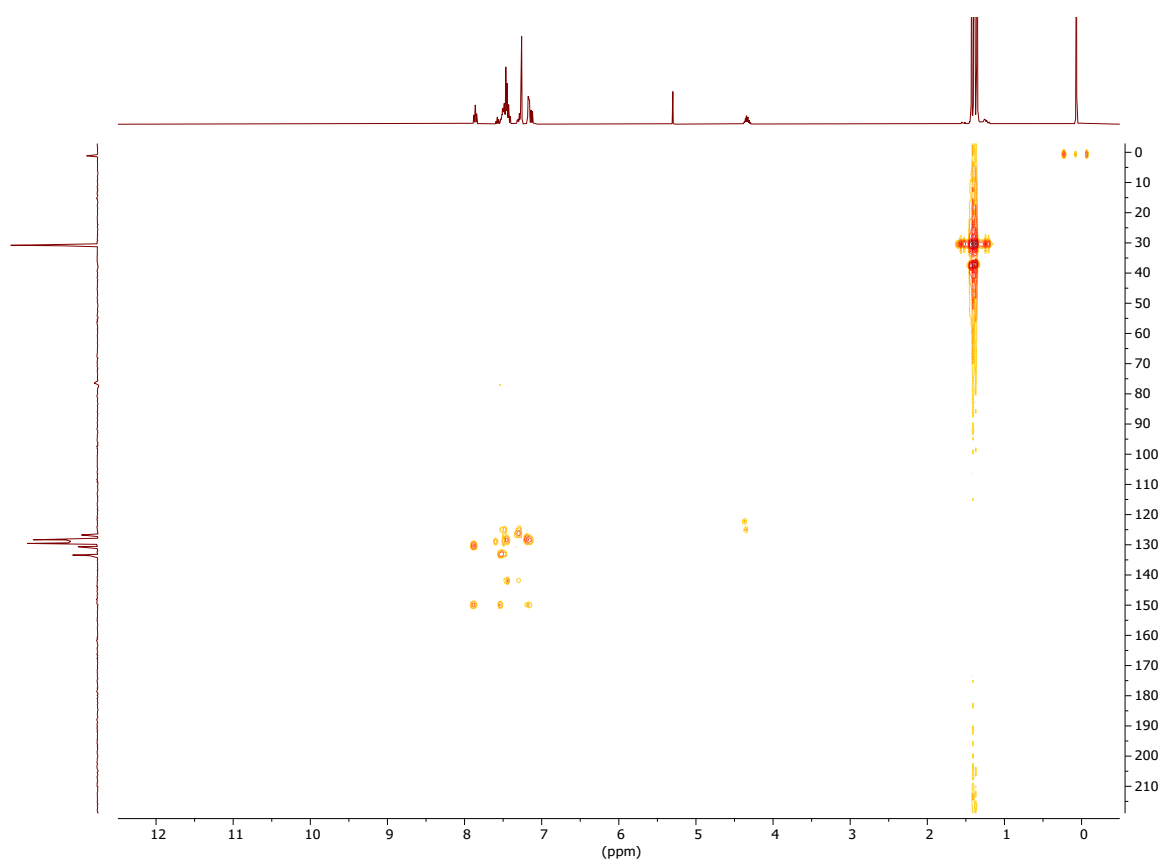

$^1\text{H}$  NMR of  $[\text{Au}(\text{IPr})(\text{OCH}_2\text{CF}_3)]$  (**2a**)

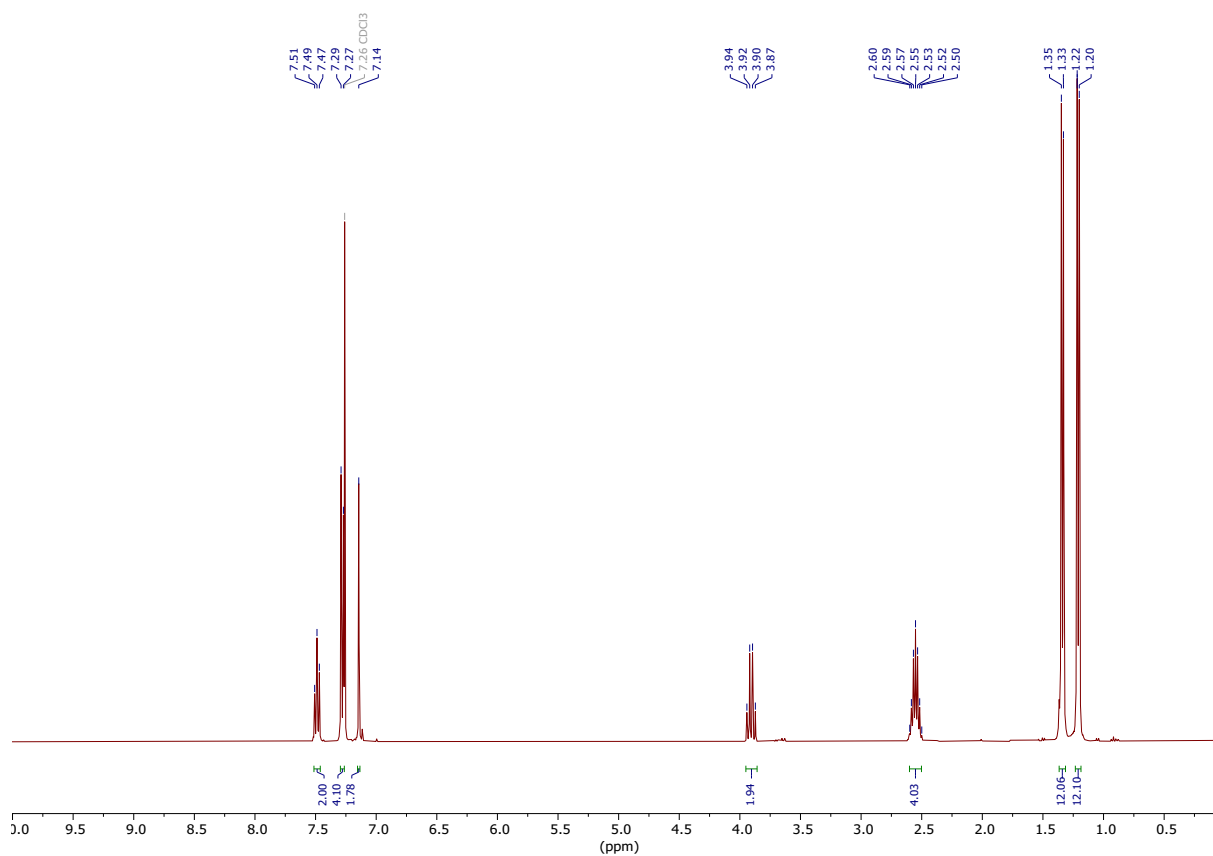

# <sup>13</sup>C NMR of 2a

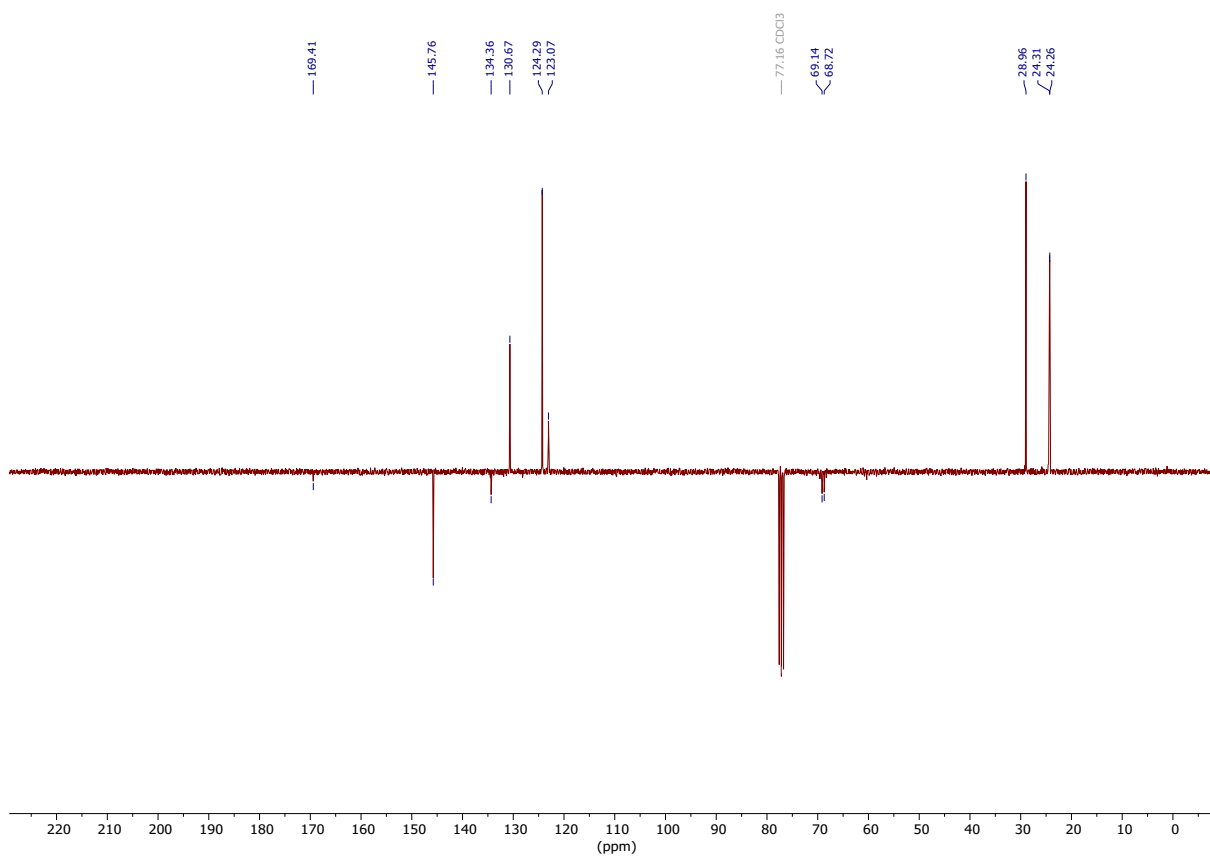

**$^{19}\text{F}$  NMR of 2a**

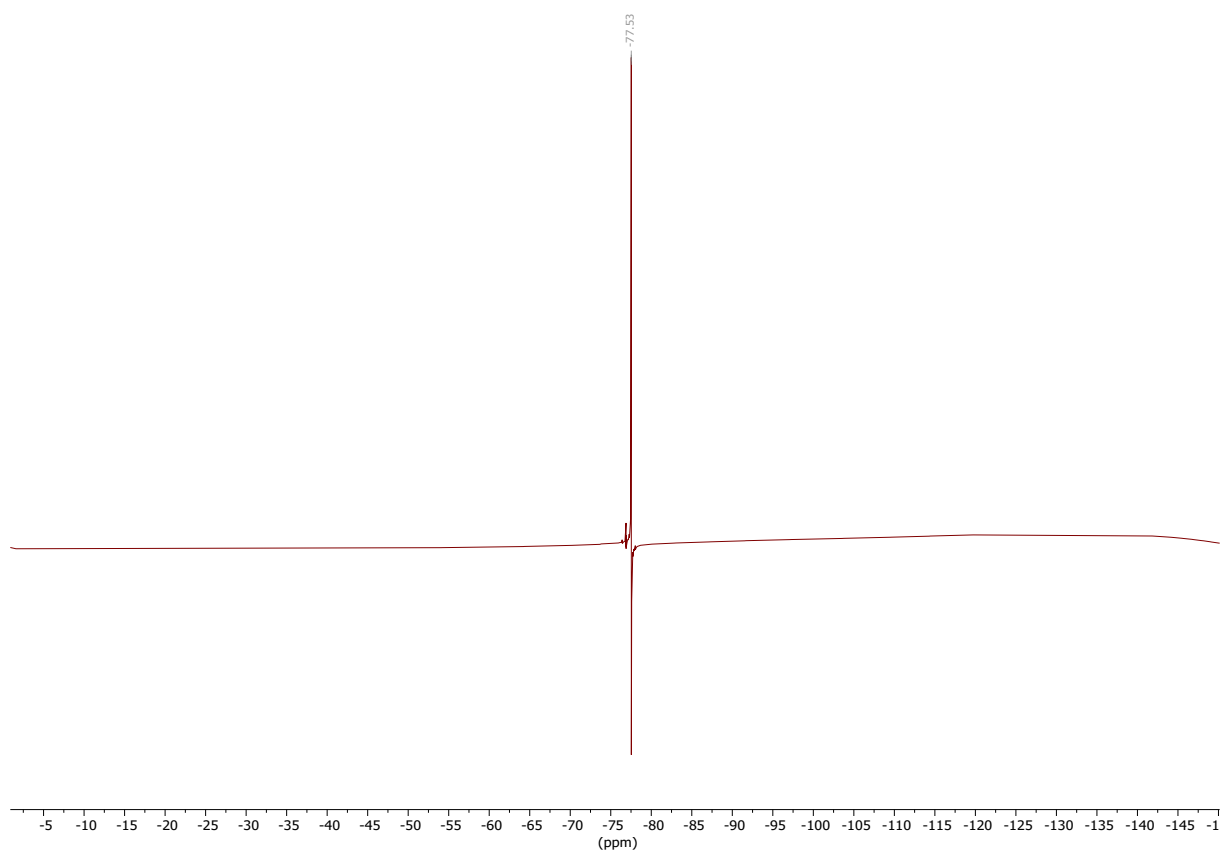

COSY NMR of 2a

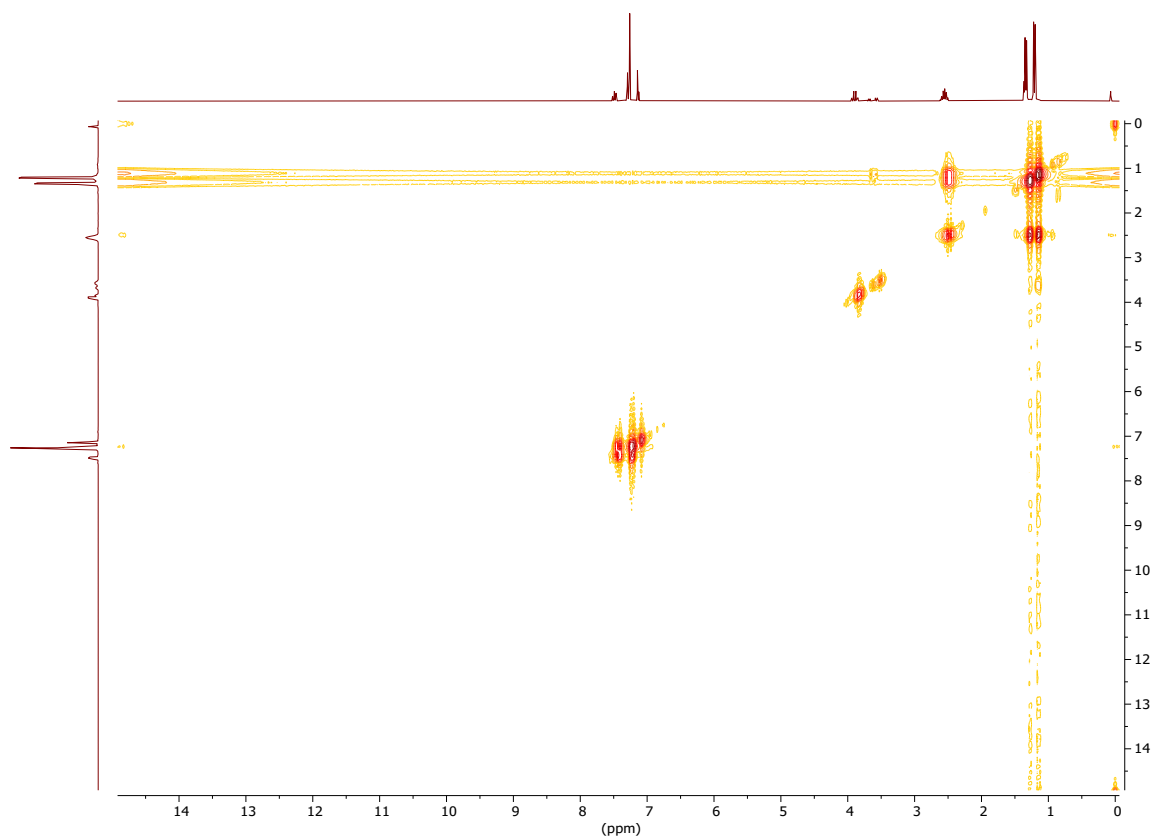

# HSQC NMR of 2a

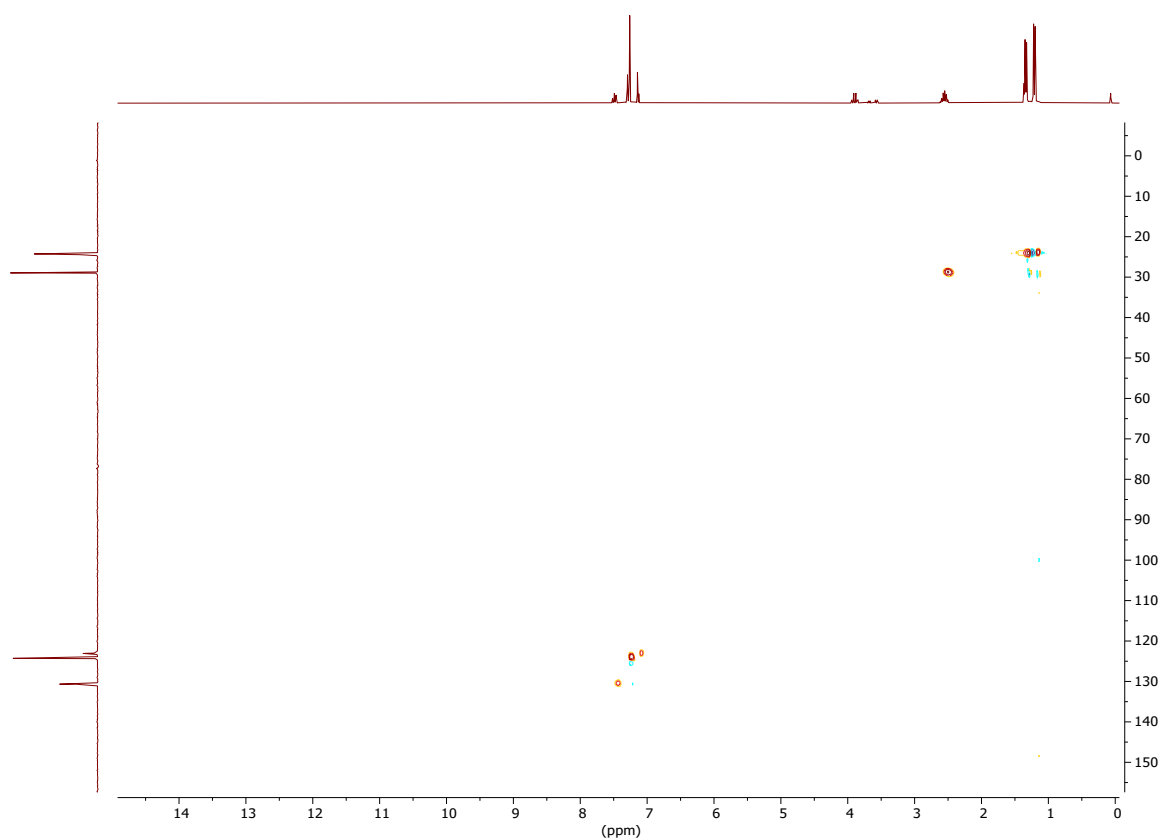

# $^1\text{H}$ NMR of $[\text{Au}(\text{IPr})\text{Ph}]$ (3a)

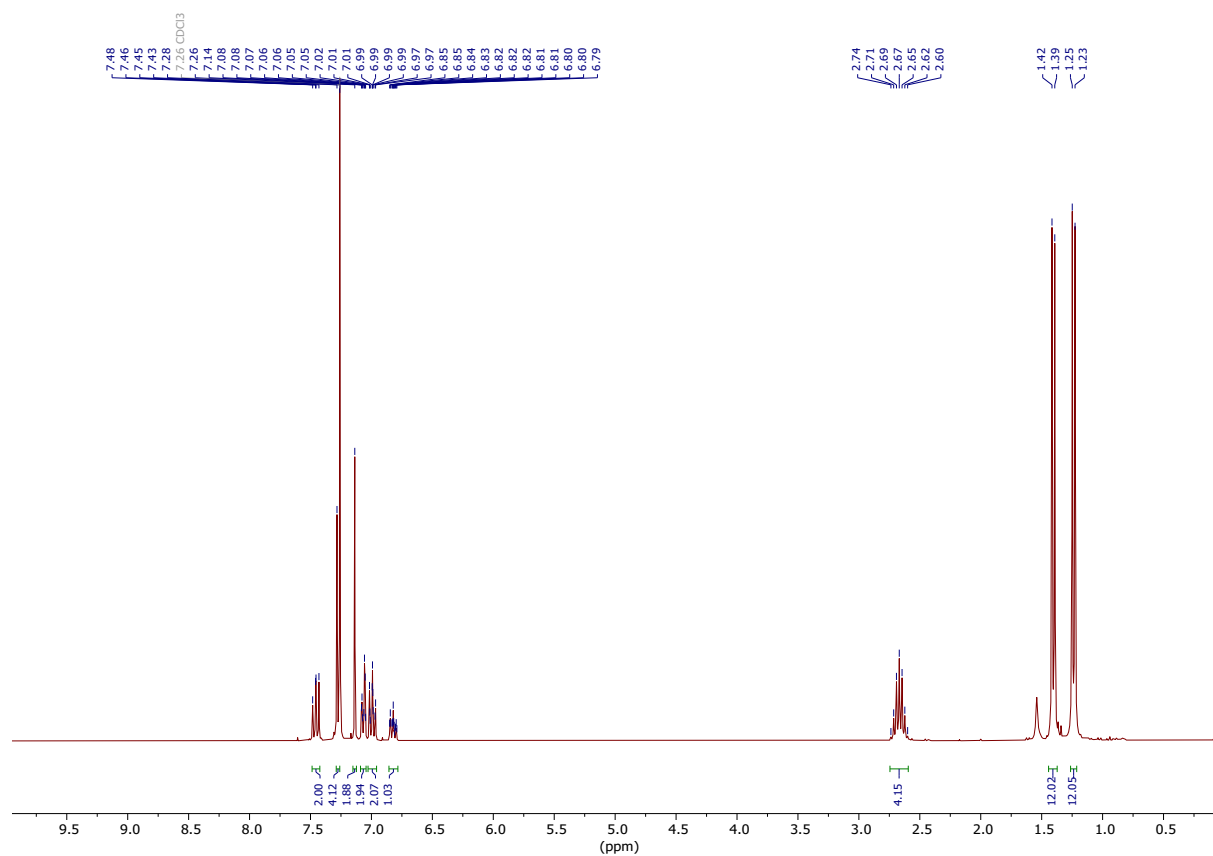

# $^1\text{H}$ NMR of $[\text{Au}(\text{IPr})_2\text{-Naphthyl}]$ (3b)

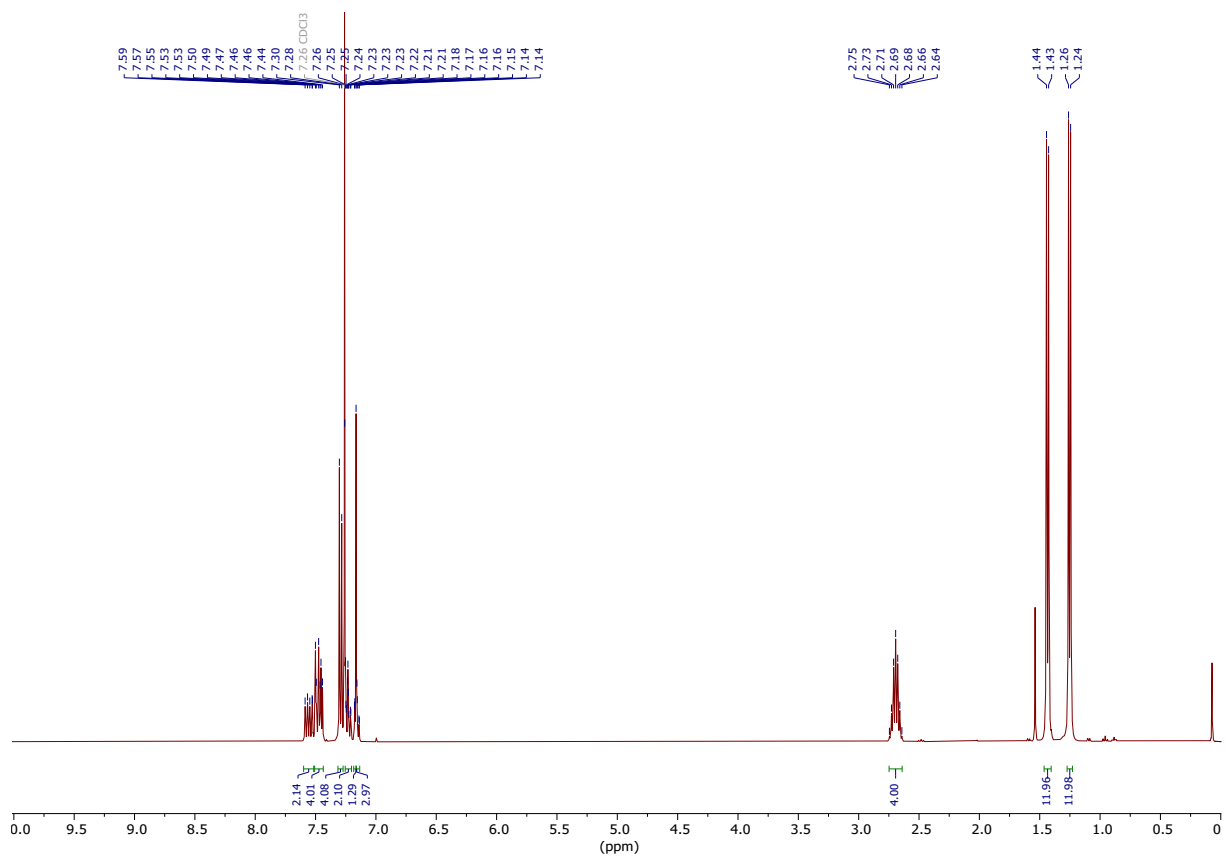



# $^1\text{H}$ NMR of $[\text{Au}(\text{IPr})\text{PhF}]$ (3c)

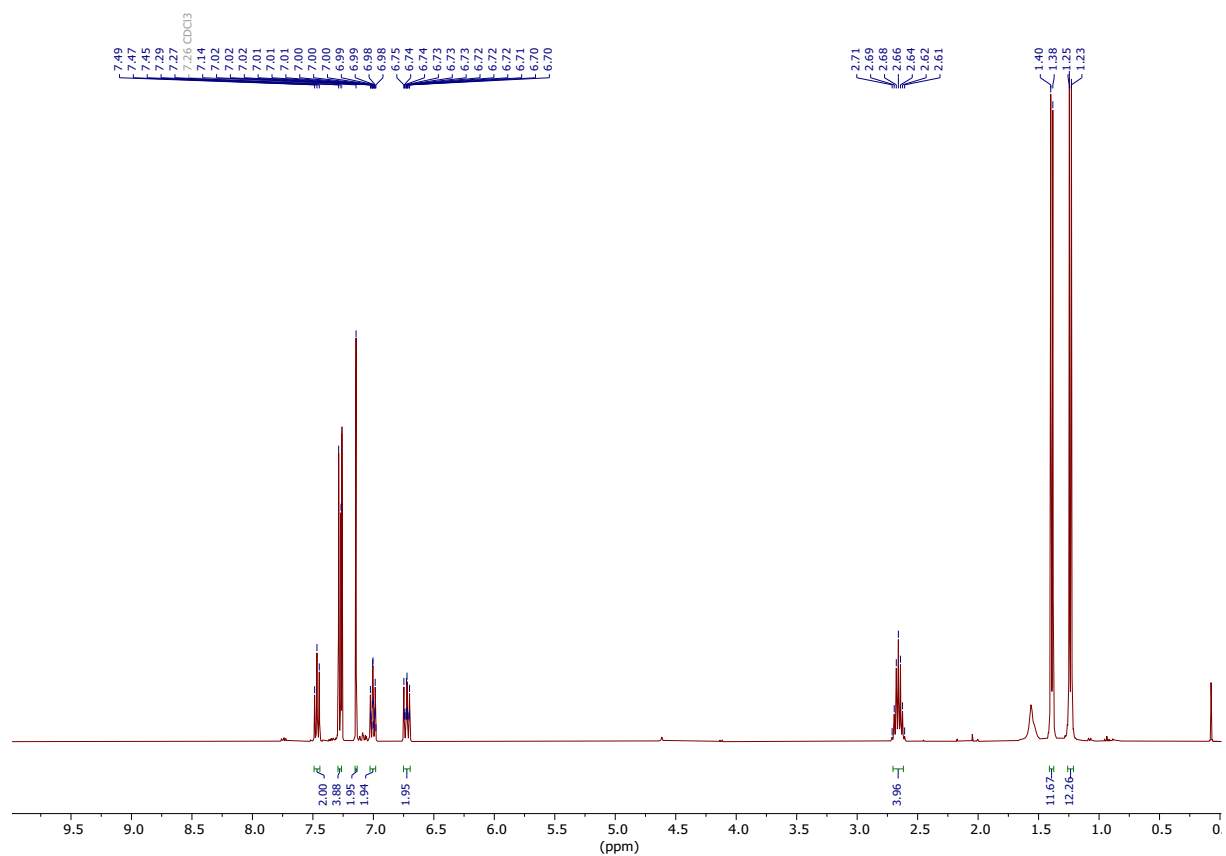

$^1\text{H}$  NMR of  $[\text{Au}(\text{IPr})\text{PhCF}_3]$  (3d)

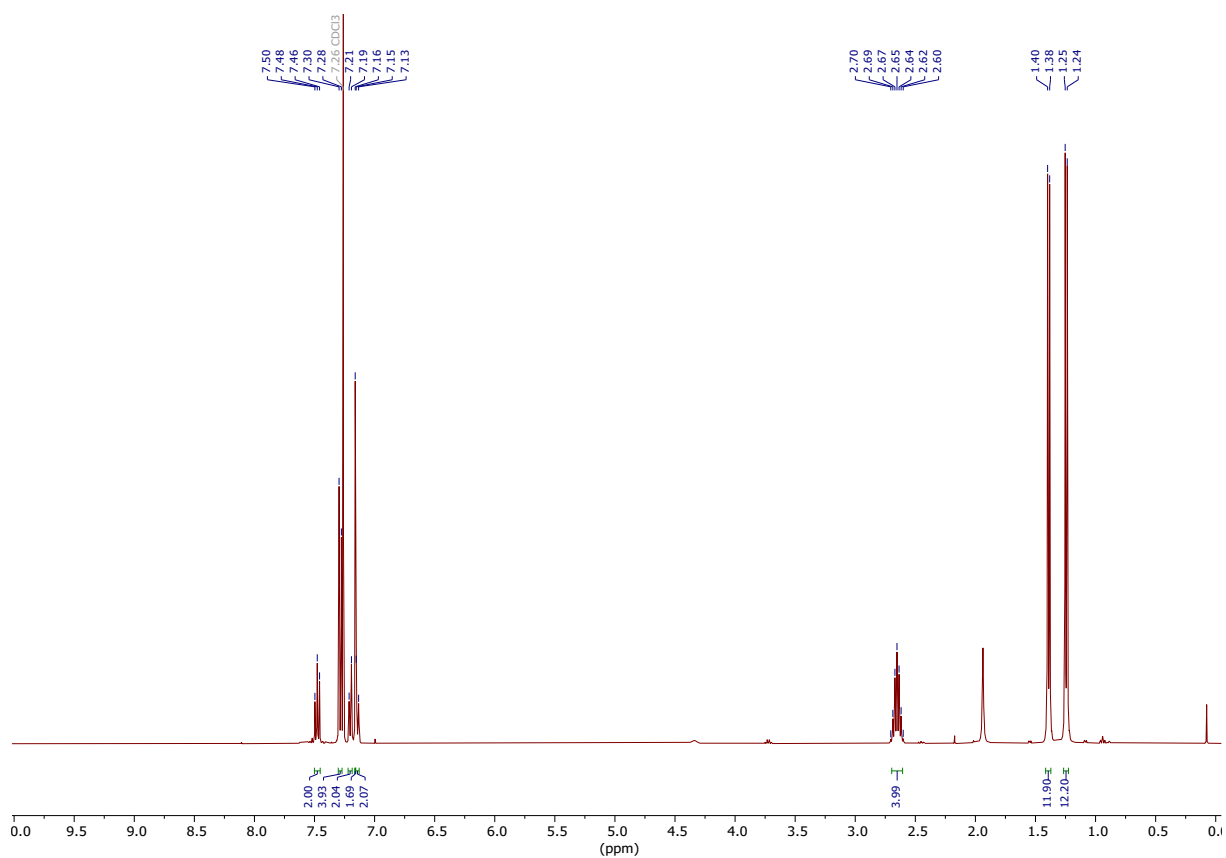

<sup>1</sup>H NMR of [Au(IPr)Phenylacetylene] (4a)

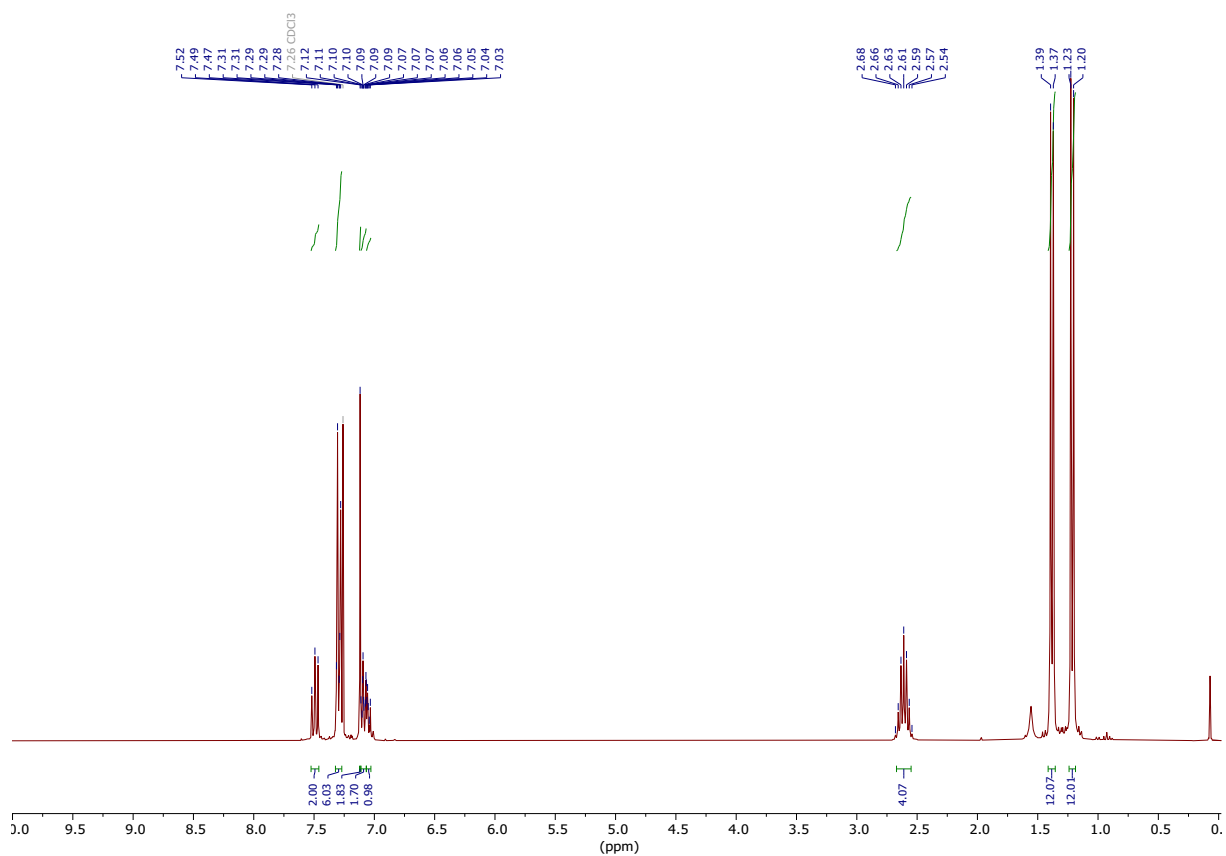

# $^1\text{H}$ NMR of $[\text{Au}(\text{IMes})\text{Phenylacetylene}]$ (**4b**)

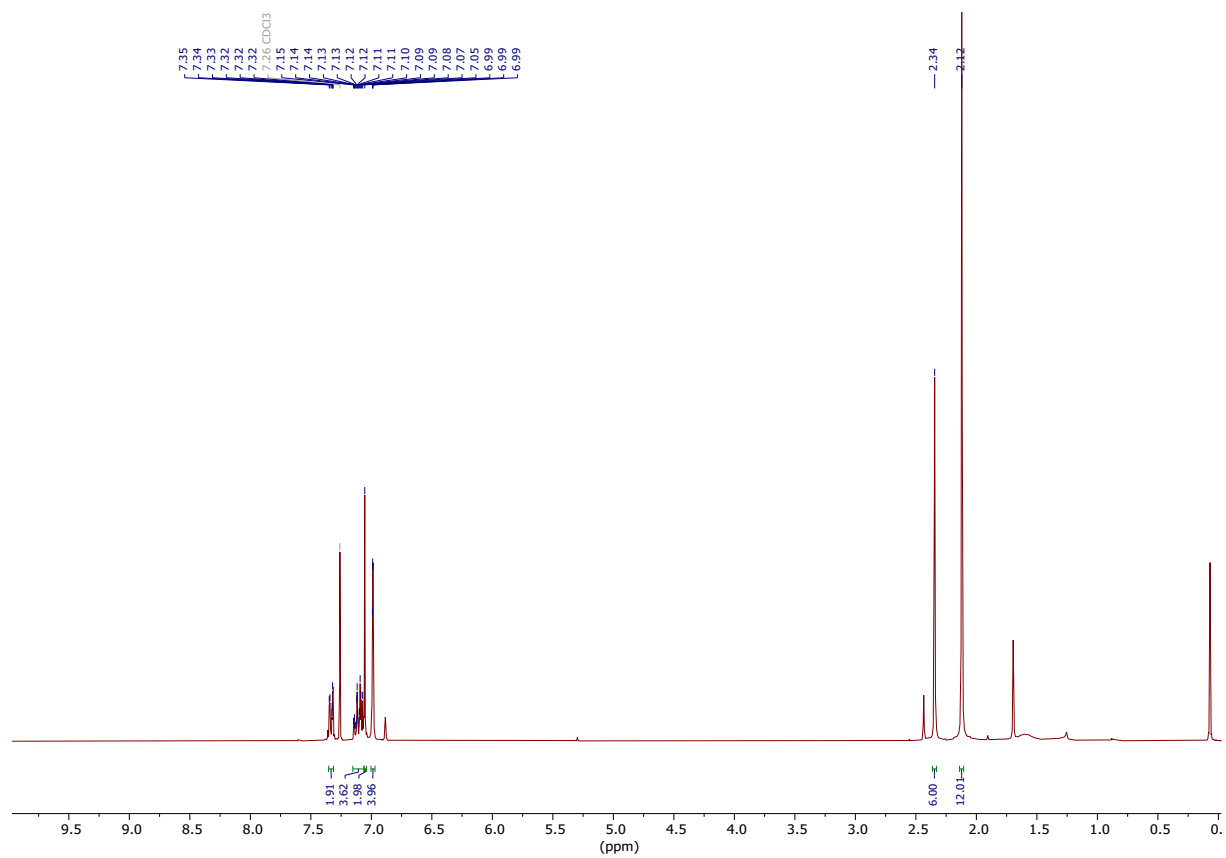

# $^1\text{H}$ NMR of $[\text{Au}(\text{IPr}^*)\text{Phenylacetylene}]$ (4c)

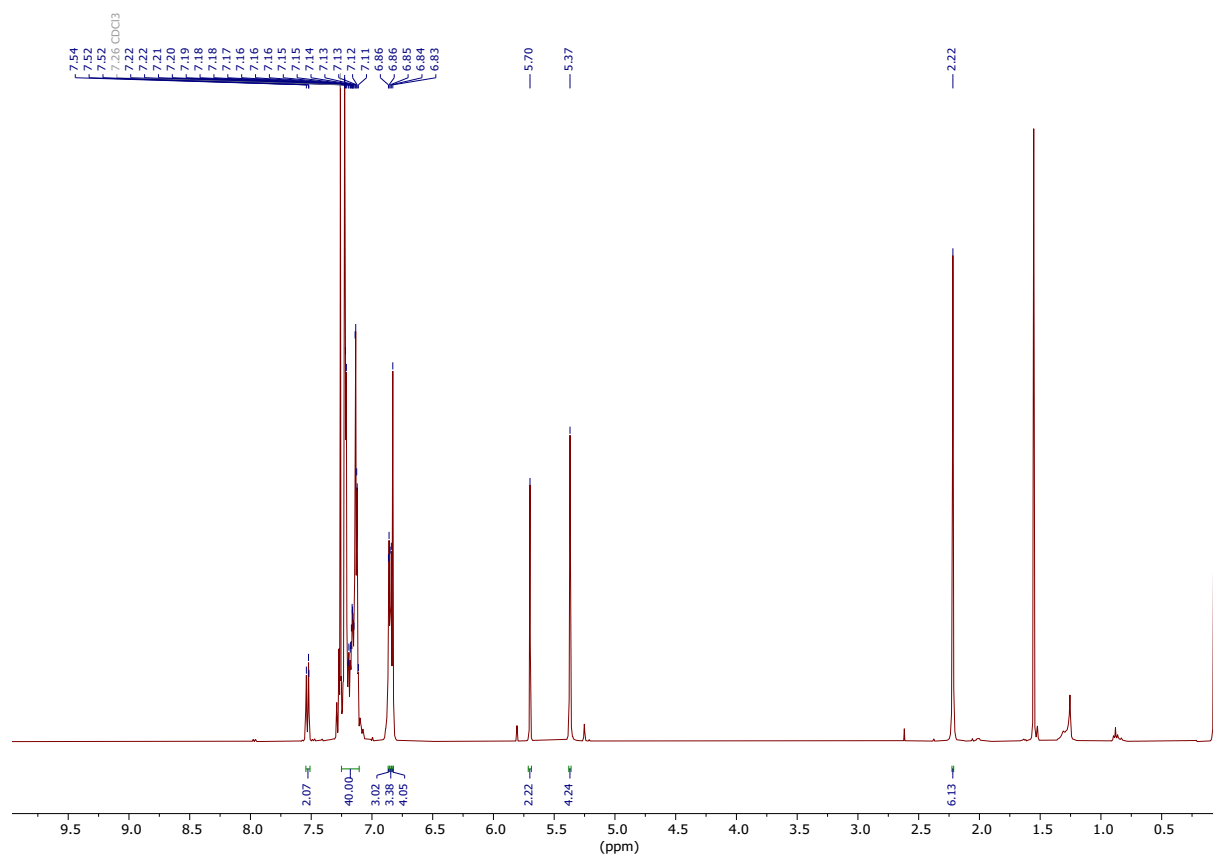

# $^1\text{H}$ NMR of $[\text{Au}(\text{IPr})\text{Cbz}]$ (5)

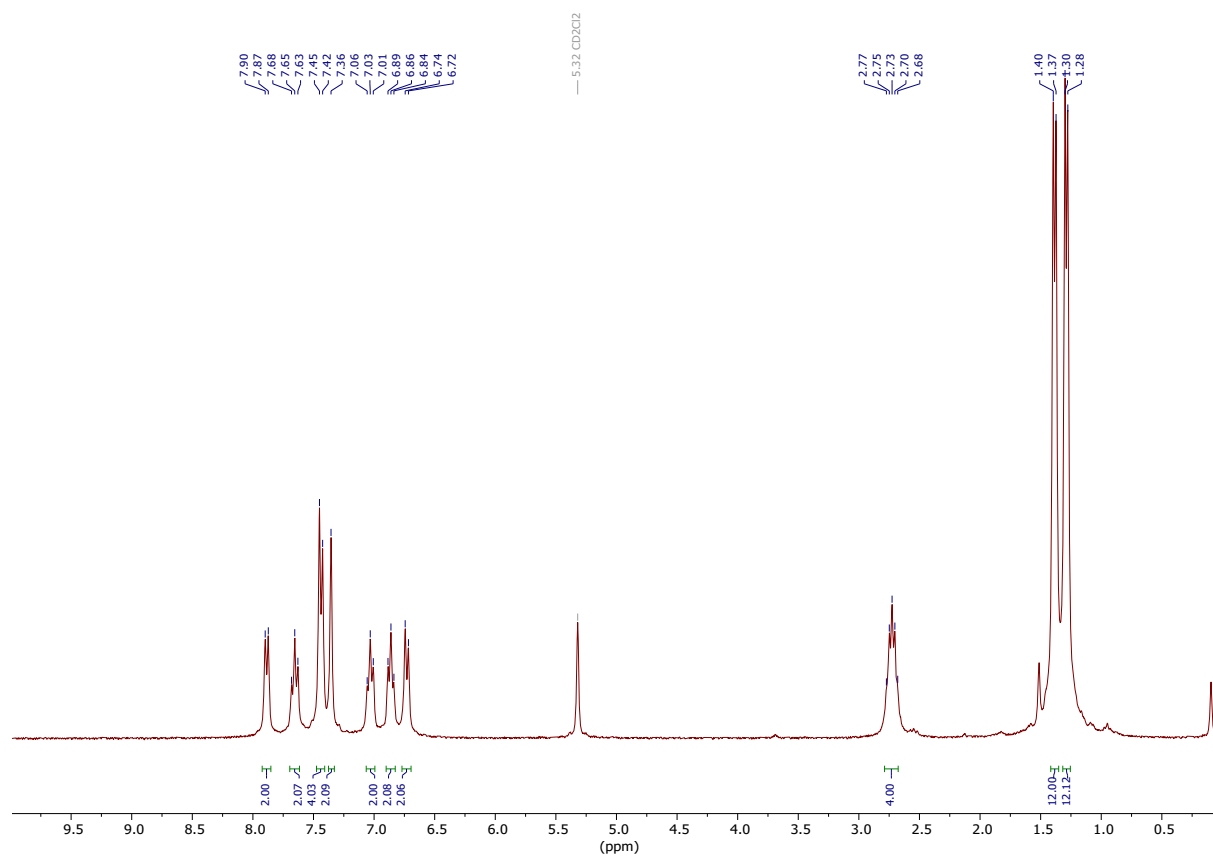

## HRMS Data

### HRMS of $[\text{Au}(\text{SIPr})(\text{OCH}(\text{CF}_3)_2)]$ (1b)

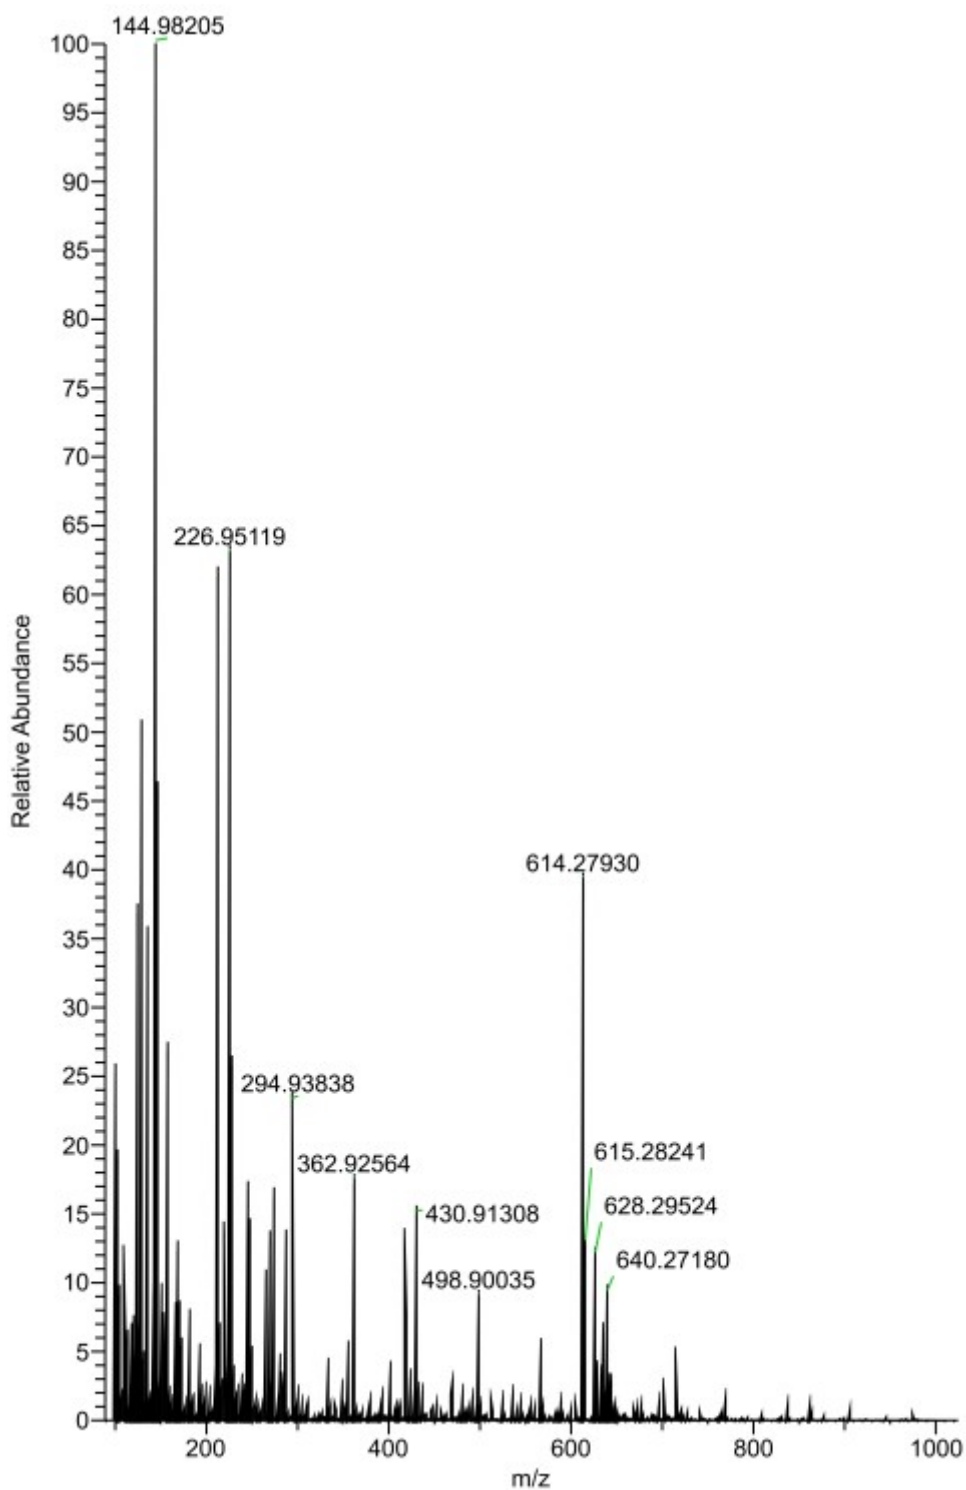

HRMS of  $[\text{Au}(\text{IPr}^{\text{Cl}})(\text{OCH}(\text{CF}_3)_2)]$  (1c)

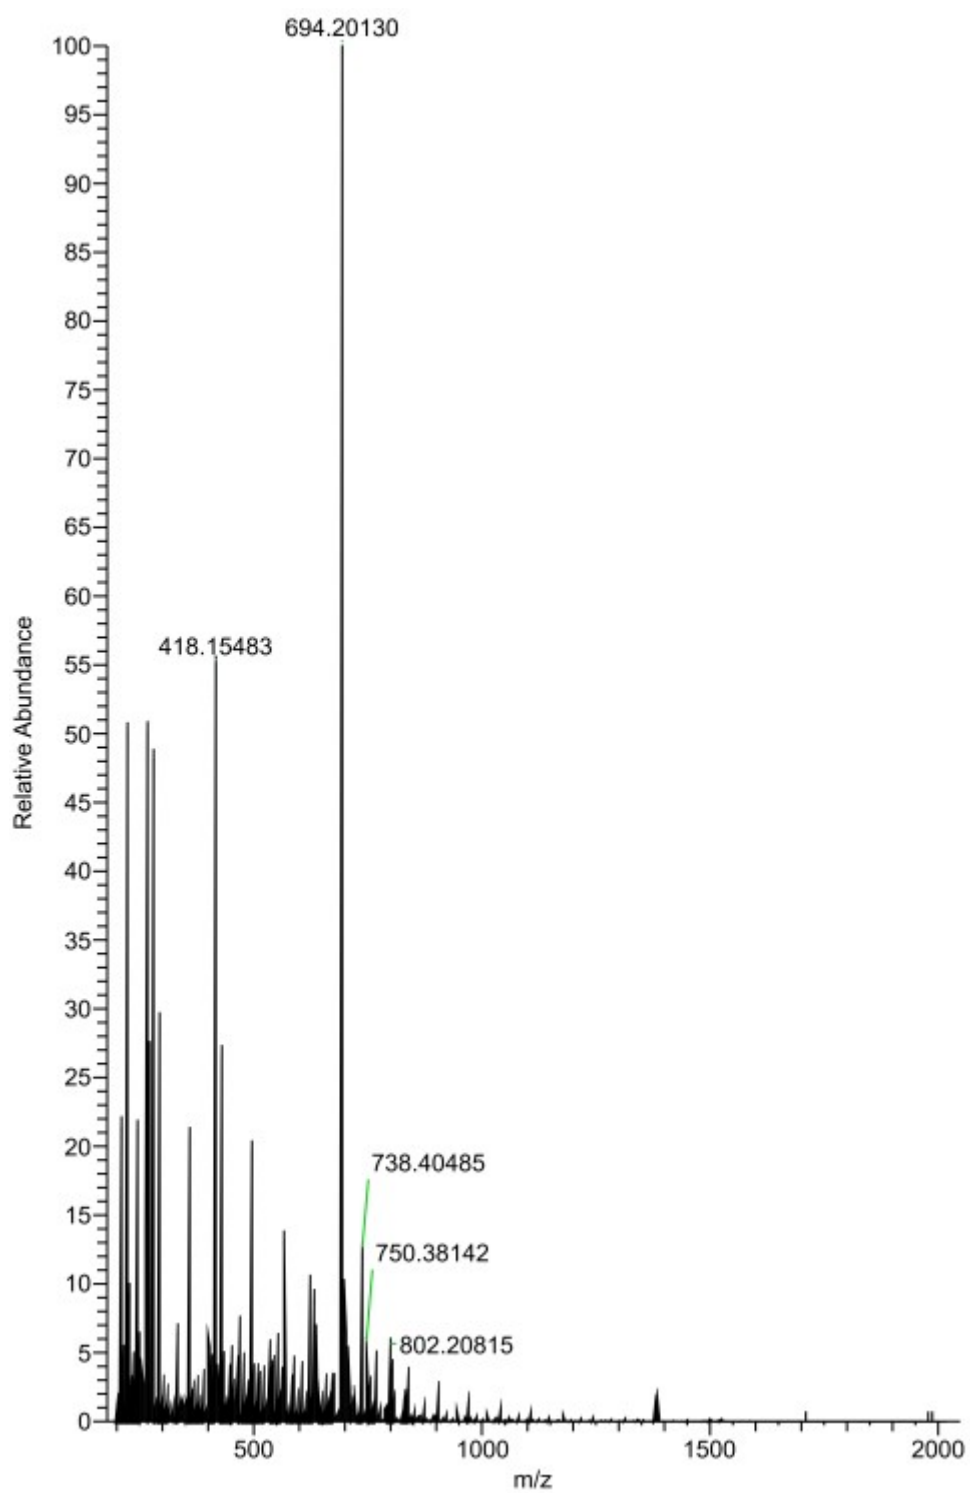



HRMS of  $[\text{Au}(\text{IPr}^{\text{Me}})(\text{OCH}(\text{CF}_3)_2)]$  (1d)

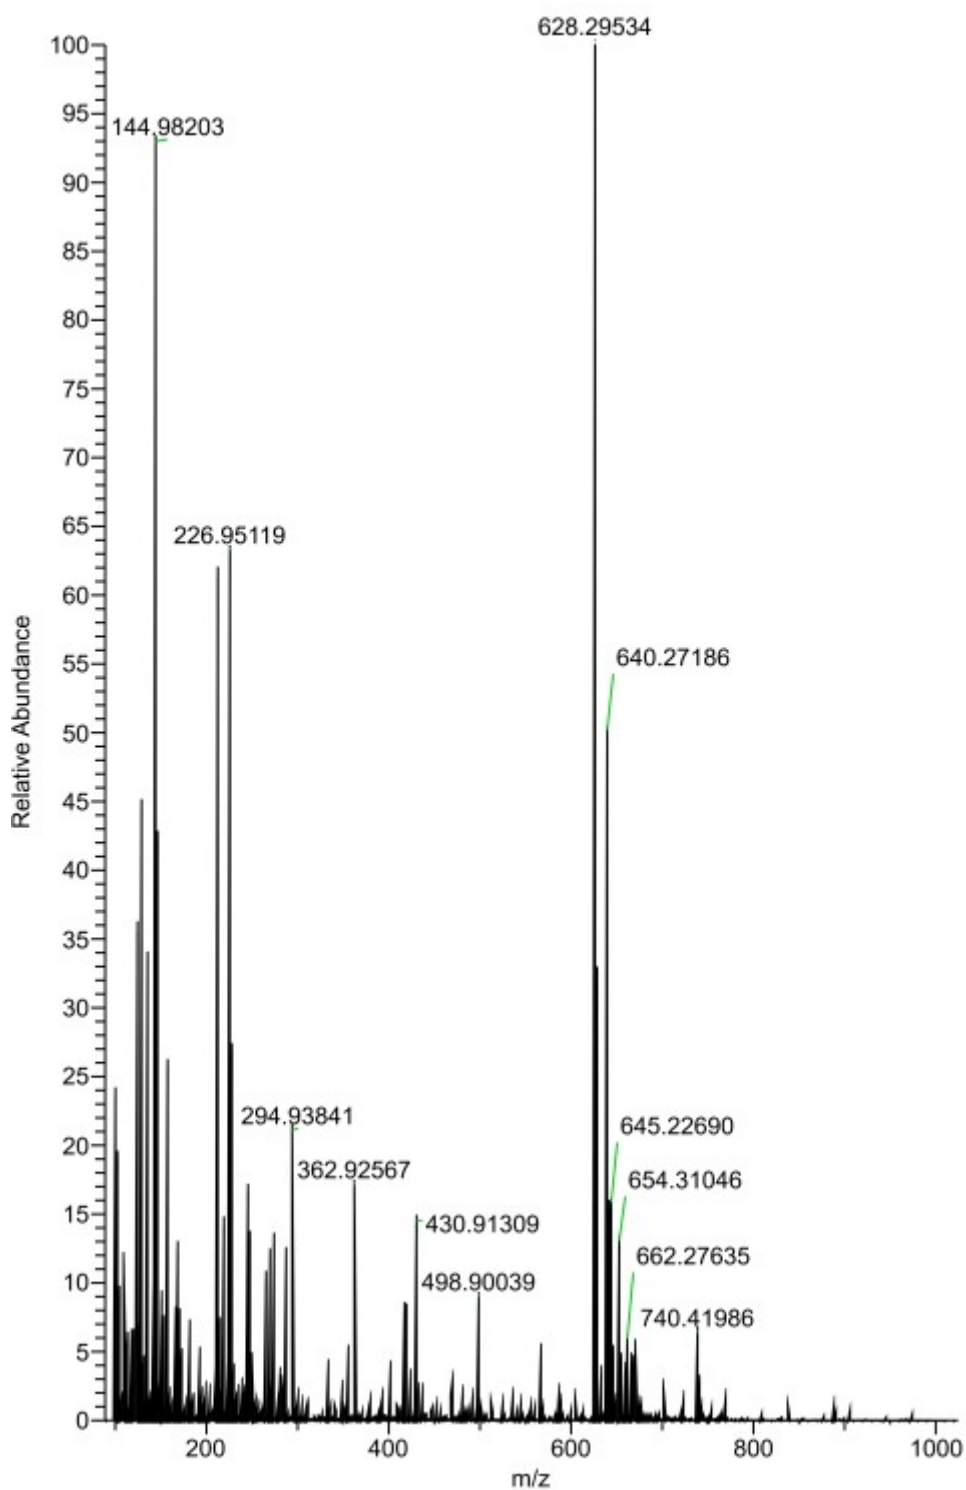

# HRMS of [Au(IPr\*)(OCH(CF<sub>3</sub>)<sub>2</sub>)] (1f)

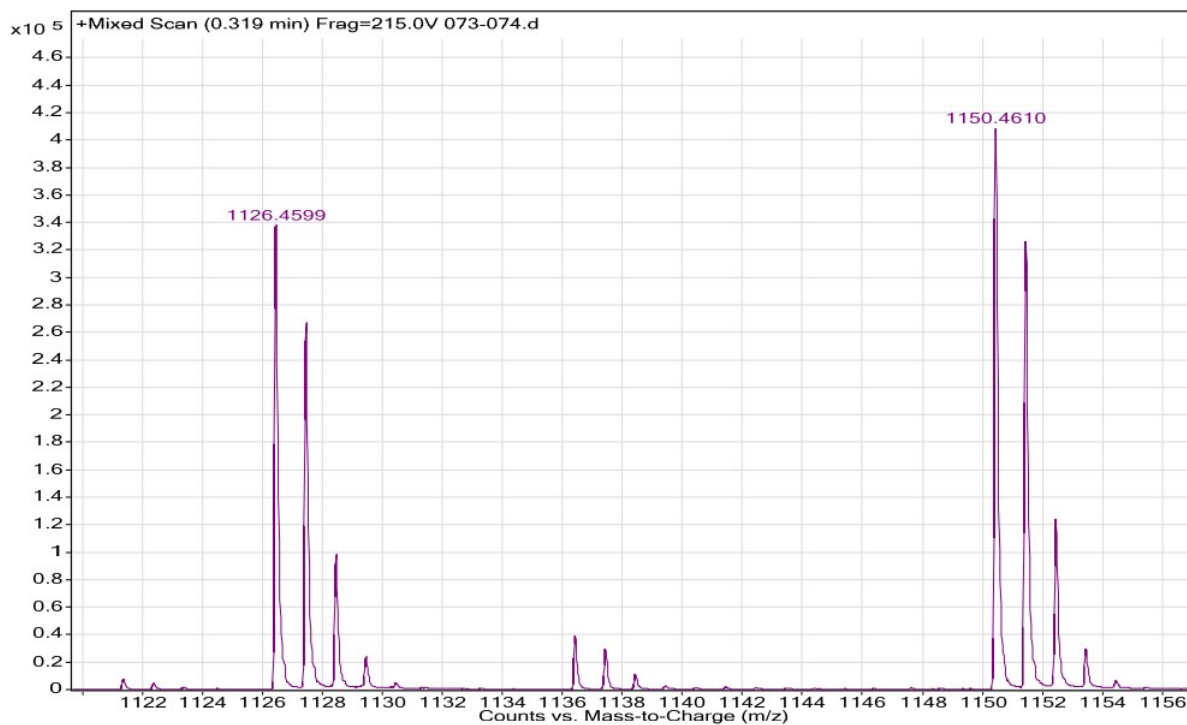

HRMS of [Au(IPent)(OCH(CF<sub>3</sub>)<sub>2</sub>)] (1g)

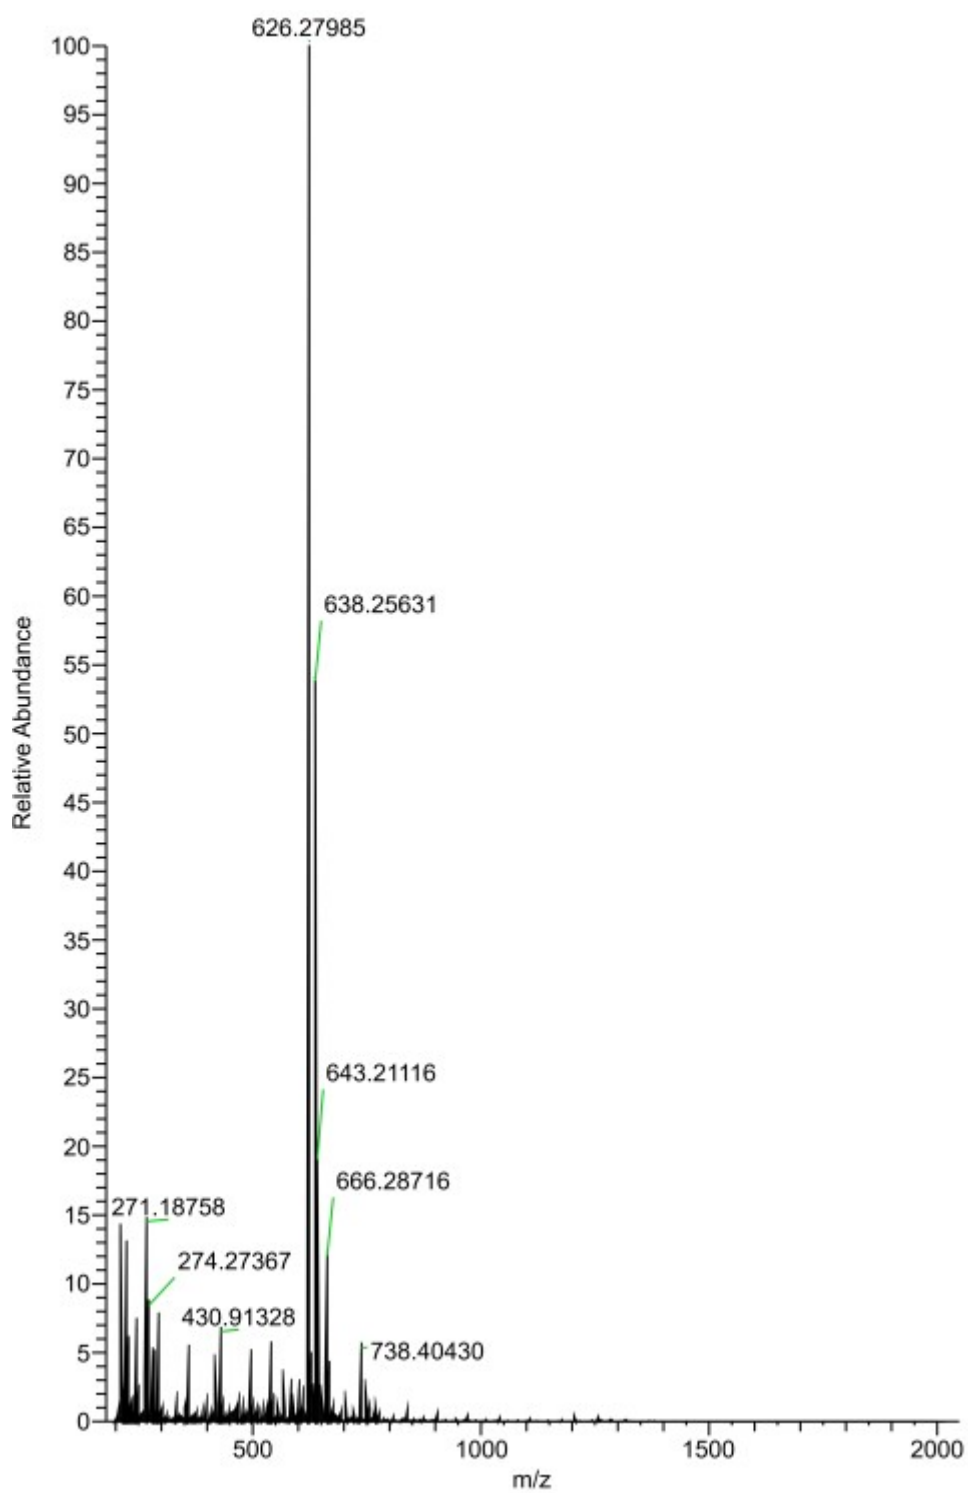

HRMS of  $[\text{Au}(\text{I}^t\text{Bu})(\text{OCH}(\text{CF}_3)_2)]$  (1h)

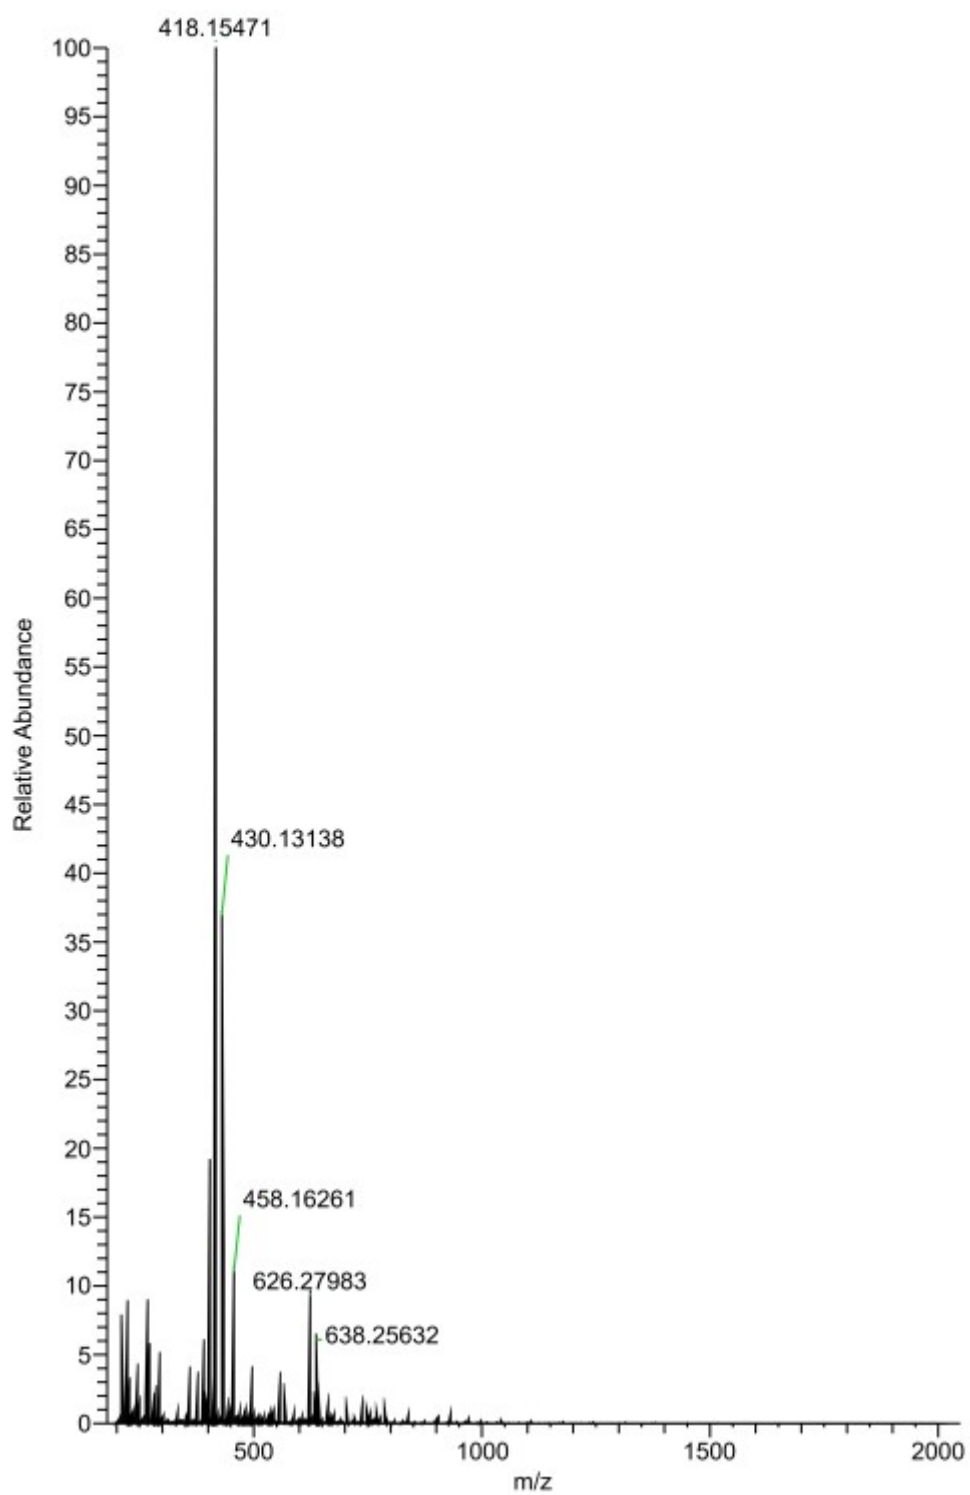

HRMS of [Au(IMes)(OCH(CF<sub>3</sub>)<sub>2</sub>)] (1i)

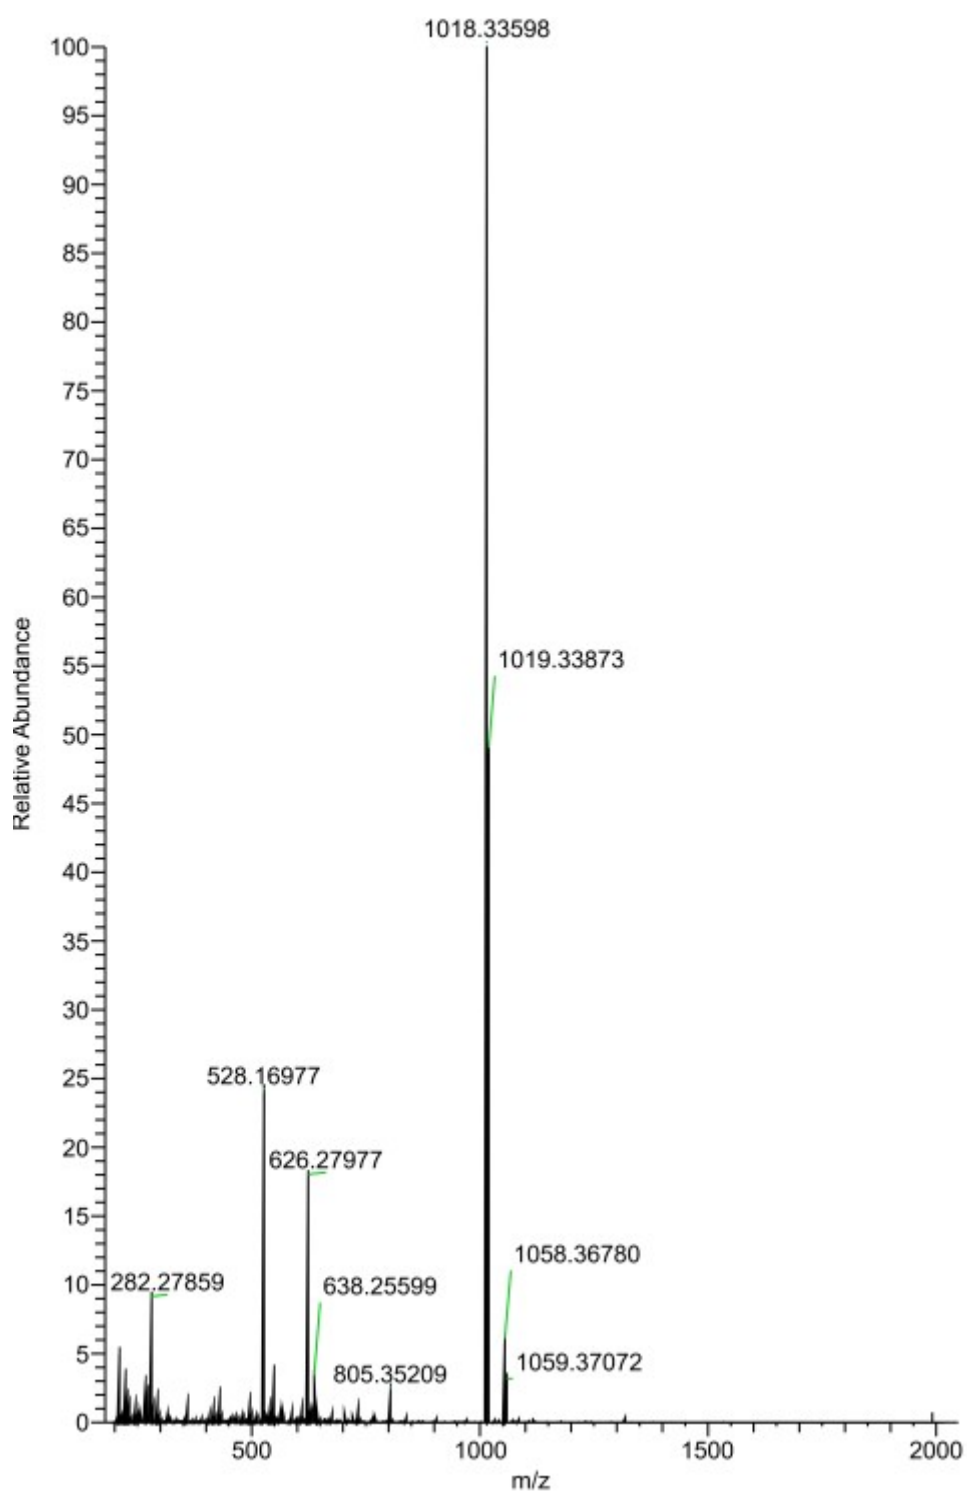

HRMS of [Au(JohnPhos)(OCH(CF<sub>3</sub>)<sub>2</sub>)] (1j)

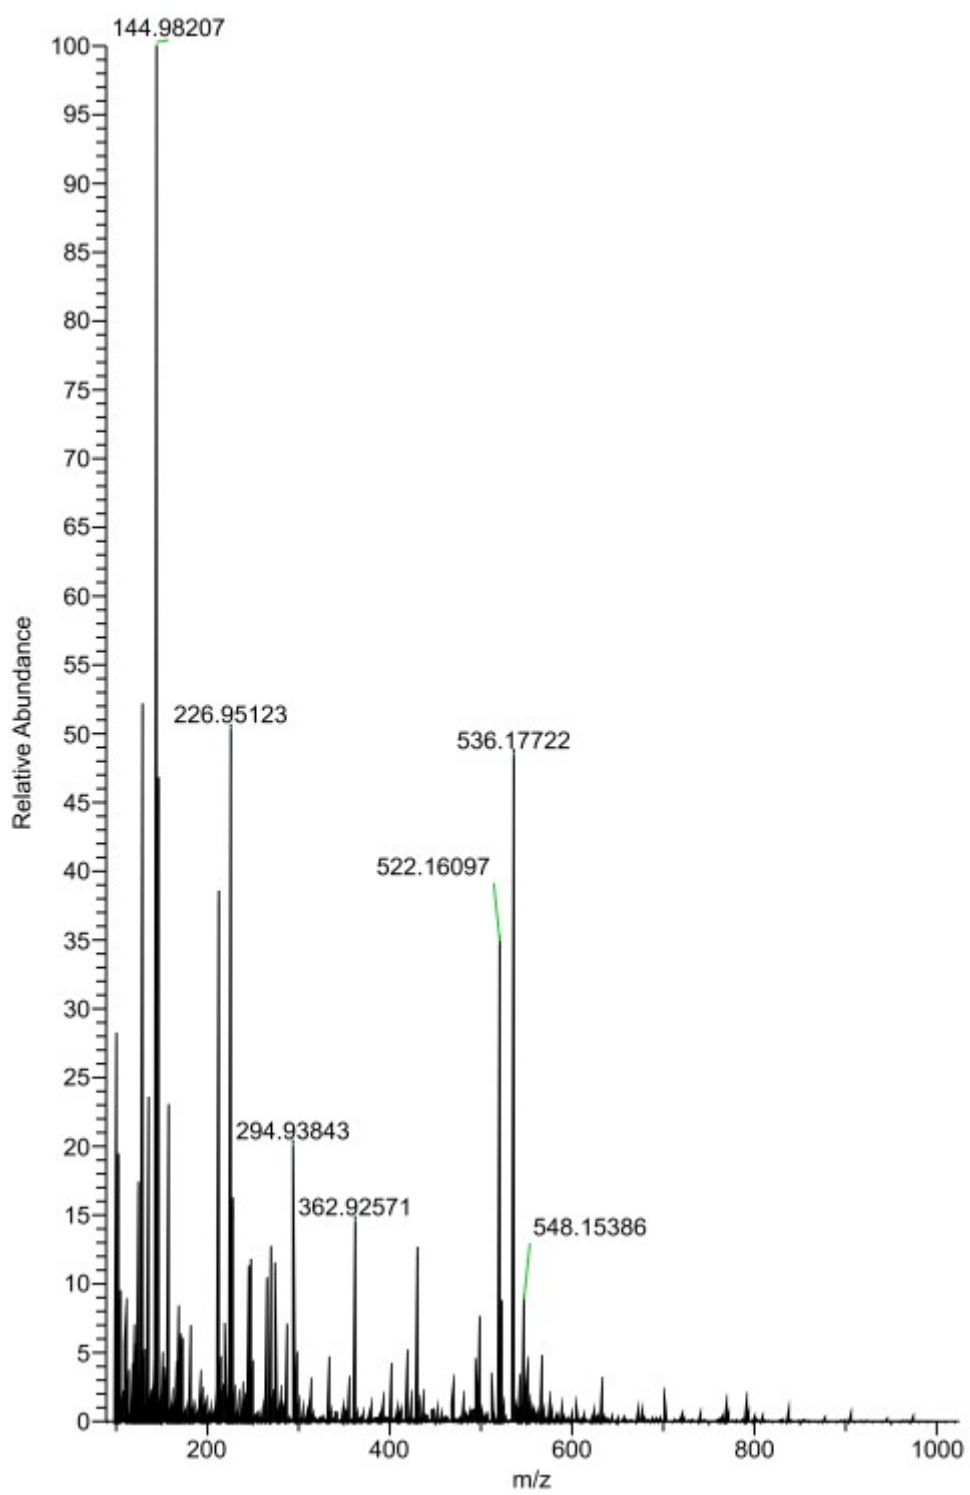

HRMS of [Au(IPr)(OCH<sub>2</sub>CF<sub>3</sub>)] (2a)

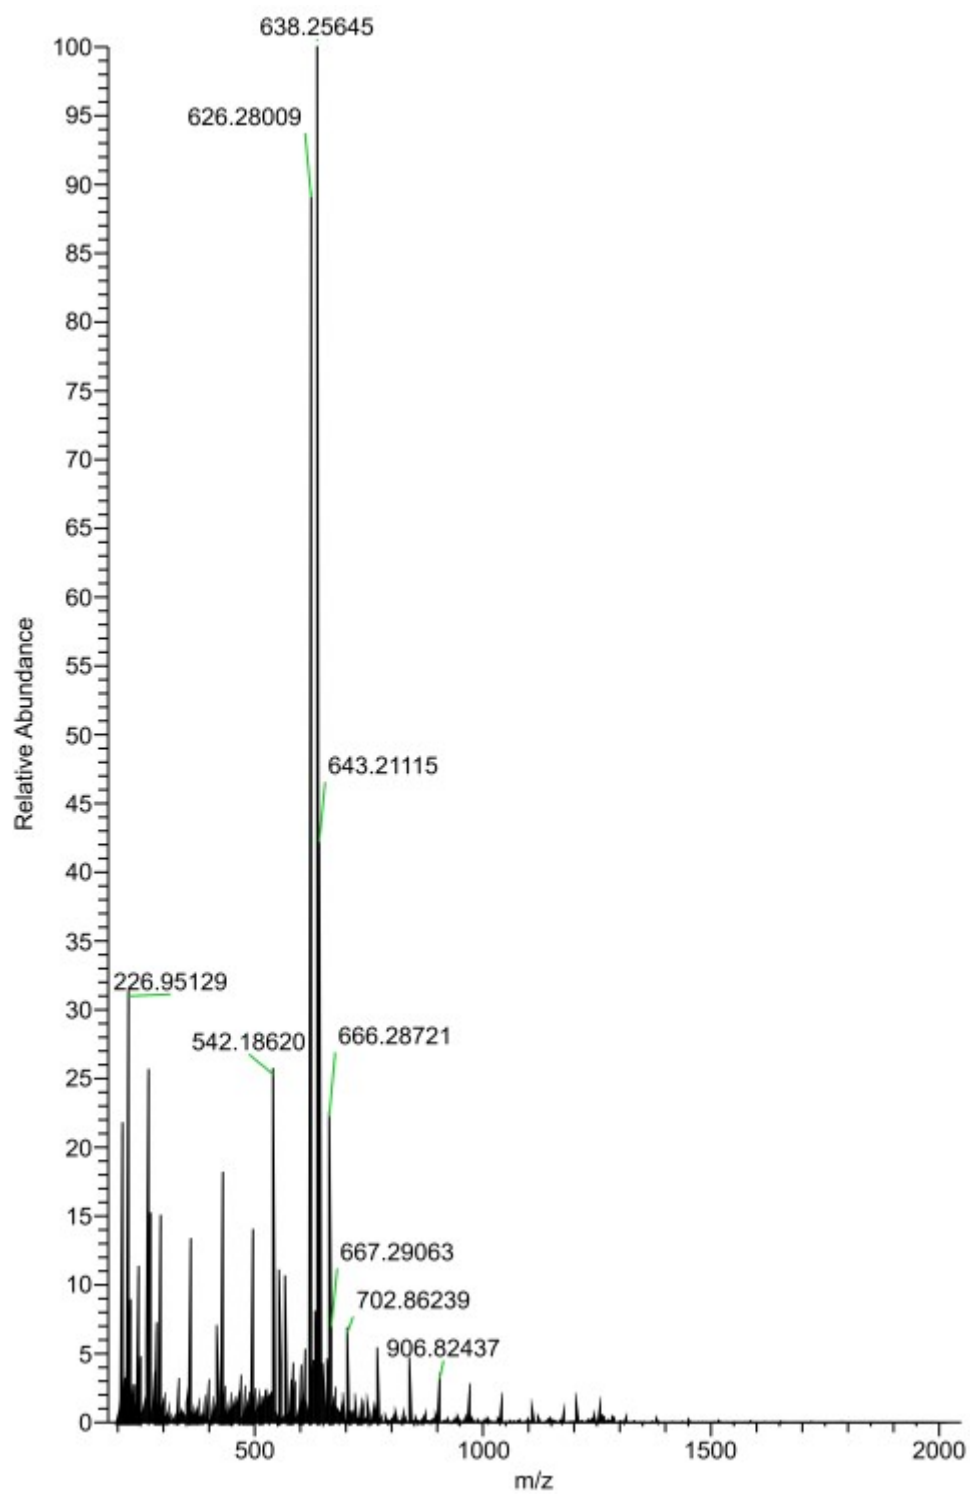

Supplement: d4dt01402b1.pdf [file d4dt01402b1.pdf]
